# Supplementary material
Source: PubMed Central journal article supplement (PMC4544880)
Supplement: NIHMS716093-supplement-Supplement.pdf [file NIHMS716093-supplement-Supplement.pdf]

## I. Numerical Simulation

To evaluate the robustness of our testing procedure across a wide variety of genes, we randomly simulated genes from Chromosome 10. We used the following strategies to conduct realistic simulations. First, we estimated the size of genes (mean=100.8Kb; standard deviation=179.7Kb) and the number of typed SNPs within each gene from the Illumina 300K SNP data, and we approximated the distribution of the gene sizes with a gamma distribution. Second, with the approximated gamma distribution, we generated allele-specific genotype data for two parents (500 mothers and 500 fathers) using HAPGEN[Marchini, et al. 2007] by randomly selecting where genes start and end. HPAGEN software was used to generate allele-specific genotypes of HapMap SNPs for a specified range of genomic location and to preserve the linkage disequilibrium structure of the interval. Third, we generated the HapMap SNP data of one offspring from parents' genotypes assuming no recombination, which resulted in 500 families with one father, one mother and one child.

Once the genotype data were generated, a causal SNP,  $S^*$  was randomly selected from the HapMap SNPs within the gene. The causal SNP was then used to generate gene expression ( $G^*$ ) and the marginal probability of having disease using the following two models:

$$G_i^* = S_i^* \alpha_S^* + \epsilon_{Gi},$$

$$\text{logit}\{P(Y_i = 1 | S_i^*, G_i^*)\} = -0.2 + S_i^* \beta_S^* + G_i^* \beta_G^* + G_i S_i^* \beta_C^*. \quad (\text{A1})$$

where  $\epsilon_{G_i}$  follow a normal distribution with mean 0 and standard deviation 0.2. Note  $\alpha_S^*$  indicates the association of a causal SNP and a gene expression, i.e., the eQTL effect, and is non-zero (=0.3) in our simulation. Within each family, disease status ( $Y$ ) was generated with the marginal probability generated above and an autoregressive correlation with the first degree correlation of 0.25. To mimic the design of MRCA data by accounting for family ascertainment, we selected

100 cases from the children of 500 families and 100 controls from parents who were non-cases. The 100 cases and 100 controls are the final study subjects in our numerical simulation. Throughout the analysis in simulation studies, we only analyzed the typed SNPs on the Illumina 300K SNP array, which may or may not contain causal SNPs that were used to generate gene expression and disease status.

In order to estimate the empirical size of the testing procedures, we simulated 500,000 data sets. In each analysis, we performed 5,000 to 250,000 resampling perturbations depending on the desired accuracy of p-values. For empirical power, we simulated 2,000 data sets and calculated the statistical power as the proportion of nominal p-values less than 0.05. Different parameter configurations that reflect different disease models (SNP-only model, main effect model and full model) were investigated. Analyses assuming exchangeable working correlation with 0.2 pairwise correlation and working independence were performed. We only presented the results assuming a working exchangeable correlation, because two methods performs similarly under the null, and the procedure assuming a working exchangeable correlation has better statistical power under the alternative.

## II. Asthma iGWAS Data Analysis

### *Forming eQTL SNP Set-Gene Expression Pairs*

Our testing procedure is built based upon the SNPs that are associated with gene expression, i.e., eQTL SNPs. Specifically, our analyses focused on the SNPs that are associated with the nearby gene within 1Mb on the same chromosome (*cis*-eQTL) with false discovery rate (FDR)[Benjamini and Hochberg 1995; Storey 2002] less than 1%, which has been published using similar datasets[Liang, et al. 2013]. We then grouped these eQTL SNPs with their corresponding gene expression as a SNPs-expression set. We had a total of 11,198 such sets. Note that the 11,198 sets represent 11,198 unique expression probes, not unique genes. A single gene may contain multiple expression probes and SNPs may be associated with multiple gene expression probes. Thus, the 11,198 sets are not independent and may contain similar gene expression value or SNPs.

### *iGWAS Analysis of Asthma*

The gene-centric iGWAS procedures for TE, ME and AE were then applied on the 11,198 SNPs-expression sets to analyze one set at a time, adjusting for age, gender and the first four principal components of the genome-wide SNP data. With 2.9GHz CPU of a laptop, it takes 54.5 minutes to perform iGWAS analyses (TE, AE and ME; 5000 perturbations) on chromosome 10. Genome-wide statistical significance was set as  $FDR < 1\%$ . For the top candidate genes identified from iGWAS, single-locus analyses were performed on a single eQTL SNP with its associated gene expression. Mediation analyses for each single locus were also performed with adjustment of the same covariates described above. We estimated the Mediation Effect and the Alternative Effect on the log odds ratio scale using equations (3) and (4). The variance was approximated using bootstrap[Vanderweele and Vansteelandt 2010]. The proportion of mediation, a measure of the proportion of the genetic effect mediated by the gene expression,

was calculated on the risk difference scale by  $OR^{AE}(OR^{ME} - 1)/(OR^{AE}OR^{ME} - 1)$ , where  $OR^{AE}$  and  $OR^{ME}$  are the Alternative and Mediation Effect odds ratios, respectively[Vanderweele and Vansteelandt 2010]. Of note, the proportion of mediation is interpretable only if the directionality of the AE and ME is consistent, i.e., both hazardous or both protective.

### III. Asymptotics of $Q$ statistics

*Asymptotic Distribution of  $Q^{TE}$*

Define  $\mathbf{D} = \begin{bmatrix} \mathbf{D}_{XX} & \mathbf{D}_{XV} \\ \mathbf{D}_{VX} & \mathbf{D}_{VV} \end{bmatrix} = m^{-1} \mathbf{U}^T \mathbf{W} \mathbf{U}$ , and  $\mathbf{D}^* = m^{-1} \mathbf{U}^T \mathbf{W}_2^{\frac{1}{2}} \mathbf{R}^* \mathbf{W}_2^{\frac{1}{2}} \mathbf{U}$ , where  $\mathbf{U}^T = (\mathbf{U}_1, \dots, \mathbf{U}_m)$ ,

$\mathbf{U}_i^T = (\mathbf{X}_i^T, \mathbf{R}_i^{-1} \mathbf{V}_i^T)$ ,  $\mathbf{V}_i^T = (\sqrt{w_1} \mathbf{S}_i^T, \sqrt{w_2} \mathbf{G}_i^T, \sqrt{w_3} \mathbf{C}_i^T)$  for  $Q_{SGC}^{TE}$ ,  $(\sqrt{w_1} \mathbf{S}_i^T, \sqrt{w_2} \mathbf{G}_i^T)$  for  $Q_{SG}^{TE}$ , or  $(\sqrt{w_1} \mathbf{S}_i^T)$

for  $Q_S^{TE}$ ,  $\mathbf{R}^*$  is the true correlation matrix,  $\mathbf{W} = \text{diag}\{\mathbf{W}_i\}$  and  $\mathbf{W}_i = \text{diag} \left\{ \frac{\exp(\mathbf{X}_{ij}^T \hat{\boldsymbol{\beta}}_{X0})}{(1 + \exp(\mathbf{X}_{ij}^T \hat{\boldsymbol{\beta}}_{X0}))^2} \right\}$ ,

$j = 1, \dots, n_i$  (the number of subject in family  $i$ ),  $i = 1, \dots, m$  (the number of families). Furthermore,

we let  $\boldsymbol{\epsilon}$  denote a Normal  $(\mathbf{0}, \mathbf{D}^*)$  random vector and  $\mathbf{A} = [-\mathbf{D}_{XV}^T \mathbf{D}_{XX}^{-1}, \mathbf{I}]$  where  $\mathbf{I}$  is an identity

matrix. It can be shown that under the null, the limiting distribution of test statistic  $Q^{TE}$  is a

mixture of  $\chi^2$  distribution:

$$Q^{TE} \xrightarrow{d} \|\mathbf{A}\boldsymbol{\epsilon}\|^2. \quad (\text{A2})$$

The mixture of  $\chi^2$  distribution can be approximated with the inversion of characteristic function [Davies 1980]. Alternatively, we use the asymptotic distribution to develop a perturbation procedure to approximate the distribution by resampling the limiting distribution [Huang, et al. 2014]. Our discussion will focus on the perturbation method because it can be easily adapted to construct an omnibus test that accommodates various candidate models. We use (A2) to develop a perturbation procedure, approximating the respective distribution of  $Q_S^{TE}$ ,  $Q_{SG}^{TE}$  and  $Q_{SGC}^{TE}$  under the null using the empirical counterpart of  $\mathbf{A}$  and  $\boldsymbol{\epsilon}$ .

*Asymptotic Distribution of  $Q^{ME}$  and GCV function*

It can be shown that for  $\lambda = o(\sqrt{m})$ , the test statistic as a function of the tuning parameter,  $\hat{\boldsymbol{\beta}}_{X0}$

and  $\hat{\boldsymbol{\beta}}_{S0}$ ,  $Q^{ME}(\lambda, \hat{\boldsymbol{\beta}}_{X0}, \hat{\boldsymbol{\beta}}_{S0})$  follows a similar asymptotic distribution as the Total Effect. Denote

$\boldsymbol{\epsilon} \sim N(\mathbf{0}, \mathbf{D}^*)$  and  $\mathbf{D}^* = m^{-1} \mathbf{U}^T \mathbf{W}_{ME}^{\frac{1}{2}} \mathbf{R}^* \mathbf{W}_{ME}^{\frac{1}{2}} \mathbf{U}$ , the asymptotic distribution of the test statistic is:

$$Q^{ME}(\lambda, \hat{\boldsymbol{\beta}}_{X_0}, \hat{\boldsymbol{\beta}}_{S_0}) \xrightarrow{d} \|\mathbf{A}(\lambda)\boldsymbol{\epsilon}\|^2, \quad (\text{A3})$$

where  $\mathbf{A}(\lambda) = [-\mathbf{D}_{\tilde{X}V}^T \mathbf{D}_{\tilde{X}\tilde{X}}^{-1}, \mathbf{I}]$ ,  $\mathbf{D}(\lambda) = \begin{bmatrix} \mathbf{D}_{\tilde{X}\tilde{X}} & \mathbf{D}_{\tilde{X}V} \\ \mathbf{D}_{V\tilde{X}} & \mathbf{D}_{VV} \end{bmatrix} = m^{-1} \mathbf{U}^T \mathbf{W}_{ME} \mathbf{U} + \lambda \mathbf{I}_2$ ,  $\mathbf{U}^T = (\mathbf{U}_1, \dots, \mathbf{U}_m)$ ,

$\mathbf{U}_i^T = (\tilde{\mathbf{X}}_i^T, \mathbf{R}_i^{-1} \mathbf{V}_i^T)$ ,  $\tilde{\mathbf{X}}_i^T = (\mathbf{X}_i^T, \mathbf{S}_i^T)$ ,  $\mathbf{V}_i^T = (\sqrt{w_2} \mathbf{G}_i^T, \sqrt{w_3} \mathbf{C}_i^T)$  for  $Q_{SGC}^{ME}$  or  $\sqrt{w_2} G_i$  for  $Q_{SG}^{ME}$ ,  $\mathbf{W}_{ME} =$

$\text{diag}\{\mathbf{W}_{ME,i}\}$  and  $\mathbf{W}_{ME,i} = \text{diag} \left\{ \frac{\exp(\mathbf{X}_{ij}^T \hat{\boldsymbol{\beta}}_{X_0} + \mathbf{S}_{ij}^T \hat{\boldsymbol{\beta}}_{S_0})}{(1 + \exp(\mathbf{X}_{ij}^T \hat{\boldsymbol{\beta}}_{X_0} + \mathbf{S}_{ij}^T \hat{\boldsymbol{\beta}}_{S_0}))^2} \right\}$ , and  $\mathbf{I}_2$  is a  $(q + 2p + 1) \times (q + 2p + 1)$

block diagonal matrix with the top  $q \times q$  block diagonal matrix being 0, the middle  $p \times p$  diagonal matrix being an identify matrix,  $\mathbf{I}_{p \times p}$  and the bottom  $(p + 1) \times (p + 1)$  diagonal matrix being 0 for

$Q_{SGC}^{ME}$ , and a  $(q + p + 1) \times (q + p + 1)$  block diagonal matrix for  $Q_{SG}^{ME}$ . The tuning parameter  $\lambda$  can

be chosen as a minimizer of the GCV function  $\frac{(\mathbf{Y} - \hat{\boldsymbol{\mu}}_0)^T \mathbf{W}_{ME}^{-1} (\mathbf{Y} - \hat{\boldsymbol{\mu}}_0)}{m(1 - \text{tr}(\mathbf{H}))^2}$ , where  $\mathbf{H} = \mathbf{W}_{ME}^{-1} \tilde{\mathbf{X}} (\tilde{\mathbf{X}}^T \mathbf{W}_{ME} \tilde{\mathbf{X}} +$

$\lambda \mathbf{I}_2)^{-1} \tilde{\mathbf{X}}^T$  and  $\tilde{\mathbf{X}}^T = (\tilde{\mathbf{X}}_1, \dots, \tilde{\mathbf{X}}_m)$ .

#### IV. Numerical Results for AE, ME and TE

##### *Under the null*

Empirical sizes for the proposed tests of AE, ME and TE under the family-based design are presented in Table S1. The iGWAS testing procedures for the AE and ME under the two candidate models: 1) main effect model of SNPs and gene expression ( $Q_{SG}$ ), and 2) full model allowing for both main effects and SNP-by-expression interactions ( $Q_{SGC}$ ) protects Type I error and so does the omnibus tests. Type I error is also well protected in tests for the TE under the three model assumptions: 1) SNP-only model ( $Q_S$ ), 2) main effect model ( $Q_{SG}$ ), and 3) full model ( $Q_{SGC}$ ) as well as the omnibus test ( $Q_{omb}$ ) that does not require assuming which of the three models is the true model. Under the null of no effect of the gene on disease risk, all three tests are valid. Note that the simulation studies were conducted for random genes with various sizes across different regions on Chromosome 10. Therefore, the results for AE, ME and TE are robust under a wide variety of linkage disequilibrium structures and different numbers of typed SNPs within a gene. Also, the proposed tests based on estimating equations are not biased by the family ascertainment. For smaller sizes ( $5 \times 10^{-4}$  or  $5 \times 10^{-5}$ ), the tests are a little conservative. The conservative test size may be due to the modest sample size in the simulation studies (100 cases and 100 controls) that was used to mimic the motivating example. The iGWAS approach is based on variance component score tests, the size of which has been shown to approach the low nominal level when the sample size becomes large [Wu, et al. 2011].

##### *Under the alternative*

The performance of three tests for AE or ME ( $Q_{SG}$ ,  $Q_{SGC}$  and  $Q_{omb}$ ) under the alternative hypotheses was compared under two different disease models with the family-based design. The numerical results are presented in Figure S1. The first scenario is that both the causal SNP and gene expression have effects on the outcome but there is no SNP-by-gene expression

interaction ( $\beta_G^* = 0.2, \beta_C^* = 0$  in (A1)). In this setting, the main effect model,  $Q_{SG}$  for ME assuming the correct model has the optimal statistical power (Figure S1A). For AE, the full model ( $Q_{SGC}$ ) has a comparable performance with the main effect model ( $Q_{SG}$ ) (Figure S1C). The omnibus test ( $Q_{omb}$ ) can almost reach the optimal power. The second scenario allows for an interaction between gene expression and the causal SNP ( $\beta_G^* = 0.2, \beta_C^* = 0.3$  in (A1)). The  $Q_{SGC}$ 's for ME and AE under the full model perform optimally as it assumes a correct model form (Figures S1B and S1D). The main effect model ( $Q_{SG}$ ) has a very similar performance to the full model ( $Q_{SGC}$ ). Although the full model assumes a correct model specification, it also spends extra degrees of freedom to test for the interactive effects. The trade-off between the two may lead to the similar performance in the main effect model and the full model. Again, the omnibus test ( $Q_{omb}$ ) can almost reach the best power without the need of assuming which is the true model.

The performance of four tests for the TE ( $Q_S, Q_{SG}, Q_{SGC}$  and  $Q_{omb}$ ) was compared under three different disease models under the family-based design, presented in Figure S2. The first scenario is that the causal SNP has an effect on the outcome, but both gene expression and the SNP-by-expression interaction have no effect ( $\beta_G^* = \beta_C^* = 0$  in (A1)). When the effect of SNP is modest, the SNP-only model,  $Q_S$  outperforms the other models; when the effect of the SNP becomes larger, the main effect model,  $Q_{SG}$  performs better (Figure S2A). Because the causal SNP is not necessarily a typed SNP in our simulation, gene expression may better capture the effect of causal SNP than the typed SNPs. This may explain the power gain of the main effect model ( $Q_{SG}$ ) under strong SNP-only effects. The omnibus test ( $Q_{omb}$ ) reaches the optimal test regardless of the magnitude of SNP effect. For the second scenario under the main effect model ( $\beta_G^* = 0.2, \beta_C^* = 0$  in (A1)),  $Q_{SG}$  for TE assuming the correct model has the optimal statistical power (Figure S2B). The SNP-only model,  $Q_S$ , in contrast, has a poor performance as it fails to capture the effect of gene expression. The omnibus test ( $Q_{omb}$ ) can almost reach the optimal power of the main effect model,  $Q_{SG}$ . Under the third scenario ( $\beta_G^* = 0.2, \beta_C^* = 0.3$  in (A1)),  $Q_{SGC}$



performs optimally as it assumes a correct model form, and the SNP-only model,  $Q_S$  loses considerable power (Figure S2C). The main effect model ( $Q_{SG}$ ) has a very similar performance to the full model ( $Q_{SGC}$ ) due to the trade-off between correct model specification and extra degrees of freedom for the interactive effects. Again, the omnibus test ( $Q_{omb}$ ) can almost reach the optimal power.

Figure S1. Power for the tests of Alternative and Mediation Effects from simulation studies under the family-based design.  $Q_{SG}$  assumes a model with main effects of SNP and gene expression;  $Q_{SGC}$  assumes a model with SNP, gene expression and their interaction;  $Q_{omb}$  is the omnibus test for  $Q_{SG}$  and  $Q_{SGC}$ . A. Power of testing the Mediation Effect under a main effect model ( $\beta_S^* = 0.2$  and  $\beta_C^* = 0$ ); B. Power of testing the Mediation Effect under an interaction model ( $\beta_S^* = 0.2$  and  $\beta_C^* = 0.3$ ); C. Power of testing the Alternative Effect under a main effect model ( $\beta_G^* = 0.2$  and  $\beta_C^* = 0$ ); D. Power of testing the Alternative Effect under an interaction model ( $\beta_G^* = 0.2$  and  $\beta_C^* = 0.3$ ).

A

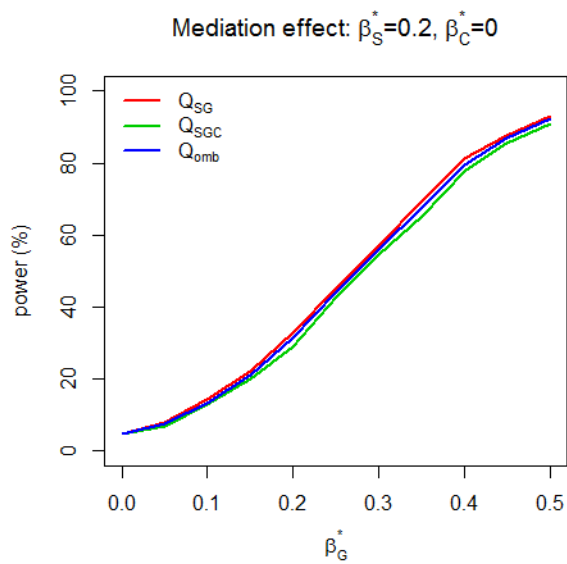

B

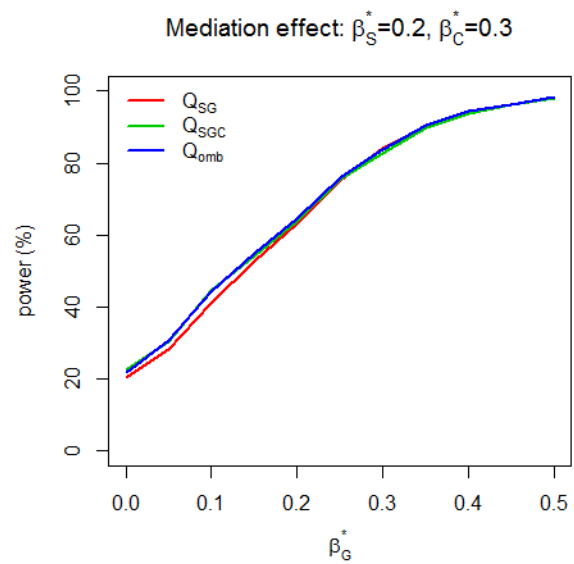

C

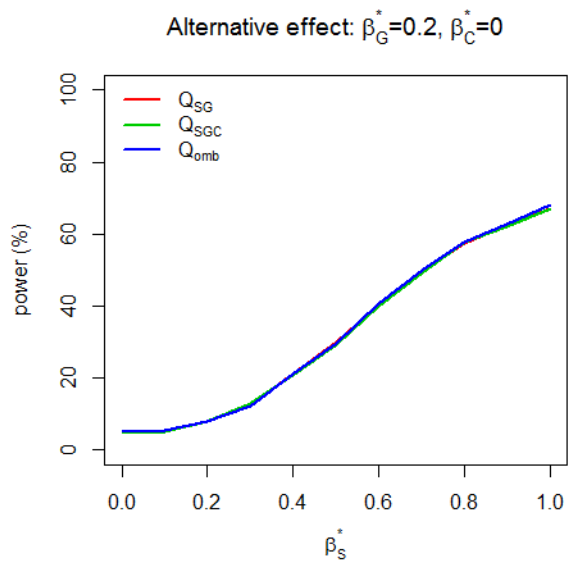

D

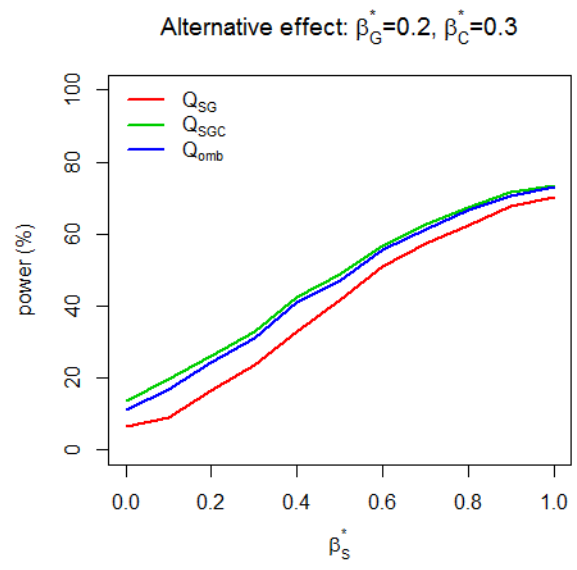

Figure S2. Power for the test of Total Effect from simulation studies under the family-based design.  $Q_S$  assumes an SNP-only model;  $Q_{SG}$  assumes a model with main effects of SNP and gene expression;  $Q_{SGC}$  assumes a model with SNP, gene expression and their interaction;  $Q_{omb}$  is the omnibus test for  $Q_S$ ,  $Q_{SG}$  and  $Q_{SGC}$ . A. True underlying disease model is an SNP-only model ( $\beta_G^* = \beta_C^* = 0$ ); B. true model is a main effect model ( $\beta_G^* = 0.2$  and  $\beta_C^* = 0$ ); C. true model is an interaction model ( $\beta_G^* = 0.2$  and  $\beta_C^* = 0.3$ ).

A

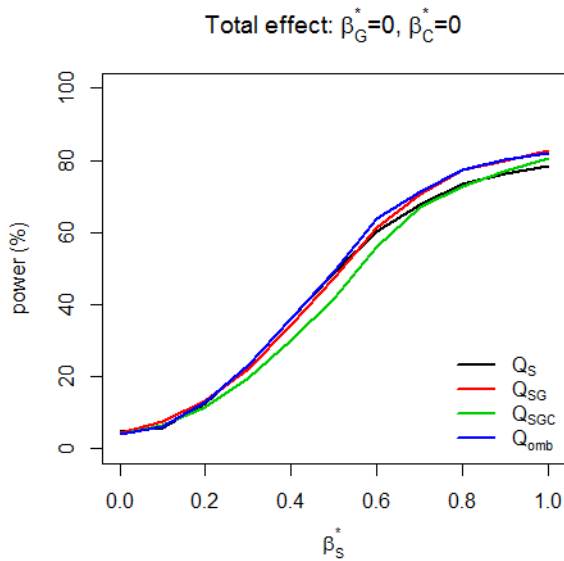

B

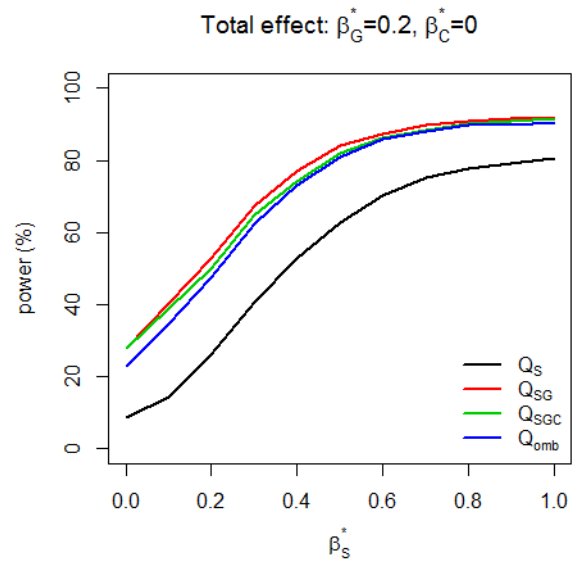

C

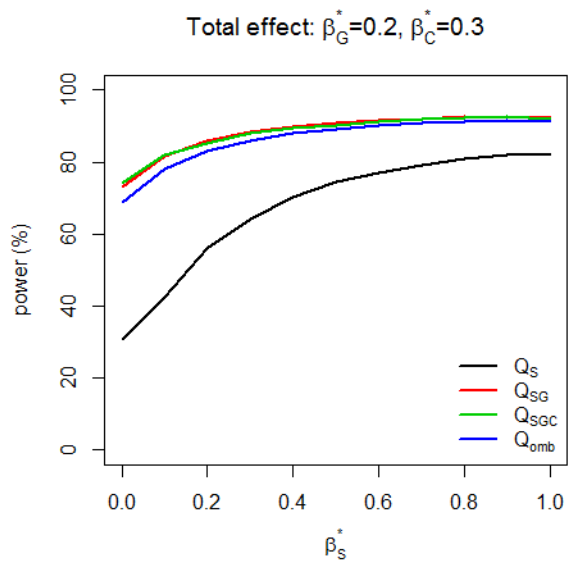

Figure S3. Manhattan plots of genome-wide scan for total effects with gene-centric iGWAS approach. A. SNP-only analyses ( $Q_S$ ); B. analyses with both SNPs and gene expression ( $Q_{SG}$ ); C. analyses with SNPs, gene expression and their cross-product interactions ( $Q_{SGC}$ ). Red dots indicate the eight transcripts found from the omnibus test with  $FDR < 1\%$ .

A

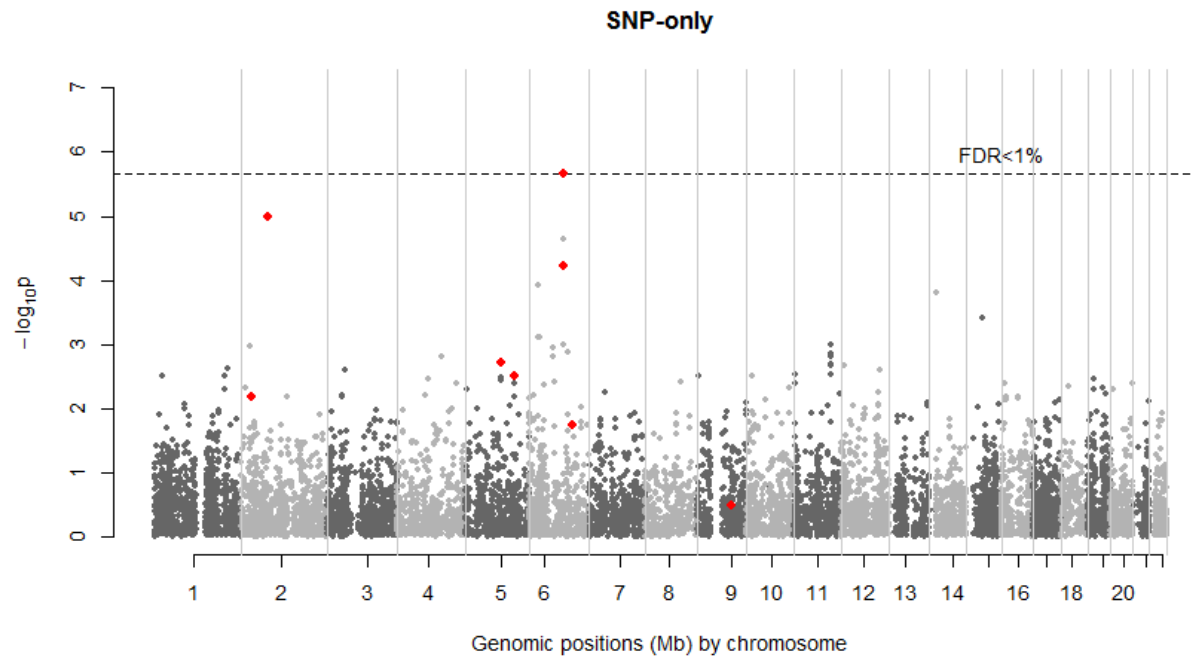

B

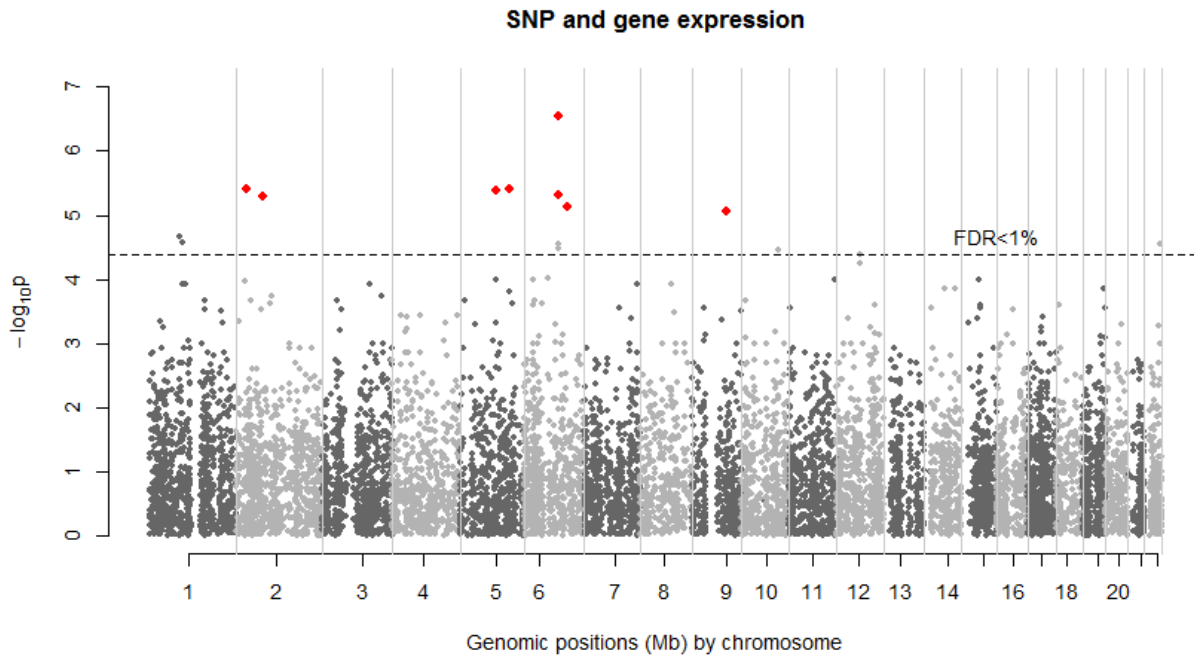

C

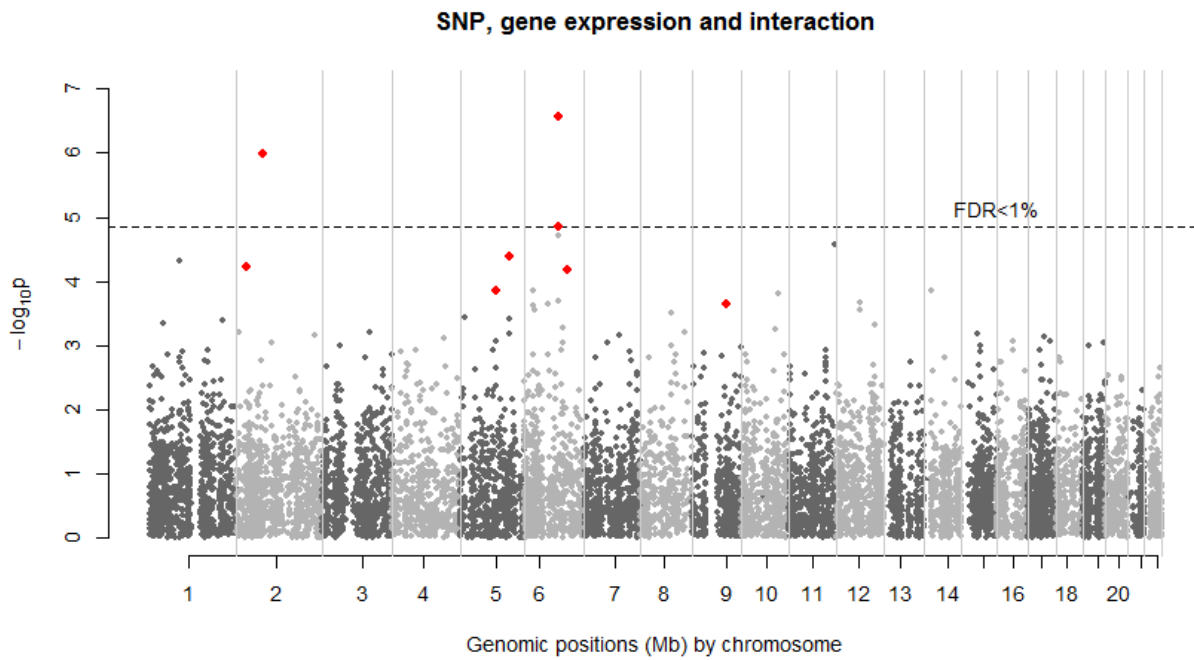

Figure S4. Manhattan plots of genome-wide scan for mediation effects with gene-centric iGWAS approach. A. analyses with both SNPs and gene expression main effects ( $Q_{SG}^{ME}$ ); B. analyses with SNPs, gene expression and their cross-product interactions ( $Q_{SGC}^{ME}$ ). Red dots indicate the transcripts found from the omnibus test with  $FDR < 1\%$ .



A

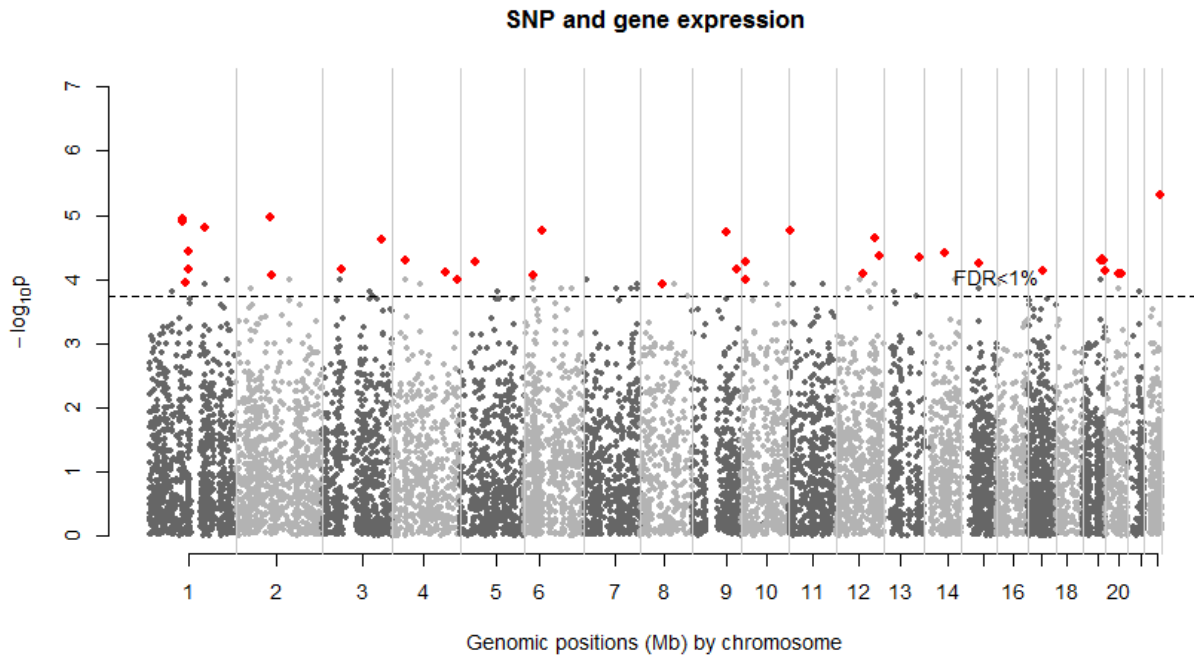

B

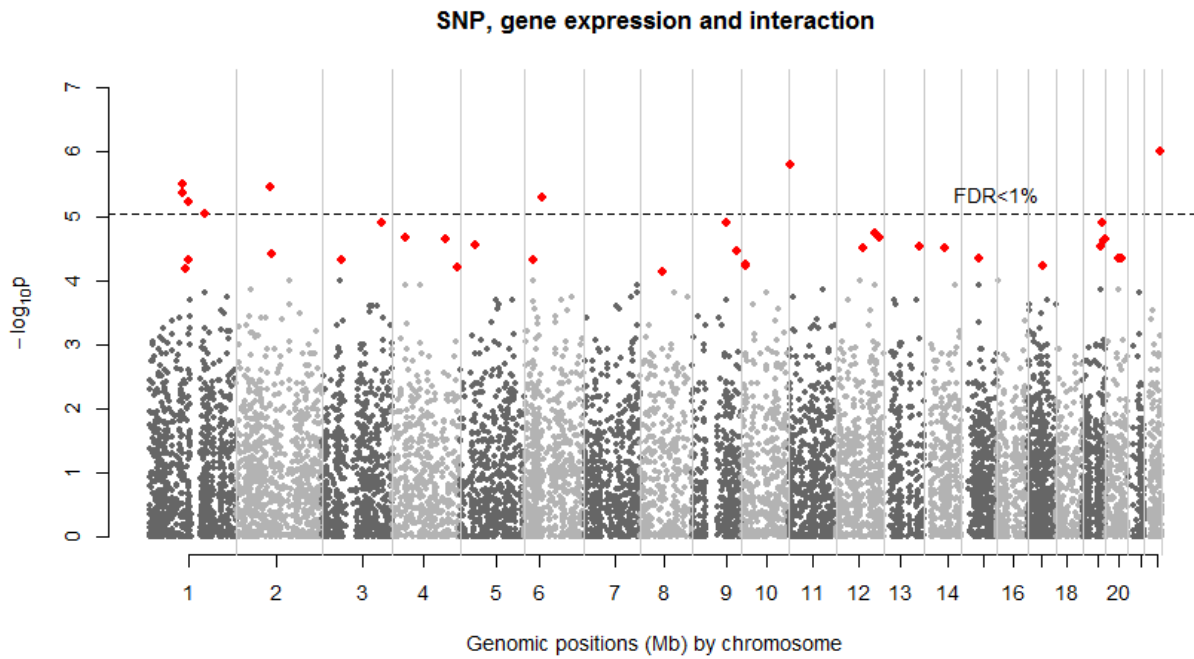

Figure S5. Manhattan plots of genome-wide scan for alternative effects with gene-centric iGWAS approach. A. analyses with both SNPs and gene expression main effects ( $Q_{SG}^{AE}$ ); B. analyses with SNPs, gene expression and their cross-product interactions ( $Q_{SGC}^{AE}$ ).

A

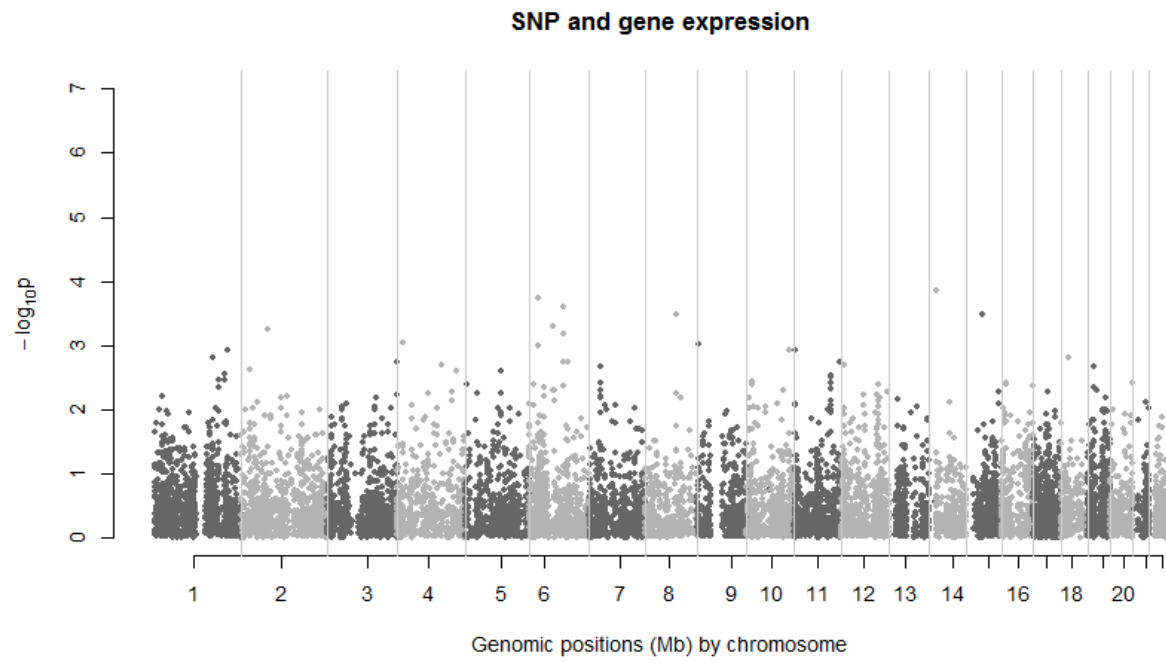

B

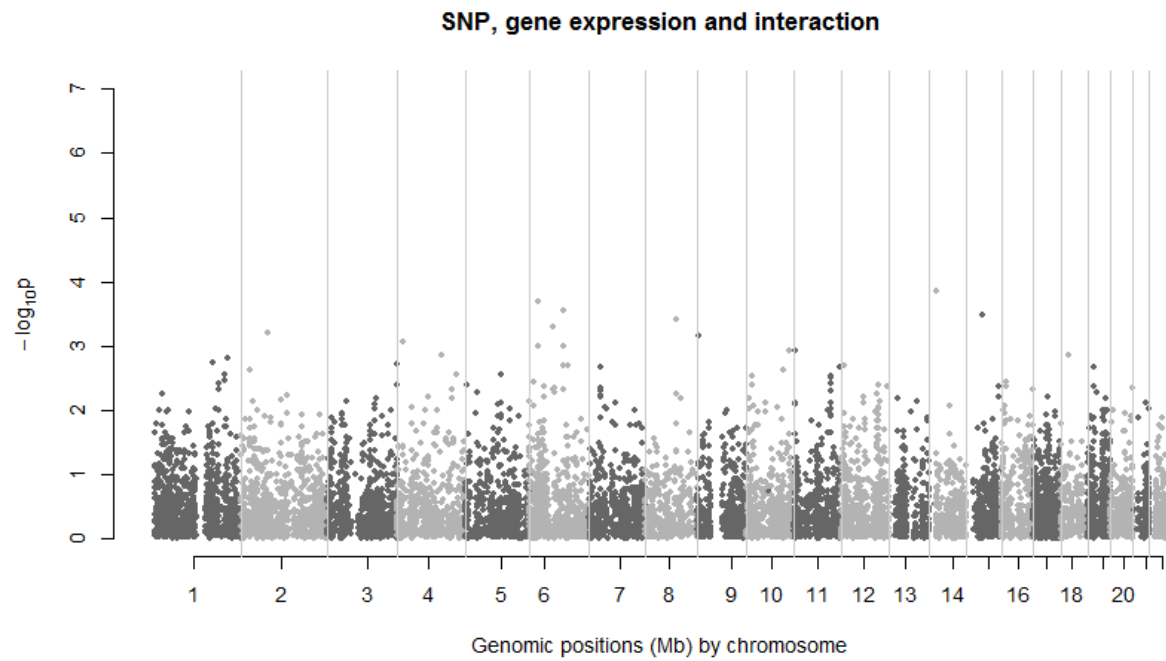

Figure S6. Plots of p-values from different tests in single-locus analyses for *LYCAT*. Lower panel represents the pairwise linkage disequilibrium structure for the SNPs within each gene, measured as  $r^2$  ranging from 0 (white) to 1 (black). TE: total effect; AE: alternative effect; ME: mediation effect;  $Q_S$ : tests assuming a SNP-only model;  $Q_{SG}$ : tests assuming a model with main effects of SNPs and gene expression;  $Q_{SGC}$ : tests assuming a model with effects of SNPs, gene expression and their interactions;  $Q_{omb}$ : omnibus tests.

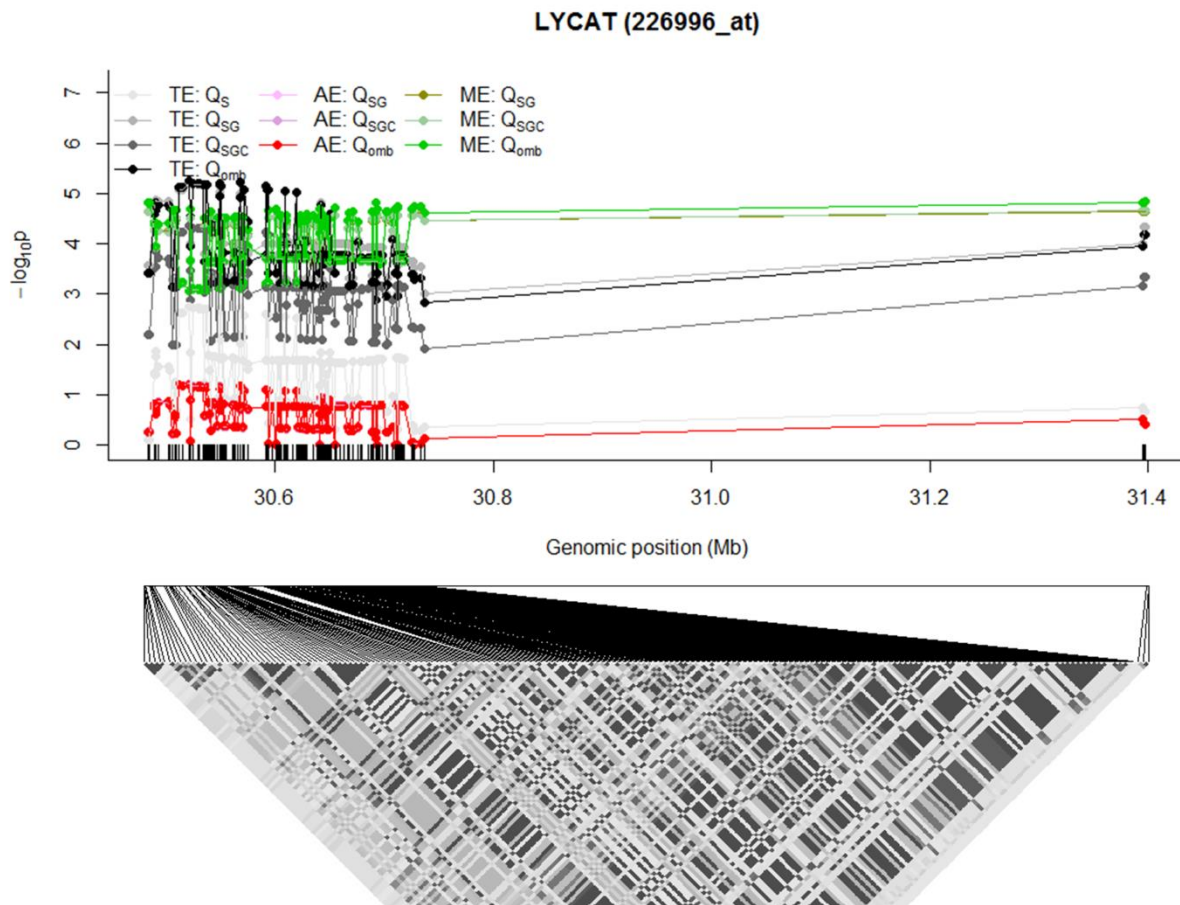

Figure S7. Plots of p-values from different tests in single-locus analyses for *ST8SIA4*. Abbreviations and notations are the same as those in Figure S1.

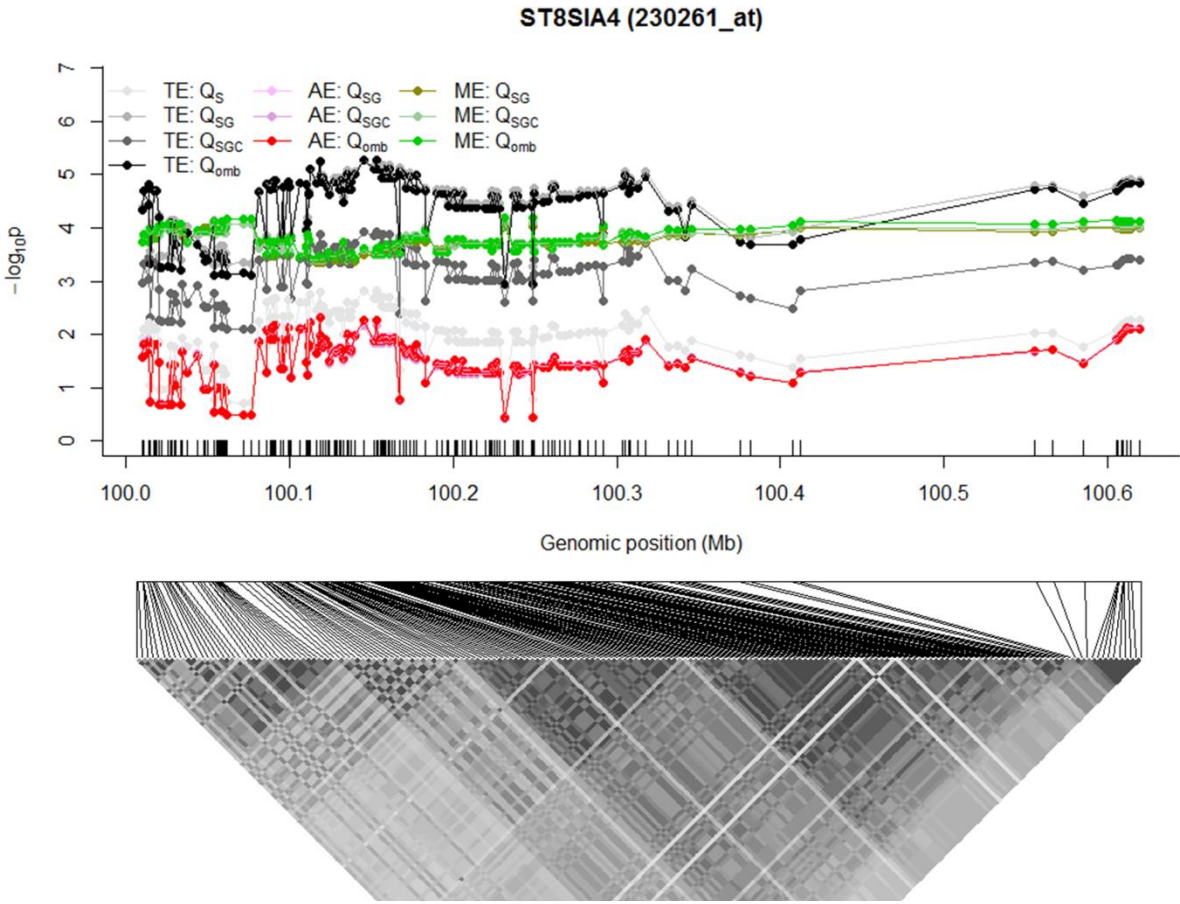

Figure S8. Plots of p-values from different tests in single-locus analyses for *NDFIP1*. Abbreviations and notations are the same as those in Figure S1.

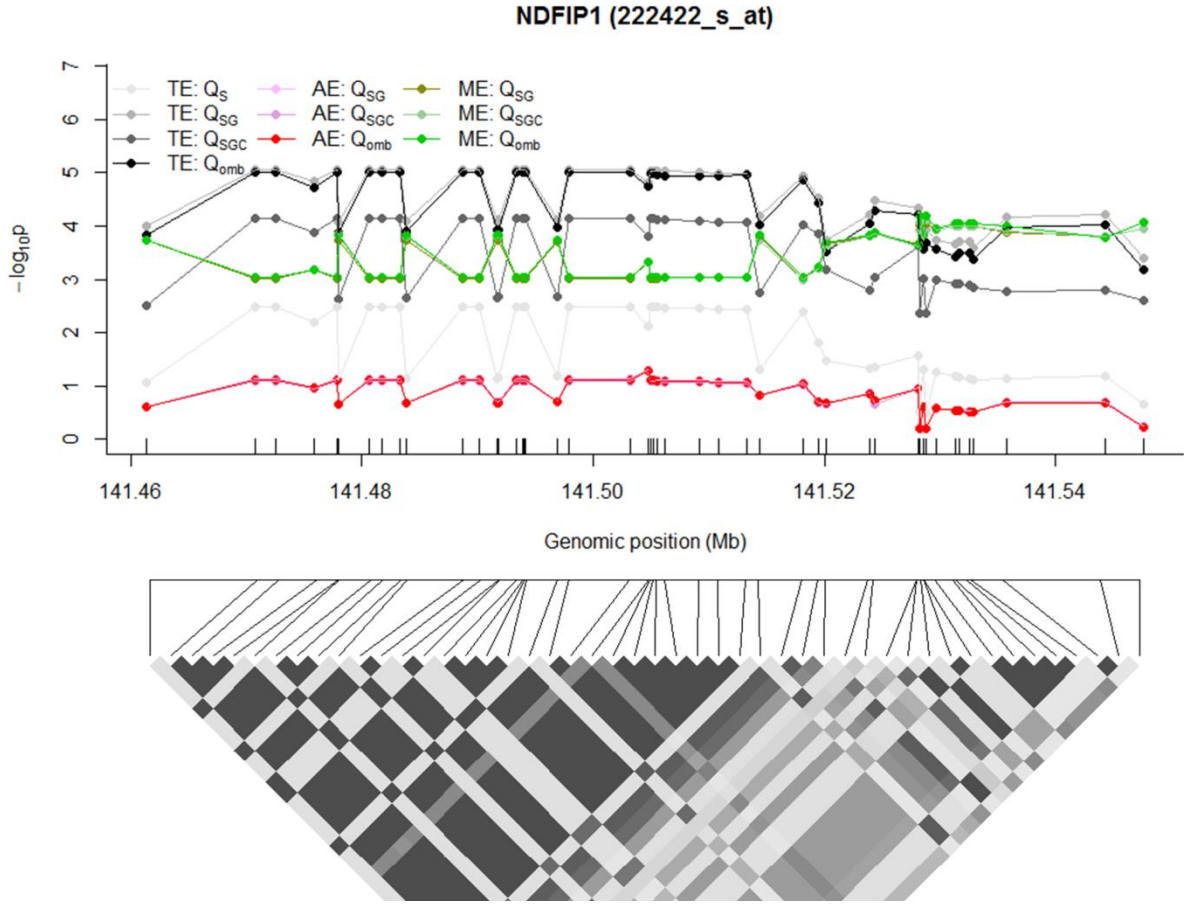

Figure S9. Plots of p-values from different tests in single-locus analyses for *MANEA* (1554193\_s\_at). Abbreviations and notations are the same as those in Figure S1.

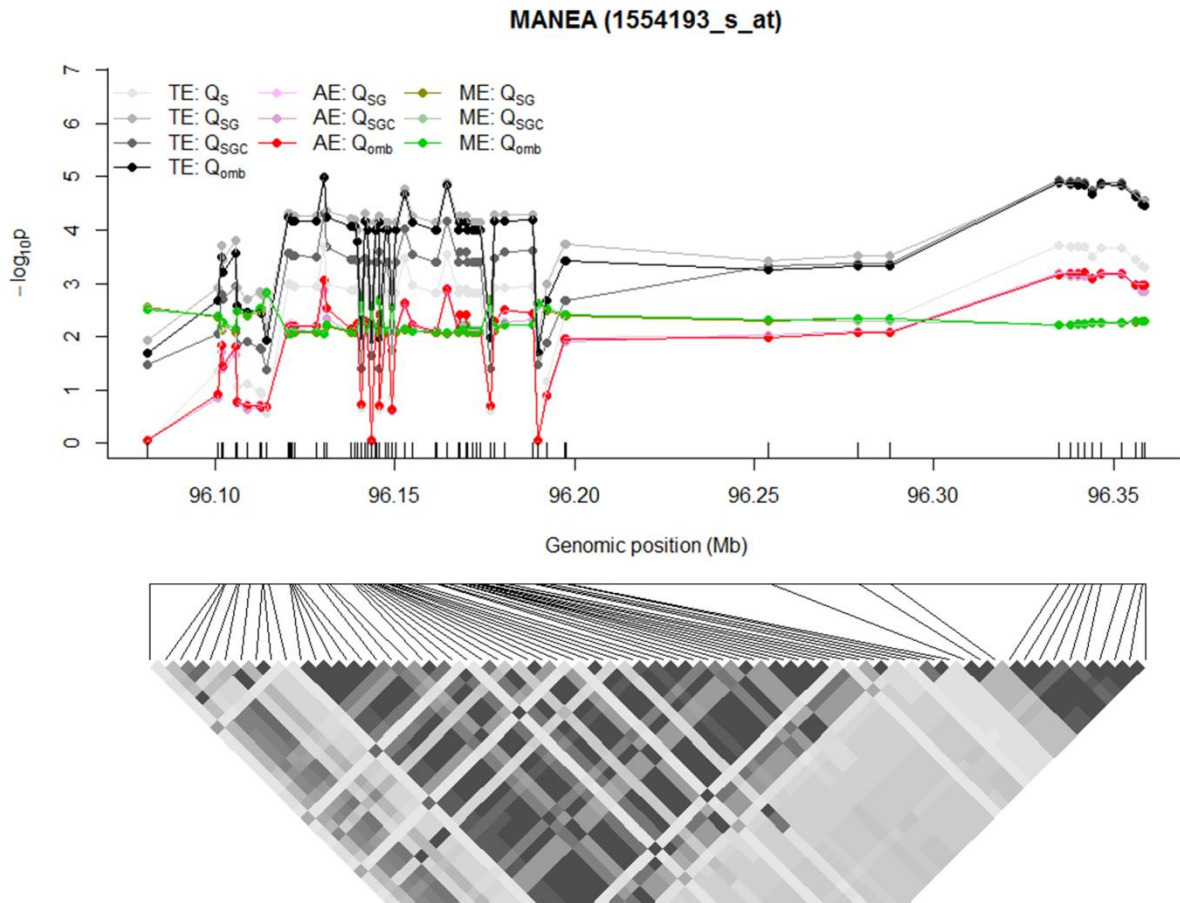



Figure S10. Plots of p-values from different tests in single-locus analyses for 229319\_at. Abbreviations and notations are the same as those in Figure S1.

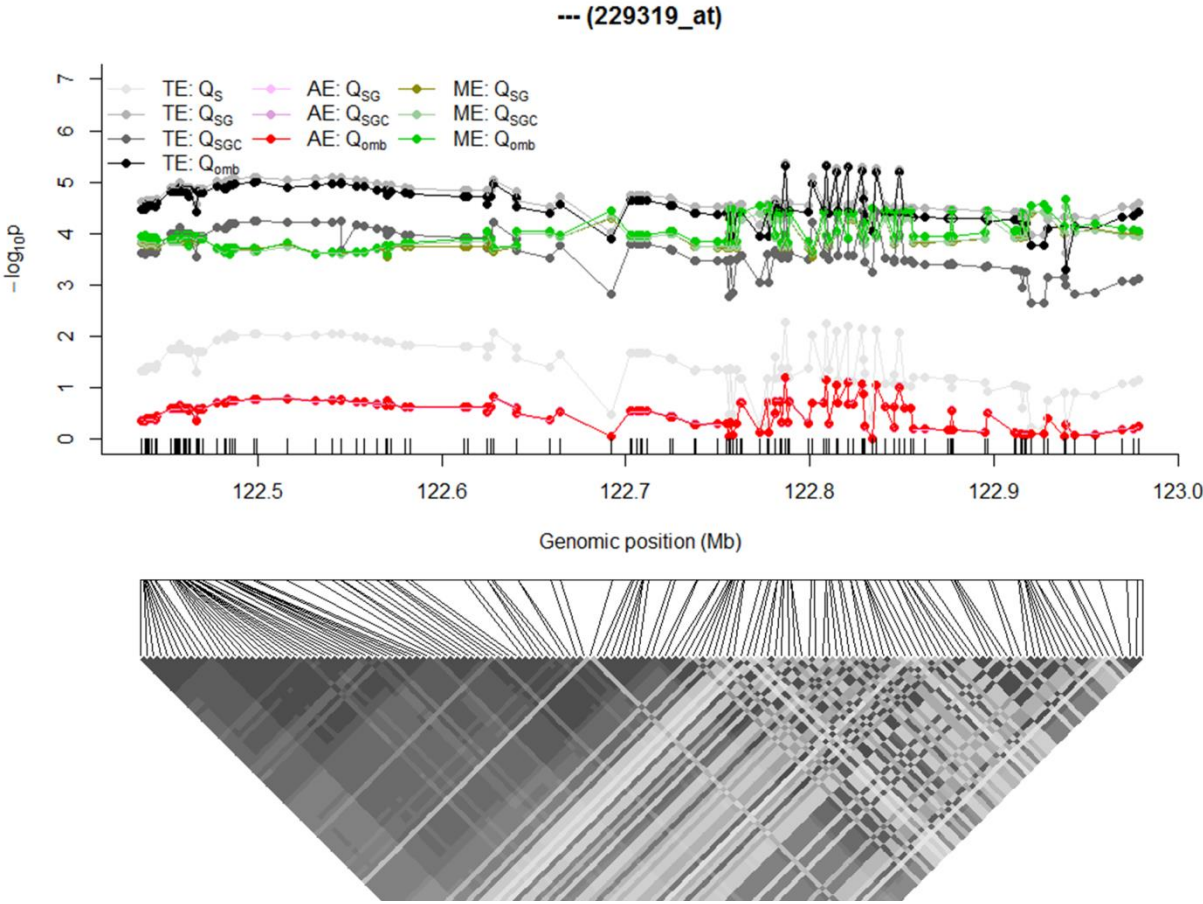



Figure S11. Plots of p-values from different tests in single-locus analyses for *PTCH1*. Abbreviations and notations are the same as those in Figure S1.

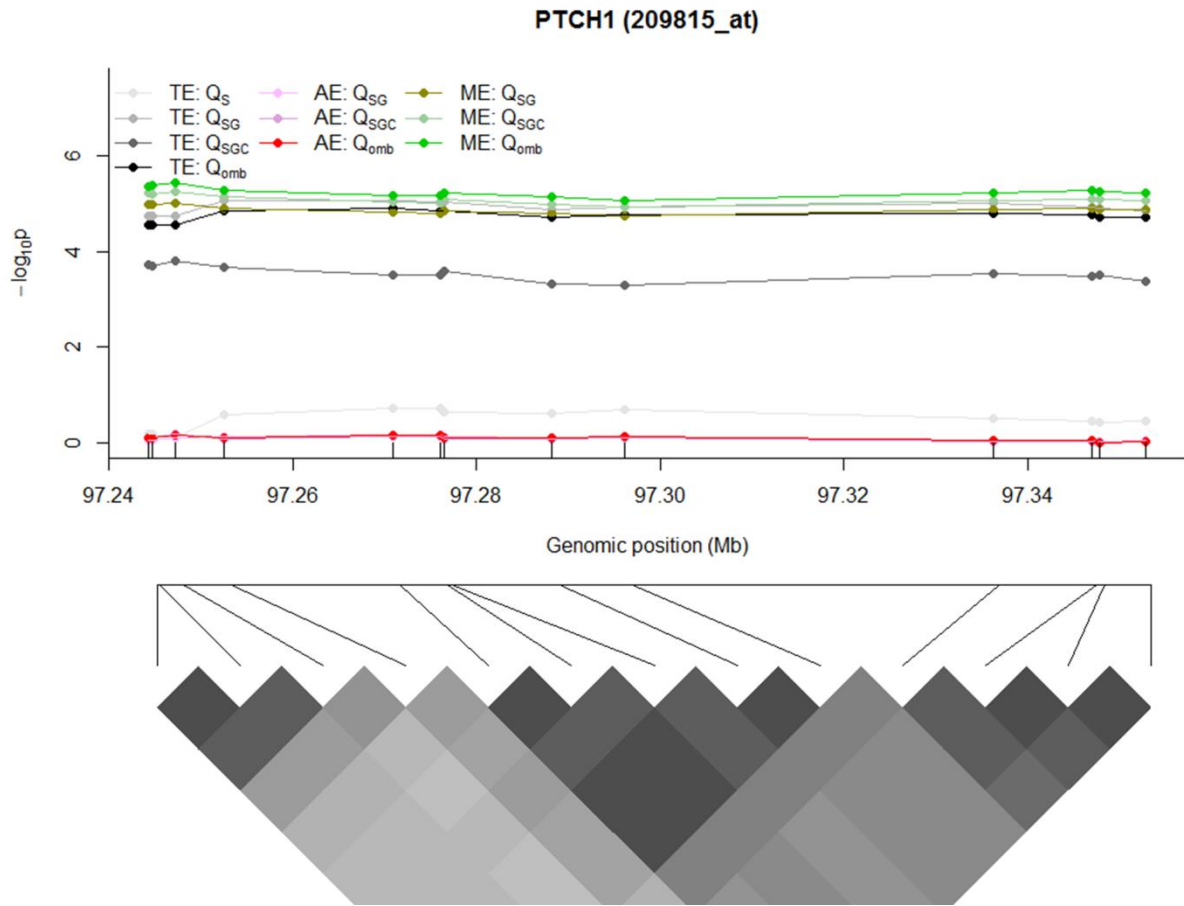

Table S1. Empirical size of iGWAS testing procedure using simulation studies under the family-based design.  $Q_S$ : test with only SNP-set, the SNP-only model;  $Q_{SG}$ : test with both SNP set and gene expression (without interaction), the main effect model;  $Q_{SGC}$ : test with SNP set, gene expression and their cross-product interactions, the full model;  $Q_{omb}$ : omnibus test for  $Q_S$ ,  $Q_{SG}$  and  $Q_{SGC}$ .

| Size                      | $Q_{omb}$ | $Q_S$    | $Q_{SG}$ | $Q_{SGC}$ |
|---------------------------|-----------|----------|----------|-----------|
| <b>Alternative Effect</b> |           |          |          |           |
| 5%                        | 4.45%     | -        | 4.63%    | 4.35%     |
| 0.5%                      | 0.366%    | -        | 0.364%   | 0.306%    |
| 0.05%                     | 0.0246%   | -        | 0.0293%  | 0.0199%   |
| 0.005%                    | 0.00152%  | -        | 0.00084% | 0.00135%  |
| <b>Mediation Effect</b>   |           |          |          |           |
| 5%                        | 4.21%     | -        | 4.34%    | 4.09%     |
| 0.5%                      | 0.361%    | -        | 0.340%   | 0.299%    |
| 0.05%                     | 0.0241%   | -        | 0.0254%  | 0.0214%   |
| 0.005%                    | 0.00118%  | -        | 0.00135% | 0.00084%  |
| <b>Total Effect</b>       |           |          |          |           |
| 5%                        | 4.64%     | 4.55%    | 4.75%    | 4.68%     |
| 0.5%                      | 0.362%    | 0.340%   | 0.397%   | 0.384%    |
| 0.05%                     | 0.0276%   | 0.0256%  | 0.0310%  | 0.0283%   |
| 0.005%                    | 0.00404%  | 0.00354% | 0.00185% | 0.00152%  |

Table S2. P-values of total effect, mediation effect and alternative effect for the 36 genes with most significant mediation effect (FDR <1%) using the asthma data. Symbols and notations are the same as Table 1 in main text.

| Probe        | Gene          | Ch | No. of eQTL | Alternative effect |          |           | Mediation effect |          |           | Total effect |       |          |           |
|--------------|---------------|----|-------------|--------------------|----------|-----------|------------------|----------|-----------|--------------|-------|----------|-----------|
|              |               |    |             | $Q_{omb}$          | $Q_{SG}$ | $Q_{SGC}$ | $Q_{omb}$        | $Q_{SG}$ | $Q_{SGC}$ | $Q_{omb}$    | $Q_S$ | $Q_{SG}$ | $Q_{SGC}$ |
| 218421_at    | <i>CERK</i>   | 22 | 31          | 0.50               | 0.50     | 0.50      | 4.5E-7           | 4.9E-6   | 1.0E-6    | 3.8E-5       | 0.77  | 2.8E-5   | 0.0023    |
| 1553943_at   | <i>NS3BP</i>  | 11 | 21          | 0.69               | 0.68     | 0.68      | 9.1E-7           | 1.8E-5   | 1.6E-6    | 3.9E-4       | 0.61  | 2.8E-4   | 0.0059    |
| 200028_s_at  | <i>STARD7</i> | 2  | 30          | 0.56               | 0.56     | 0.56      | 2.0E-6           | 1.1E-5   | 3.6E-6    | 3.9E-4       | 0.92  | 2.4E-4   | 0.0043    |
| 213689_x_at  | <i>FAM69A</i> | 1  | 23          | 0.53               | 0.52     | 0.52      | 2.1E-6           | 1.1E-5   | 3.2E-6    | 4.4E-5       | 0.30  | 2.7E-5   | 0.0013    |
| 210638_s_at  | <i>FBXO9</i>  | 6  | 13          | 0.43               | 0.42     | 0.43      | 3.3E-6           | 1.8E-5   | 5.1E-6    | 4.1E-4       | 0.52  | 2.4E-4   | 0.0050    |
| 216044_x_at  | <i>FAM69A</i> | 1  | 18          | 0.44               | 0.43     | 0.43      | 3.4E-6           | 1.3E-5   | 4.4E-6    | 2.1E-4       | 0.24  | 1.2E-4   | 0.0023    |
| 203416_at    | <i>CD53</i>   | 1  | 30          | 0.46               | 0.46     | 0.46      | 3.4E-6           | 3.6E-5   | 6.1E-6    | 0.0013       | 0.38  | 9.0E-4   | 0.011     |
| 235168_at    | <i>PIGM</i>   | 1  | 8           | 0.72               | 0.71     | 0.72      | 8.1E-6           | 1.5E-5   | 9.2E-6    | 3.7E-4       | 0.91  | 2.2E-4   | 0.0041    |
| 204950_at    | <i>CARD8</i>  | 19 | 67          | 0.011              | 0.011    | 0.010     | 8.7E-6           | 4.9E-5   | 1.3E-5    | 0.0025       | 0.16  | 0.0016   | 0.018     |
| 1552790_a_at | <i>TLOC1</i>  | 3  | 55          | 0.65               | 0.64     | 0.66      | 9.2E-6           | 2.5E-5   | 1.2E-5    | 2.5E-4       | 0.74  | 1.8E-4   | 0.0048    |
| 209815_at    | <i>PTCH1</i>  | 9  | 13          | 0.92               | 0.91     | 0.93      | 1.2E-5           | 1.8E-5   | 1.3E-5    | 1.6E-5       | 0.32  | 8.5E-6   | 2.3E-4    |
| 225558_at    | <i>GIT2</i>   | 12 | 51          | 0.94               | 0.94     | 0.94      | 1.3E-5           | 2.3E-5   | 1.9E-5    | 4.9E-4       | 0.70  | 2.6E-4   | 0.0032    |
| 228099_at    | <i>ZNF550</i> | 19 | 21          | 0.70               | 0.71     | 0.69      | 1.6E-5           | 7.3E-5   | 2.3E-5    | 4.7E-4       | 0.24  | 2.8E-4   | 0.0041    |
| 214109_at    | <i>LRBA</i>   | 4  | 151         | 0.75               | 0.74     | 0.76      | 1.7E-5           | 7.9E-5   | 2.3E-5    | 6.7E-4       | 0.18  | 4.8E-4   | 0.0021    |

|             |                 |    |     |       |       |       |        |        |        |        |       |        |        |
|-------------|-----------------|----|-----|-------|-------|-------|--------|--------|--------|--------|-------|--------|--------|
| 219035_s_at | <i>RNF34</i>    | 12 | 8   | 0.93  | 0.92  | 0.93  | 1.7E-5 | 4.4E-5 | 2.2E-5 | 0.0012 | 0.94  | 7.6E-4 | 0.010  |
| 227565_at   | ---             | 4  | 4   | 0.15  | 0.17  | 0.14  | 1.8E-5 | 5.0E-5 | 2.2E-5 | 0.0023 | 0.38  | 0.0014 | 0.0032 |
| 227045_at   | <i>ZNF614</i>   | 19 | 50  | 0.11  | 0.11  | 0.11  | 1.9E-5 | 5.0E-5 | 2.4E-5 | 1.9E-4 | 0.16  | 1.4E-4 | 9.2E-4 |
| 235291_s_at | <i>FLJ32255</i> | 5  | 46  | 0.057 | 0.055 | 0.060 | 2.1E-5 | 5.4E-5 | 2.9E-5 | 7.7E-4 | 0.15  | 5.0E-4 | 0.0068 |
| 225666_at   | <i>TMTC4</i>    | 13 | 97  | 0.40  | 0.40  | 0.40  | 2.2E-5 | 4.5E-5 | 3.0E-5 | 0.0061 | 0.99  | 0.0040 | 0.024  |
| 225429_at   | <i>PPP6C</i>    | 9  | 272 | 0.59  | 0.61  | 0.58  | 2.2E-5 | 7.0E-5 | 3.4E-5 | 0.0015 | 0.50  | 0.0010 | 0.0054 |
| 214085_x_at | <i>GLIPR1</i>   | 12 | 148 | 0.059 | 0.056 | 0.063 | 2.4E-5 | 8.5E-5 | 3.2E-5 | 0.0015 | 0.36  | 0.0010 | 0.0094 |
| 229123_at   | <i>ZNF225</i>   | 19 | 22  | 0.48  | 0.47  | 0.48  | 2.4E-5 | 5.2E-5 | 3.0E-5 | 0.0013 | 0.99  | 0.0010 | 0.012  |
| 241017_at   | <i>TBC1D8</i>   | 2  | 28  | 0.58  | 0.57  | 0.61  | 2.9E-5 | 8.7E-5 | 3.9E-5 | 2.5E-4 | 0.13  | 1.8E-4 | 9.0E-4 |
| 206099_at   | <i>PRKCH</i>    | 14 | 2   | 0.60  | 0.59  | 0.65  | 3.1E-5 | 3.9E-5 | 3.2E-5 | 2.5E-4 | 0.65  | 1.4E-4 | 0.0016 |
| 213491_x_at | <i>RPN2</i>     | 20 | 15  | 0.62  | 0.64  | 0.62  | 3.2E-5 | 8.2E-5 | 4.5E-5 | 0.0011 | 0.78  | 0.0010 | 0.015  |
| 224818_at   | <i>SORT1</i>    | 1  | 79  | 0.038 | 0.039 | 0.036 | 3.2E-5 | 6.9E-5 | 5.0E-5 | 0.0031 | 0.29  | 0.0022 | 0.0080 |
| 215693_x_at | <i>DDX27</i>    | 20 | 20  | 0.16  | 0.16  | 0.16  | 3.3E-5 | 8.1E-5 | 4.7E-5 | 8.1E-4 | 0.40  | 5.0E-4 | 0.0064 |
| 225327_at   | <i>KIAA1370</i> | 15 | 85  | 0.59  | 0.61  | 0.58  | 3.4E-5 | 5.6E-5 | 4.7E-5 | 1.6E-4 | 0.70  | 1.0E-4 | 0.0021 |
| 208180_s_at | <i>HIST1H4H</i> | 6  | 29  | 0.081 | 0.083 | 0.077 | 3.8E-5 | 8.9E-5 | 4.8E-5 | 0.0025 | 0.32  | 0.0014 | 0.0063 |
| 202395_at   | <i>NSF</i>      | 17 | 638 | 0.72  | 0.71  | 0.71  | 4.0E-5 | 7.2E-5 | 6.1E-5 | 7.9E-4 | 0.65  | 4.0E-4 | 0.0035 |
| 227178_at   | <i>CUGBP2</i>   | 10 | 25  | 0.12  | 0.13  | 0.12  | 4.1E-5 | 1.0E-4 | 5.8E-5 | 0.0012 | 0.20  | 8.2E-4 | 0.010  |
| 235531_at   | ---             | 3  | 5   | 0.57  | 0.56  | 0.58  | 4.3E-5 | 6.9E-5 | 4.7E-5 | 5.7E-4 | 0.86  | 3.0E-4 | 0.0051 |
| 202763_at   | <i>CASP3</i>    | 4  | 105 | 0.19  | 0.19  | 0.19  | 4.5E-5 | 1.0E-4 | 6.3E-5 | 5.3E-4 | 0.064 | 3.6E-4 | 0.0033 |
| 208732_at   | <i>RAB2A</i>    | 8  | 152 | 0.40  | 0.39  | 0.42  | 5.3E-5 | 1.2E-4 | 7.6E-5 | 0.0019 | 0.48  | 0.0010 | 0.0094 |

|           |               |    |    |      |      |      |        |        |        |        |      |        |        |
|-----------|---------------|----|----|------|------|------|--------|--------|--------|--------|------|--------|--------|
| 238164_at | <i>USP6NL</i> | 10 | 2  | 0.46 | 0.45 | 0.48 | 5.3E-5 | 5.2E-5 | 6.1E-5 | 4.1E-4 | 0.69 | 2.2E-4 | 0.0044 |
| 204642_at | <i>EDG1</i>   | 1  | 19 | 0.56 | 0.55 | 0.57 | 5.4E-5 | 1.1E-4 | 6.8E-5 | 2.1E-4 | 0.30 | 1.2E-4 | 0.0030 |

---

Table S3. P-values of total effect, mediation effect and alternative effect for the top 10 genes with most significant alternative effect (FDR  $\leq 67\%$ ) using the asthma data. Symbols and notations are the same as Table 1 in main text.

| Probe        | Gene           | Ch | No. of eQTL | Alternative effect |          |           | Mediation effect |          |           | Total effect |        |          |           |
|--------------|----------------|----|-------------|--------------------|----------|-----------|------------------|----------|-----------|--------------|--------|----------|-----------|
|              |                |    |             | $Q_{omb}$          | $Q_{SG}$ | $Q_{SGC}$ | $Q_{omb}$        | $Q_{SG}$ | $Q_{SGC}$ | $Q_{omb}$    | $Q_S$  | $Q_{SG}$ | $Q_{SGC}$ |
| 225074_at    | <i>RAB2B</i>   | 14 | 16          | 1.5E-4             | 1.4E-4   | 1.4E-4    | 0.33             | 0.28     | 0.41      | 2.3E-4       | 1.6E-4 | 2.8E-4   | 1.4E-4    |
| 213875_x_at  | <i>C6orf62</i> | 6  | 3           | 1.9E-4             | 1.8E-4   | 2.0E-4    | 0.34             | 0.27     | 0.51      | 1.5E-4       | 1.2E-4 | 1.0E-4   | 1.4E-4    |
| 219003_s_at  | <i>MANEA</i>   | 6  | 159         | 2.9E-4             | 2.6E-4   | 2.8E-4    | 0.0079           | 0.0076   | 0.0082    | 4.8E-7       | 2.1E-6 | 2.9E-7   | 2.8E-7    |
| 209932_s_at  | <i>DUT</i>     | 15 | 2           | 3.5E-4             | 3.4E-4   | 3.4E-4    | 0.38             | 0.31     | 0.47      | 5.3E-4       | 3.8E-4 | 4.2E-4   | 6.6E-4    |
| 1555241_at   | <i>C8orf59</i> | 8  | 203         | 3.9E-4             | 3.4E-4   | 3.8E-4    | 0.0011           | 0.0012   | 0.0012    | 0.0015       | 0.012  | 0.0068   | 0.001     |
| 218191_s_at  | <i>LMBRD1</i>  | 6  | 89          | 5.1E-4             | 5.2E-4   | 5.2E-4    | 0.0055           | 0.0054   | 0.0054    | 1.2E-4       | 0.0011 | 9.6E-5   | 2.3E-4    |
| 225523_at    | <i>MRPL53</i>  | 2  | 175         | 5.7E-4             | 5.8E-4   | 6.2E-4    | 0.055            | 0.053    | 0.060     | 1.9E-6       | 1.0E-5 | 5.2E-6   | 1.0E-6    |
| 1555227_a_at | <i>MANEA</i>   | 6  | 79          | 7.5E-4             | 6.8E-4   | 0.001     | 0.088            | 0.082    | 0.085     | 3.8E-5       | 2.3E-5 | 3.3E-5   | 2.0E-5    |
| 204836_at    | <i>GLDC</i>    | 9  | 33          | 8.3E-4             | 9.6E-4   | 7.2E-4    | 0.011            | 0.010    | 0.011     | 0.0037       | 0.0032 | 0.0084   | 0.0022    |
| 208809_s_at  | <i>C6orf62</i> | 6  | 19          | 9.0E-4             | 0.001    | 0.001     | 0.050            | 0.043    | 0.075     | 3.5E-4       | 7.8E-4 | 2.6E-4   | 2.4E-4    |

Table S4. Single-locus analyses for eQTL SNPs of *MANEA* (219003\_s\_at). (Ch: chromosome; ME: mediation effect; AE: alternative effect; CI: confidence interval).

| SNP        | Ch | Location (Mb) | ME   | 95% CI |      | P-value | AE   | 95% CI |      | P-value | Proportion Of Mediation |
|------------|----|---------------|------|--------|------|---------|------|--------|------|---------|-------------------------|
| rs2613562  | 6  | 95.995        | 1.04 | 1.01   | 1.08 | 0.01    | 1.59 | 1.08   | 2.24 | 0.014   | 0.098                   |
| rs6938032  | 6  | 95.996        | 1.05 | 1.02   | 1.09 | 0.003   | 1.57 | 1.1    | 2.1  | 0.007   | 0.118                   |
| rs9322578  | 6  | 95.998        | 1.05 | 1.02   | 1.08 | 0.002   | 1.54 | 1.09   | 2.05 | 0.008   | 0.119                   |
| rs9399724  | 6  | 95.999        | 1.05 | 1.02   | 1.08 | 0.002   | 1.53 | 1.09   | 2.04 | 0.008   | 0.119                   |
| rs2613565  | 6  | 96.001        | 1.04 | 1.01   | 1.08 | 0.009   | 1.53 | 1.05   | 2.14 | 0.018   | 0.105                   |
| rs2380224  | 6  | 96.002        | 1.14 | 1.01   | 1.35 | 0.08    | 1.85 | 0.85   | 2.84 | 0.058   | 0.237                   |
| rs2716074  | 6  | 96.014        | 1.14 | 1.01   | 1.35 | 0.081   | 1.84 | 0.85   | 2.82 | 0.058   | 0.236                   |
| rs2613547  | 6  | 96.017        | 1.14 | 1.01   | 1.35 | 0.081   | 1.84 | 0.86   | 2.81 | 0.058   | 0.236                   |
| rs2716070  | 6  | 96.019        | 1.14 | 1.01   | 1.35 | 0.081   | 1.84 | 0.86   | 2.81 | 0.058   | 0.235                   |
| rs2716069  | 6  | 96.02         | 1.14 | 1.01   | 1.35 | 0.081   | 1.84 | 0.86   | 2.81 | 0.058   | 0.235                   |
| rs2613551  | 6  | 96.021        | 1.14 | 1.01   | 1.35 | 0.081   | 1.84 | 0.86   | 2.81 | 0.058   | 0.236                   |
| rs7776189  | 6  | 96.023        | 1.05 | 1.02   | 1.08 | 0.003   | 1.54 | 1.09   | 2.06 | 0.007   | 0.119                   |
| rs2613553  | 6  | 96.023        | 1.14 | 1.01   | 1.35 | 0.081   | 1.84 | 0.86   | 2.81 | 0.058   | 0.235                   |
| rs9322786  | 6  | 96.024        | 1.05 | 1.02   | 1.08 | 0.003   | 1.54 | 1.09   | 2.06 | 0.007   | 0.119                   |
| rs10498994 | 6  | 96.038        | 0.93 | 0.86   | 0.98 | 0.042   | 0.85 | 0.47   | 1.17 | 0.499   | 0.281                   |
| rs877096   | 6  | 96.044        | 1.14 | 1.01   | 1.35 | 0.081   | 1.84 | 0.86   | 2.82 | 0.058   | 0.236                   |
| rs9486300  | 6  | 96.045        | 1.05 | 1.02   | 1.08 | 0.003   | 1.55 | 1.09   | 2.06 | 0.007   | 0.119                   |
| rs2613528  | 6  | 96.046        | 1.14 | 1.01   | 1.35 | 0.081   | 1.84 | 0.86   | 2.82 | 0.058   | 0.236                   |
| rs10046249 | 6  | 96.049        | 1.05 | 1.02   | 1.08 | 0.003   | 1.55 | 1.09   | 2.06 | 0.007   | 0.119                   |
| rs9386595  | 6  | 96.052        | 0.97 | 0.94   | 0.99 | 0.014   | 0.76 | 0.45   | 1.06 | 0.222   | 0.1                     |
| rs2386670  | 6  | 96.053        | 1.05 | 1.02   | 1.08 | 0.003   | 1.55 | 1.09   | 2.06 | 0.007   | 0.119                   |
| rs6939947  | 6  | 96.058        | 1.05 | 1.02   | 1.08 | 0.003   | 1.55 | 1.09   | 2.06 | 0.007   | 0.119                   |
| rs7449934  | 6  | 96.059        | 0.95 | 0.9    | 0.99 | 0.024   | 0.79 | 0.48   | 1.09 | 0.277   | 0.16                    |
| rs9400133  | 6  | 96.059        | 1.05 | 1.02   | 1.08 | 0.003   | 1.55 | 1.09   | 2.06 | 0.007   | 0.119                   |
| rs7757160  | 6  | 96.061        | 1.05 | 1.02   | 1.08 | 0.003   | 1.55 | 1.09   | 2.06 | 0.007   | 0.119                   |
| rs6939353  | 6  | 96.065        | 1.05 | 1.02   | 1.09 | 0.003   | 1.55 | 1.09   | 2.06 | 0.007   | 0.119                   |
| rs4535556  | 6  | 96.068        | 1.05 | 1.02   | 1.09 | 0.003   | 1.55 | 1.09   | 2.06 | 0.007   | 0.119                   |
| rs9386748  | 6  | 96.07         | 1.05 | 1.02   | 1.09 | 0.006   | 1.47 | 1.03   | 2.13 | 0.031   | 0.134                   |
| rs2380220  | 6  | 96.074        | 1.1  | 1      | 1.25 | 0.072   | 1.83 | 0.93   | 2.93 | 0.045   | 0.186                   |
| rs2890372  | 6  | 96.075        | 1.04 | 1.02   | 1.07 | 0.003   | 1.58 | 1.12   | 2.11 | 0.004   | 0.091                   |
| rs4270788  | 6  | 96.076        | 1.1  | 1      | 1.23 | 0.075   | 1.84 | 0.92   | 2.95 | 0.041   | 0.175                   |
| rs729278   | 6  | 96.076        | 1.04 | 1.02   | 1.06 | 0.003   | 1.58 | 1.13   | 2.12 | 0.004   | 0.089                   |
| rs6931299  | 6  | 96.077        | 1.09 | 1      | 1.22 | 0.078   | 1.84 | 0.94   | 2.94 | 0.04    | 0.168                   |
| rs6923253  | 6  | 96.077        | 1.08 | 1      | 1.2  | 0.085   | 1.83 | 0.95   | 2.96 | 0.039   | 0.153                   |
| rs9374107  | 6  | 96.078        | 1.03 | 1.01   | 1.06 | 0.003   | 1.58 | 1.13   | 2.12 | 0.004   | 0.083                   |
| rs9400318  | 6  | 96.079        | 1.08 | 0.99   | 1.18 | 0.092   | 1.83 | 0.95   | 2.97 | 0.039   | 0.142                   |
| rs13196543 | 6  | 96.081        | 0.97 | 0.93   | 0.99 | 0.069   | 0.8  | 0.02   | 1.84 | 0.884   | 0.106                   |
| rs2380222  | 6  | 96.082        | 1.06 | 0.99   | 1.14 | 0.109   | 1.81 | 0.94   | 2.93 | 0.043   | 0.118                   |

|            |   |        |      |      |      |       |      |      |      |       |        |
|------------|---|--------|------|------|------|-------|------|------|------|-------|--------|
| rs9386880  | 6 | 96.083 | 1.03 | 1.01 | 1.05 | 0.003 | 1.58 | 1.13 | 2.14 | 0.004 | 0.076  |
| rs6568636  | 6 | 96.085 | 1    | 1    | 1.01 | 0.015 | 1.61 | 1.11 | 2.25 | 0.009 | 0.008  |
| rs9374178  | 6 | 96.087 | 1.07 | 1.01 | 1.16 | 0.061 | 1.57 | 0.89 | 2.33 | 0.065 | 0.167  |
| rs9374179  | 6 | 96.087 | 0.96 | 0.91 | 0.99 | 0.03  | 0.76 | 0.43 | 1.06 | 0.228 | 0.121  |
| rs9400397  | 6 | 96.087 | 1.07 | 1.01 | 1.16 | 0.059 | 1.57 | 0.89 | 2.32 | 0.063 | 0.167  |
| rs9384792  | 6 | 96.095 | 1.03 | 1.02 | 1.06 | 0.002 | 1.49 | 1.06 | 2.01 | 0.016 | 0.095  |
| rs4448101  | 6 | 96.095 | 1.02 | 1.01 | 1.05 | 0.011 | 1.5  | 1.02 | 2.09 | 0.029 | 0.067  |
| rs4546494  | 6 | 96.097 | 1.06 | 0.99 | 1.13 | 0.123 | 1.73 | 0.85 | 2.88 | 0.077 | 0.117  |
| rs7754906  | 6 | 96.099 | 1.07 | 1.01 | 1.16 | 0.056 | 1.37 | 0.8  | 2    | 0.202 | 0.21   |
| rs9481199  | 6 | 96.101 | 0.99 | 0.98 | 1    | 0.085 | 1.2  | 0.76 | 1.73 | 0.431 | -0.052 |
| rs9320386  | 6 | 96.102 | 1.06 | 0.99 | 1.14 | 0.133 | 1.76 | 0.86 | 2.92 | 0.069 | 0.116  |
| rs7744714  | 6 | 96.102 | 1.04 | 1.02 | 1.08 | 0.004 | 1.34 | 0.95 | 1.87 | 0.093 | 0.14   |
| rs4435952  | 6 | 96.102 | 1.05 | 1.02 | 1.08 | 0.004 | 1.31 | 0.91 | 1.86 | 0.147 | 0.164  |
| rs7750757  | 6 | 96.104 | 1.07 | 0.99 | 1.16 | 0.114 | 1.94 | 0.99 | 3.29 | 0.028 | 0.121  |
| rs7766765  | 6 | 96.104 | 1.07 | 1    | 1.15 | 0.087 | 1.36 | 0.76 | 2.03 | 0.215 | 0.197  |
| rs9400526  | 6 | 96.105 | 1.07 | 1    | 1.15 | 0.088 | 1.36 | 0.76 | 2.03 | 0.213 | 0.196  |
| rs11153357 | 6 | 96.105 | 0.96 | 0.92 | 0.98 | 0.012 | 0.75 | 0.42 | 1.06 | 0.225 | 0.112  |
| rs9374321  | 6 | 96.106 | 1.04 | 1.02 | 1.08 | 0.006 | 1.34 | 0.91 | 1.88 | 0.117 | 0.141  |
| rs9487909  | 6 | 96.106 | 0.98 | 0.95 | 1.02 | 0.366 | 1.38 | 0.75 | 2.11 | 0.267 | -0.067 |
| rs4560656  | 6 | 96.106 | 1.05 | 1.02 | 1.09 | 0.005 | 1.44 | 1.03 | 2.03 | 0.038 | 0.139  |
| rs9400554  | 6 | 96.107 | 1.05 | 1.02 | 1.09 | 0.005 | 1.44 | 1.03 | 2.03 | 0.038 | 0.139  |
| rs7748857  | 6 | 96.109 | 1.07 | 0.99 | 1.17 | 0.13  | 2.01 | 1.03 | 3.35 | 0.024 | 0.119  |
| rs7749364  | 6 | 96.109 | 0.99 | 0.99 | 1    | 0.093 | 1.13 | 0.71 | 1.65 | 0.582 | -0.059 |
| rs9487975  | 6 | 96.11  | 1.01 | 1    | 1.02 | 0.009 | 1.26 | 0.84 | 1.75 | 0.207 | 0.052  |
| rs9488059  | 6 | 96.113 | 0.98 | 0.95 | 1.02 | 0.372 | 1.36 | 0.73 | 2.03 | 0.299 | -0.072 |
| rs9488061  | 6 | 96.113 | 0.98 | 0.94 | 1.02 | 0.376 | 1.34 | 0.72 | 2.02 | 0.317 | -0.076 |
| rs10735717 | 6 | 96.114 | 1.09 | 1.01 | 1.21 | 0.064 | 1.68 | 0.94 | 2.53 | 0.033 | 0.18   |
| rs10782175 | 6 | 96.114 | 1.09 | 1.03 | 1.17 | 0.008 | 1.86 | 1.26 | 2.69 | 0.001 | 0.164  |
| rs7748108  | 6 | 96.115 | 1.09 | 1.01 | 1.2  | 0.051 | 1.82 | 1.1  | 2.7  | 0.008 | 0.166  |
| rs4308568  | 6 | 96.116 | 1.1  | 1.01 | 1.24 | 0.078 | 2.18 | 1.14 | 3.51 | 0.005 | 0.155  |
| rs9398365  | 6 | 96.12  | 1.05 | 1.02 | 1.09 | 0.006 | 1.43 | 0.99 | 2.03 | 0.05  | 0.14   |
| rs9372382  | 6 | 96.121 | 1.05 | 1.02 | 1.09 | 0.006 | 1.43 | 0.99 | 2.03 | 0.05  | 0.14   |
| rs9398367  | 6 | 96.121 | 1.05 | 1.02 | 1.09 | 0.006 | 1.43 | 0.99 | 2.03 | 0.051 | 0.139  |
| rs6932267  | 6 | 96.121 | 1.05 | 1.02 | 1.09 | 0.006 | 1.43 | 0.99 | 2.02 | 0.053 | 0.139  |
| rs9488308  | 6 | 96.122 | 1.05 | 1.02 | 1.09 | 0.006 | 1.43 | 0.99 | 2.01 | 0.053 | 0.138  |
| rs9320497  | 6 | 96.128 | 1.05 | 1.02 | 1.09 | 0.006 | 1.42 | 0.99 | 2.01 | 0.054 | 0.138  |
| rs6937479  | 6 | 96.13  | 1.05 | 1.02 | 1.1  | 0.005 | 1.56 | 1.12 | 2.18 | 0.01  | 0.13   |
| rs9374502  | 6 | 96.131 | 1.05 | 1.02 | 1.08 | 0.004 | 1.49 | 1.07 | 2.08 | 0.023 | 0.124  |
| rs9384949  | 6 | 96.138 | 1.05 | 1.02 | 1.08 | 0.006 | 1.42 | 0.99 | 1.99 | 0.057 | 0.136  |
| rs9387352  | 6 | 96.139 | 1.05 | 1.02 | 1.08 | 0.006 | 1.41 | 0.99 | 1.99 | 0.057 | 0.136  |
| rs7758062  | 6 | 96.14  | 1.04 | 1.01 | 1.07 | 0.007 | 1.41 | 0.98 | 2.04 | 0.067 | 0.116  |
| rs9374586  | 6 | 96.142 | 1.04 | 1.01 | 1.07 | 0.007 | 1.42 | 0.99 | 2.04 | 0.065 | 0.107  |
| rs6940020  | 6 | 96.143 | 1.05 | 1.02 | 1.08 | 0.006 | 1.41 | 0.99 | 1.98 | 0.06  | 0.136  |



|            |   |        |      |      |      |       |      |      |      |       |        |
|------------|---|--------|------|------|------|-------|------|------|------|-------|--------|
| rs9400893  | 6 | 96.145 | 1.05 | 1.02 | 1.08 | 0.006 | 1.41 | 0.99 | 1.98 | 0.06  | 0.136  |
| rs9372457  | 6 | 96.145 | 1.05 | 1.02 | 1.08 | 0.006 | 1.41 | 0.99 | 1.98 | 0.06  | 0.136  |
| rs9488910  | 6 | 96.146 | 1.05 | 1.02 | 1.09 | 0.004 | 1.47 | 1.06 | 2.06 | 0.026 | 0.127  |
| rs9320566  | 6 | 96.148 | 1.05 | 1.02 | 1.08 | 0.006 | 1.41 | 0.99 | 1.98 | 0.06  | 0.136  |
| rs7773709  | 6 | 96.148 | 1.05 | 1.02 | 1.08 | 0.006 | 1.41 | 0.99 | 1.98 | 0.06  | 0.136  |
| rs4498363  | 6 | 96.149 | 1.1  | 1    | 1.25 | 0.075 | 2.24 | 1.18 | 3.62 | 0.004 | 0.158  |
| rs7757276  | 6 | 96.149 | 0.98 | 0.95 | 1.02 | 0.37  | 1.33 | 0.7  | 2    | 0.329 | -0.075 |
| rs4466257  | 6 | 96.15  | 1.05 | 1.02 | 1.08 | 0.006 | 1.41 | 0.99 | 1.98 | 0.06  | 0.136  |
| rs9387442  | 6 | 96.153 | 1.06 | 1.02 | 1.11 | 0.007 | 1.7  | 1.1  | 2.48 | 0.01  | 0.121  |
| rs4486026  | 6 | 96.155 | 1.05 | 1.02 | 1.08 | 0.006 | 1.45 | 1.01 | 2.03 | 0.038 | 0.126  |
| rs1133503  | 6 | 96.161 | 1.05 | 1.02 | 1.08 | 0.006 | 1.41 | 0.99 | 1.98 | 0.06  | 0.136  |
| rs9387522  | 6 | 96.162 | 1.05 | 1.02 | 1.08 | 0.006 | 1.41 | 0.99 | 1.98 | 0.06  | 0.136  |
| rs9387567  | 6 | 96.165 | 1.05 | 1.02 | 1.1  | 0.005 | 1.54 | 1.1  | 2.14 | 0.011 | 0.135  |
| rs9387591  | 6 | 96.168 | 1.05 | 1.02 | 1.08 | 0.006 | 1.41 | 0.99 | 1.98 | 0.06  | 0.136  |
| rs4339467  | 6 | 96.168 | 1.05 | 1.02 | 1.08 | 0.004 | 1.47 | 1.05 | 2.06 | 0.026 | 0.127  |
| rs9387601  | 6 | 96.17  | 1.05 | 1.02 | 1.08 | 0.004 | 1.47 | 1.05 | 2.06 | 0.026 | 0.127  |
| rs9387603  | 6 | 96.17  | 1.05 | 1.02 | 1.08 | 0.006 | 1.41 | 0.99 | 1.98 | 0.06  | 0.136  |
| rs9387605  | 6 | 96.17  | 1.05 | 1.02 | 1.08 | 0.006 | 1.41 | 0.99 | 1.98 | 0.06  | 0.136  |
| rs9489578  | 6 | 96.172 | 1.05 | 1.02 | 1.08 | 0.006 | 1.41 | 0.99 | 1.98 | 0.06  | 0.136  |
| rs7774322  | 6 | 96.173 | 1.05 | 1.02 | 1.08 | 0.006 | 1.41 | 0.99 | 1.98 | 0.06  | 0.136  |
| rs12333032 | 6 | 96.174 | 1.05 | 1.02 | 1.08 | 0.006 | 1.41 | 0.99 | 1.98 | 0.06  | 0.136  |
| rs9481950  | 6 | 96.178 | 1.04 | 1.01 | 1.07 | 0.007 | 1.42 | 0.99 | 2.06 | 0.065 | 0.106  |
| rs6926916  | 6 | 96.181 | 1.05 | 1.02 | 1.08 | 0.004 | 1.48 | 1.06 | 2.08 | 0.025 | 0.125  |
| rs6937569  | 6 | 96.188 | 1.05 | 1.02 | 1.08 | 0.004 | 1.49 | 1.06 | 2.11 | 0.024 | 0.122  |
| rs4413619  | 6 | 96.19  | 0.98 | 0.93 | 0.99 | 0.131 | 0.78 | 0    | 1.5  | 0.903 | 0.08   |
| rs4579361  | 6 | 96.191 | 0.94 | 0.82 | 0.98 | 0.184 | 0.87 | 0    | 1.62 | 0.944 | 0.277  |
| rs4074107  | 6 | 96.192 | 0.94 | 0.81 | 0.98 | 0.188 | 0.86 | 0    | 1.62 | 0.945 | 0.285  |
| rs9490118  | 6 | 96.192 | 0.99 | 0.96 | 1.02 | 0.356 | 1.44 | 0.74 | 2.21 | 0.228 | -0.046 |
| rs9490131  | 6 | 96.193 | 0.97 | 0.93 | 0.99 | 0.02  | 0.65 | 0.38 | 0.93 | 0.06  | 0.057  |
| rs7767166  | 6 | 96.195 | 0.96 | 0.93 | 0.99 | 0.017 | 0.71 | 0.42 | 1.01 | 0.126 | 0.084  |
| rs12525999 | 6 | 96.197 | 1.02 | 0.99 | 1.05 | 0.212 | 1.72 | 0.97 | 2.56 | 0.038 | 0.044  |
| rs12529535 | 6 | 96.198 | 1.02 | 0.99 | 1.05 | 0.211 | 1.72 | 0.97 | 2.56 | 0.038 | 0.044  |
| rs9398717  | 6 | 96.212 | 0.97 | 0.93 | 0.99 | 0.018 | 0.7  | 0.42 | 1    | 0.123 | 0.076  |
| rs9375221  | 6 | 96.213 | 0.97 | 0.93 | 0.99 | 0.018 | 0.7  | 0.42 | 1    | 0.122 | 0.076  |
| rs9401648  | 6 | 96.214 | 0.97 | 0.93 | 0.99 | 0.018 | 0.7  | 0.42 | 0.99 | 0.122 | 0.076  |
| rs9320938  | 6 | 96.216 | 1.03 | 1.01 | 1.07 | 0.035 | 1.62 | 0.91 | 2.33 | 0.04  | 0.078  |
| rs9482561  | 6 | 96.226 | 0.97 | 0.93 | 0.99 | 0.018 | 0.71 | 0.43 | 0.99 | 0.121 | 0.076  |
| rs11154243 | 6 | 96.226 | 0.97 | 0.93 | 0.99 | 0.018 | 0.71 | 0.43 | 0.99 | 0.121 | 0.076  |
| rs9375380  | 6 | 96.231 | 0.97 | 0.93 | 0.99 | 0.018 | 0.71 | 0.43 | 0.99 | 0.121 | 0.076  |
| rs7740900  | 6 | 96.234 | 0.97 | 0.93 | 0.99 | 0.019 | 0.7  | 0.42 | 0.99 | 0.12  | 0.075  |
| rs7764473  | 6 | 96.234 | 0.97 | 0.93 | 0.99 | 0.019 | 0.7  | 0.42 | 0.99 | 0.119 | 0.075  |
| rs4535555  | 6 | 96.25  | 0.95 | 0.9  | 0.99 | 0.033 | 0.7  | 0.42 | 0.97 | 0.112 | 0.102  |
| rs11758159 | 6 | 96.254 | 0.94 | 0.87 | 0.98 | 0.026 | 0.68 | 0.4  | 0.92 | 0.077 | 0.119  |

|            |   |        |      |      |      |       |      |      |      |       |       |
|------------|---|--------|------|------|------|-------|------|------|------|-------|-------|
| rs6913326  | 6 | 96.256 | 0.95 | 0.9  | 0.99 | 0.032 | 0.7  | 0.42 | 0.96 | 0.102 | 0.099 |
| rs13215970 | 6 | 96.256 | 0.94 | 0.9  | 0.98 | 0.011 | 0.62 | 0.4  | 0.85 | 0.02  | 0.086 |
| rs4382270  | 6 | 96.266 | 0.95 | 0.9  | 0.99 | 0.031 | 0.69 | 0.42 | 0.95 | 0.093 | 0.098 |
| rs6933408  | 6 | 96.267 | 0.95 | 0.9  | 0.99 | 0.034 | 0.69 | 0.41 | 0.95 | 0.093 | 0.098 |
| rs9388655  | 6 | 96.267 | 0.95 | 0.9  | 0.99 | 0.034 | 0.69 | 0.41 | 0.95 | 0.093 | 0.098 |
| rs9482958  | 6 | 96.271 | 0.95 | 0.9  | 0.99 | 0.034 | 0.69 | 0.41 | 0.95 | 0.092 | 0.098 |
| rs12662075 | 6 | 96.279 | 0.94 | 0.88 | 0.98 | 0.025 | 0.67 | 0.4  | 0.91 | 0.065 | 0.113 |
| rs9388798  | 6 | 96.287 | 0.95 | 0.9  | 0.99 | 0.031 | 0.69 | 0.42 | 0.95 | 0.092 | 0.097 |
| rs7765615  | 6 | 96.288 | 0.94 | 0.88 | 0.98 | 0.025 | 0.67 | 0.4  | 0.91 | 0.065 | 0.112 |
| rs9321246  | 6 | 96.288 | 0.95 | 0.9  | 0.99 | 0.031 | 0.69 | 0.42 | 0.95 | 0.091 | 0.097 |
| rs11757682 | 6 | 96.291 | 0.95 | 0.9  | 0.99 | 0.025 | 0.64 | 0.35 | 0.91 | 0.071 | 0.08  |
| rs12213767 | 6 | 96.292 | 0.95 | 0.9  | 0.99 | 0.033 | 0.68 | 0.41 | 0.95 | 0.089 | 0.098 |
| rs9388907  | 6 | 96.297 | 0.95 | 0.89 | 0.99 | 0.036 | 0.67 | 0.39 | 0.94 | 0.084 | 0.1   |
| rs7743203  | 6 | 96.31  | 1.05 | 0.99 | 1.12 | 0.127 | 1.73 | 0.96 | 2.49 | 0.028 | 0.101 |
| rs9389160  | 6 | 96.325 | 0.93 | 0.85 | 1    | 0.088 | 0.67 | 0.36 | 0.95 | 0.103 | 0.116 |
| rs9493940  | 6 | 96.326 | 0.93 | 0.85 | 1    | 0.089 | 0.67 | 0.36 | 0.95 | 0.102 | 0.116 |
| rs13212315 | 6 | 96.333 | 0.94 | 0.89 | 0.97 | 0.005 | 0.51 | 0.32 | 0.7  | 0.001 | 0.061 |
| rs4840033  | 6 | 96.335 | 0.93 | 0.87 | 0.97 | 0.011 | 0.58 | 0.37 | 0.8  | 0.006 | 0.087 |
| rs13203167 | 6 | 96.336 | 0.94 | 0.89 | 0.97 | 0.005 | 0.51 | 0.33 | 0.71 | 0.001 | 0.062 |
| rs17774669 | 6 | 96.338 | 0.93 | 0.87 | 0.97 | 0.011 | 0.58 | 0.37 | 0.8  | 0.006 | 0.088 |
| rs12530302 | 6 | 96.34  | 0.93 | 0.87 | 0.97 | 0.011 | 0.58 | 0.37 | 0.8  | 0.006 | 0.088 |
| rs13206934 | 6 | 96.342 | 0.93 | 0.87 | 0.97 | 0.011 | 0.58 | 0.38 | 0.81 | 0.006 | 0.089 |
| rs12200752 | 6 | 96.344 | 0.94 | 0.89 | 0.98 | 0.011 | 0.59 | 0.39 | 0.82 | 0.007 | 0.079 |
| rs1857482  | 6 | 96.346 | 0.93 | 0.87 | 0.97 | 0.011 | 0.58 | 0.38 | 0.81 | 0.006 | 0.09  |
| rs9494535  | 6 | 96.347 | 0.94 | 0.89 | 0.98 | 0.011 | 0.59 | 0.39 | 0.82 | 0.007 | 0.08  |
| rs13205985 | 6 | 96.352 | 0.93 | 0.87 | 0.97 | 0.011 | 0.59 | 0.39 | 0.81 | 0.006 | 0.091 |
| rs9494669  | 6 | 96.353 | 0.94 | 0.89 | 0.98 | 0.011 | 0.59 | 0.39 | 0.82 | 0.007 | 0.081 |
| rs9494677  | 6 | 96.353 | 0.94 | 0.89 | 0.98 | 0.011 | 0.59 | 0.39 | 0.82 | 0.007 | 0.081 |
| rs11154931 | 6 | 96.356 | 0.94 | 0.89 | 0.97 | 0.005 | 0.52 | 0.33 | 0.71 | 0.001 | 0.065 |
| rs10872473 | 6 | 96.356 | 0.93 | 0.87 | 0.97 | 0.011 | 0.59 | 0.38 | 0.83 | 0.009 | 0.094 |
| rs9321610  | 6 | 96.356 | 0.94 | 0.89 | 0.98 | 0.011 | 0.59 | 0.38 | 0.83 | 0.009 | 0.082 |
| rs4493748  | 6 | 96.358 | 0.93 | 0.87 | 0.97 | 0.011 | 0.59 | 0.37 | 0.84 | 0.011 | 0.095 |
| rs13203882 | 6 | 96.359 | 0.93 | 0.87 | 0.97 | 0.011 | 0.59 | 0.37 | 0.84 | 0.012 | 0.095 |
| rs9399238  | 6 | 96.366 | 0.94 | 0.89 | 0.98 | 0.011 | 0.59 | 0.37 | 0.85 | 0.014 | 0.083 |
| rs9321670  | 6 | 96.368 | 0.94 | 0.89 | 0.98 | 0.011 | 0.59 | 0.37 | 0.85 | 0.014 | 0.083 |

Table S5. Single-locus analyses for eQTL SNPs of *MRPL53*. (Ch: chromosome; ME: mediation effect; AE: alternative effect; CI: confidence interval).

| SNP        | Ch | Location (Mb) | ME   | 95% CI |      | P-value | AE   | 95% CI |      | P-value | Proportion Of Mediation |
|------------|----|---------------|------|--------|------|---------|------|--------|------|---------|-------------------------|
| rs6739466  | 2  | 74.27         | 0.74 | 0.45   | 1.09 | 0.174   | 0.56 | 0.03   | 1.44 | 0.589   | 0.245                   |
| rs17009735 | 2  | 74.283        | 0.75 | 0.46   | 1.08 | 0.175   | 0.56 | 0.03   | 1.37 | 0.589   | 0.245                   |
| rs13385639 | 2  | 74.285        | 0.75 | 0.46   | 1.08 | 0.175   | 0.56 | 0.03   | 1.37 | 0.588   | 0.245                   |
| rs10199560 | 2  | 74.297        | 0.75 | 0.46   | 1.07 | 0.17    | 0.56 | 0.03   | 1.38 | 0.586   | 0.246                   |
| rs6745054  | 2  | 74.304        | 0.94 | 0.86   | 1.01 | 0.137   | 1.01 | 0.37   | 1.58 | 0.989   | 1.1                     |
| rs7565640  | 2  | 74.307        | 0.73 | 0.46   | 1.02 | 0.129   | 0.52 | 0.03   | 1.32 | 0.532   | 0.225                   |
| rs3796109  | 2  | 74.314        | 0.68 | 0.43   | 0.96 | 0.075   | 0.39 | 0.02   | 1.13 | 0.43    | 0.17                    |
| rs872293   | 2  | 74.332        | 0.6  | 0.31   | 0.9  | 0.072   | 0.27 | 0      | 0.93 | 0.514   | 0.127                   |
| rs6734233  | 2  | 74.338        | 0.88 | 0.76   | 0.96 | 0.036   | 0.58 | 0.24   | 0.99 | 0.153   | 0.138                   |
| rs3771724  | 2  | 74.339        | 0.88 | 0.76   | 0.96 | 0.036   | 0.58 | 0.24   | 1    | 0.145   | 0.137                   |
| rs1006502  | 2  | 74.34         | 0.89 | 0.77   | 0.96 | 0.035   | 0.58 | 0.25   | 0.99 | 0.135   | 0.136                   |
| rs3755438  | 2  | 74.342        | 0.89 | 0.78   | 0.96 | 0.033   | 0.57 | 0.26   | 0.93 | 0.101   | 0.125                   |
| rs11897130 | 2  | 74.349        | 0.9  | 0.79   | 0.97 | 0.031   | 0.58 | 0.27   | 0.94 | 0.095   | 0.124                   |
| rs10169443 | 2  | 74.352        | 0.9  | 0.8    | 0.97 | 0.03    | 0.58 | 0.29   | 0.93 | 0.091   | 0.124                   |
| rs7593190  | 2  | 74.353        | 0.9  | 0.8    | 0.97 | 0.03    | 0.59 | 0.29   | 0.94 | 0.09    | 0.123                   |
| rs3771727  | 2  | 74.357        | 0.9  | 0.8    | 0.97 | 0.03    | 0.59 | 0.29   | 0.94 | 0.089   | 0.123                   |
| rs7560244  | 2  | 74.369        | 0.94 | 0.85   | 1.01 | 0.207   | 0.92 | 0.36   | 1.69 | 0.862   | 0.409                   |
| rs7575147  | 2  | 74.369        | 0.9  | 0.79   | 0.97 | 0.036   | 0.64 | 0.29   | 1.08 | 0.214   | 0.156                   |
| rs3771731  | 2  | 74.37         | 0.73 | 0.43   | 0.95 | 0.114   | 0.27 | 0.01   | 0.67 | 0.265   | 0.091                   |
| rs2191309  | 2  | 74.371        | 0.73 | 0.44   | 0.95 | 0.113   | 0.29 | 0.01   | 0.69 | 0.272   | 0.097                   |
| rs3771733  | 2  | 74.375        | 0.73 | 0.44   | 0.95 | 0.119   | 0.28 | 0.01   | 0.68 | 0.27    | 0.095                   |
| rs3771735  | 2  | 74.381        | 0.55 | 0.11   | 0.82 | 0.336   | 0.19 | 0      | 0.79 | 0.895   | 0.092                   |
| rs3771737  | 2  | 74.385        | 0.56 | 0.11   | 0.83 | 0.339   | 0.19 | 0      | 0.8  | 0.897   | 0.092                   |
| rs9309483  | 2  | 74.385        | 0.91 | 0.81   | 0.97 | 0.053   | 0.59 | 0.18   | 1    | 0.275   | 0.119                   |
| rs10182348 | 2  | 74.386        | 0.98 | 0.94   | 1    | 0.171   | 0.63 | 0.11   | 1.13 | 0.496   | 0.038                   |
| rs9789404  | 2  | 74.388        | 0.98 | 0.93   | 1    | 0.171   | 0.63 | 0.12   | 1.13 | 0.497   | 0.039                   |
| rs2421844  | 2  | 74.394        | 0.97 | 0.93   | 1    | 0.171   | 0.63 | 0.12   | 1.13 | 0.497   | 0.041                   |
| rs3771738  | 2  | 74.394        | 0.98 | 0.93   | 1    | 0.175   | 0.78 | 0.16   | 1.37 | 0.67    | 0.079                   |
| rs10185658 | 2  | 74.396        | 0.91 | 0.8    | 0.97 | 0.058   | 0.6  | 0.2    | 0.99 | 0.277   | 0.123                   |
| rs11126430 | 2  | 74.398        | 0.91 | 0.8    | 0.97 | 0.059   | 0.6  | 0.2    | 0.99 | 0.277   | 0.123                   |
| rs7567768  | 2  | 74.401        | 0.97 | 0.93   | 1    | 0.17    | 0.63 | 0.11   | 1.14 | 0.496   | 0.045                   |
| rs10211612 | 2  | 74.402        | 0.91 | 0.8    | 0.97 | 0.06    | 0.6  | 0.2    | 1    | 0.277   | 0.124                   |
| rs7571411  | 2  | 74.402        | 0.97 | 0.93   | 1    | 0.171   | 0.78 | 0.16   | 1.37 | 0.67    | 0.086                   |
| rs3771740  | 2  | 74.408        | 0.97 | 0.92   | 1    | 0.168   | 0.64 | 0.12   | 1.16 | 0.493   | 0.049                   |
| rs3755440  | 2  | 74.414        | 0.97 | 0.92   | 1    | 0.166   | 0.78 | 0.17   | 1.39 | 0.668   | 0.093                   |
| rs13387588 | 2  | 74.416        | 0.97 | 0.92   | 1    | 0.166   | 0.64 | 0.12   | 1.16 | 0.491   | 0.05                    |
| rs3771741  | 2  | 74.418        | 0.97 | 0.92   | 1    | 0.16    | 0.79 | 0.18   | 1.39 | 0.667   | 0.099                   |
| rs2098128  | 2  | 74.419        | 0.91 | 0.81   | 0.97 | 0.061   | 0.62 | 0.22   | 0.99 | 0.274   | 0.127                   |

|            |   |        |      |      |      |       |      |      |      |       |        |
|------------|---|--------|------|------|------|-------|------|------|------|-------|--------|
| rs7592599  | 2 | 74.419 | 0.97 | 0.92 | 1    | 0.156 | 0.79 | 0.19 | 1.39 | 0.665 | 0.102  |
| rs6546902  | 2 | 74.42  | 0.91 | 0.81 | 0.97 | 0.061 | 0.62 | 0.22 | 0.99 | 0.274 | 0.127  |
| rs3821303  | 2 | 74.421 | 0.97 | 0.92 | 1    | 0.156 | 0.65 | 0.14 | 1.16 | 0.481 | 0.056  |
| rs12151688 | 2 | 74.422 | 0.6  | 0.12 | 0.9  | 0.623 | 0.24 | 0    | 0.85 | 0.983 | 0.11   |
| rs3755441  | 2 | 74.423 | 0.97 | 0.92 | 1    | 0.145 | 0.8  | 0.21 | 1.38 | 0.66  | 0.11   |
| rs3755442  | 2 | 74.424 | 0.97 | 0.92 | 1    | 0.151 | 0.66 | 0.15 | 1.17 | 0.476 | 0.058  |
| rs3755443  | 2 | 74.424 | 0.97 | 0.92 | 1    | 0.15  | 0.66 | 0.15 | 1.17 | 0.474 | 0.059  |
| rs3771742  | 2 | 74.424 | 0.97 | 0.92 | 1    | 0.14  | 0.8  | 0.22 | 1.38 | 0.657 | 0.113  |
| rs6714954  | 2 | 74.426 | 0.97 | 0.92 | 1    | 0.14  | 0.8  | 0.22 | 1.38 | 0.657 | 0.113  |
| rs6732913  | 2 | 74.426 | 0.97 | 0.92 | 1    | 0.146 | 0.66 | 0.15 | 1.16 | 0.471 | 0.06   |
| rs6546903  | 2 | 74.427 | 0.97 | 0.92 | 1    | 0.137 | 0.8  | 0.22 | 1.38 | 0.657 | 0.115  |
| rs7581836  | 2 | 74.431 | 0.97 | 0.92 | 0.99 | 0.144 | 0.67 | 0.16 | 1.16 | 0.468 | 0.061  |
| rs3771744  | 2 | 74.432 | 0.92 | 0.82 | 0.98 | 0.059 | 0.64 | 0.25 | 0.99 | 0.266 | 0.129  |
| rs6546904  | 2 | 74.433 | 0.94 | 0.83 | 1.01 | 0.253 | 0.73 | 0.19 | 1.3  | 0.559 | 0.13   |
| rs3771747  | 2 | 74.437 | 0.97 | 0.92 | 0.99 | 0.126 | 0.8  | 0.23 | 1.38 | 0.642 | 0.117  |
| rs9309484  | 2 | 74.44  | 0.97 | 0.91 | 0.99 | 0.12  | 0.65 | 0.16 | 1.14 | 0.425 | 0.061  |
| rs741788   | 2 | 74.443 | 0.97 | 0.92 | 0.99 | 0.11  | 0.79 | 0.23 | 1.38 | 0.605 | 0.114  |
| rs909177   | 2 | 74.449 | 0.97 | 0.92 | 0.99 | 0.101 | 0.79 | 0.24 | 1.38 | 0.587 | 0.113  |
| rs740277   | 2 | 74.451 | 0.96 | 0.9  | 0.99 | 0.103 | 0.78 | 0.23 | 1.37 | 0.587 | 0.136  |
| rs2075743  | 2 | 74.456 | 1.08 | 1    | 1.22 | 0.171 | 0.32 | 0    | 0.73 | 0.494 | -0.037 |
| rs3213672  | 2 | 74.458 | 1.08 | 1    | 1.22 | 0.171 | 0.32 | 0.01 | 0.73 | 0.493 | -0.036 |
| rs3815241  | 2 | 74.458 | 1.07 | 1    | 1.21 | 0.171 | 0.32 | 0.01 | 0.73 | 0.49  | -0.035 |
| rs3771748  | 2 | 74.46  | 0.94 | 0.85 | 0.99 | 0.103 | 0.64 | 0.17 | 1.15 | 0.366 | 0.1    |
| rs6713611  | 2 | 74.465 | 0.94 | 0.86 | 0.99 | 0.098 | 0.78 | 0.24 | 1.35 | 0.575 | 0.182  |
| rs6745355  | 2 | 74.466 | 0.94 | 0.85 | 0.99 | 0.102 | 0.64 | 0.17 | 1.14 | 0.362 | 0.104  |
| rs6740802  | 2 | 74.47  | 0.92 | 0.8  | 0.98 | 0.115 | 0.62 | 0.15 | 1.08 | 0.325 | 0.115  |
| rs7570851  | 2 | 74.472 | 0.92 | 0.8  | 0.98 | 0.107 | 0.77 | 0.23 | 1.36 | 0.535 | 0.209  |
| rs12328744 | 2 | 74.473 | 0.92 | 0.79 | 0.98 | 0.115 | 0.63 | 0.17 | 1.09 | 0.325 | 0.126  |
| rs12328185 | 2 | 74.475 | 0.91 | 0.79 | 0.98 | 0.104 | 0.63 | 0.18 | 1.09 | 0.312 | 0.13   |
| rs17009922 | 2 | 74.476 | 0.91 | 0.79 | 0.98 | 0.104 | 0.78 | 0.26 | 1.36 | 0.543 | 0.229  |
| rs6751601  | 2 | 74.478 | 0.91 | 0.78 | 0.98 | 0.116 | 0.64 | 0.18 | 1.09 | 0.329 | 0.133  |
| rs9309485  | 2 | 74.491 | 0.87 | 0.73 | 0.96 | 0.055 | 0.61 | 0.23 | 1    | 0.199 | 0.168  |
| rs10187051 | 2 | 74.493 | 0.87 | 0.73 | 0.96 | 0.055 | 0.62 | 0.24 | 1    | 0.201 | 0.172  |
| rs10187076 | 2 | 74.493 | 0.87 | 0.73 | 0.96 | 0.055 | 0.62 | 0.24 | 1.01 | 0.202 | 0.174  |
| rs2240444  | 2 | 74.495 | 0.87 | 0.73 | 0.96 | 0.055 | 0.62 | 0.24 | 1.01 | 0.204 | 0.176  |
| rs2268424  | 2 | 74.502 | 0.87 | 0.73 | 0.96 | 0.04  | 0.73 | 0.32 | 1.21 | 0.349 | 0.261  |
| rs2268420  | 2 | 74.508 | 0.89 | 0.7  | 1.03 | 0.252 | 0.71 | 0.14 | 1.33 | 0.632 | 0.212  |
| rs2268421  | 2 | 74.508 | 0.87 | 0.72 | 0.96 | 0.059 | 0.61 | 0.23 | 1    | 0.19  | 0.168  |
| rs2268418  | 2 | 74.518 | 0.87 | 0.72 | 0.96 | 0.051 | 0.63 | 0.25 | 1.01 | 0.196 | 0.184  |
| rs11694367 | 2 | 74.519 | 0.86 | 0.73 | 0.95 | 0.037 | 0.73 | 0.33 | 1.21 | 0.331 | 0.267  |
| rs11695896 | 2 | 74.52  | 0.86 | 0.73 | 0.95 | 0.037 | 0.73 | 0.33 | 1.2  | 0.327 | 0.267  |
| rs7556852  | 2 | 74.523 | 0.9  | 0.79 | 0.96 | 0.028 | 0.86 | 0.43 | 1.3  | 0.59  | 0.391  |
| rs7562663  | 2 | 74.53  | 0.87 | 0.72 | 0.96 | 0.055 | 0.62 | 0.23 | 1.02 | 0.198 | 0.181  |

|            |   |        |      |      |      |       |      |      |      |       |       |
|------------|---|--------|------|------|------|-------|------|------|------|-------|-------|
| rs6746854  | 2 | 74.535 | 0.87 | 0.71 | 0.96 | 0.065 | 0.6  | 0.21 | 0.99 | 0.183 | 0.165 |
| rs2268417  | 2 | 74.536 | 0.87 | 0.73 | 0.97 | 0.063 | 0.63 | 0.25 | 1    | 0.197 | 0.176 |
| rs2270016  | 2 | 74.54  | 0.88 | 0.74 | 0.97 | 0.066 | 0.64 | 0.28 | 1    | 0.197 | 0.176 |
| rs1063588  | 2 | 74.544 | 0.89 | 0.77 | 0.98 | 0.061 | 0.71 | 0.35 | 1.11 | 0.267 | 0.214 |
| rs2284708  | 2 | 74.546 | 0.89 | 0.76 | 0.98 | 0.072 | 0.66 | 0.3  | 1    | 0.202 | 0.177 |
| rs1047911  | 2 | 74.553 | 0.89 | 0.77 | 0.98 | 0.061 | 0.71 | 0.35 | 1.11 | 0.267 | 0.214 |
| rs6707475  | 2 | 74.564 | 0.89 | 0.76 | 0.98 | 0.072 | 0.66 | 0.3  | 1.01 | 0.205 | 0.178 |
| rs17009980 | 2 | 74.573 | 0.89 | 0.76 | 0.98 | 0.061 | 0.71 | 0.34 | 1.11 | 0.267 | 0.214 |
| rs2301984  | 2 | 74.575 | 0.89 | 0.76 | 0.98 | 0.071 | 0.66 | 0.3  | 1    | 0.198 | 0.176 |
| rs3755445  | 2 | 74.576 | 0.89 | 0.76 | 0.98 | 0.071 | 0.66 | 0.3  | 1    | 0.194 | 0.175 |
| rs3755446  | 2 | 74.576 | 0.89 | 0.75 | 0.98 | 0.071 | 0.65 | 0.3  | 1    | 0.192 | 0.175 |
| rs10454145 | 2 | 74.579 | 0.88 | 0.75 | 0.97 | 0.059 | 0.69 | 0.33 | 1.11 | 0.241 | 0.207 |
| rs17009998 | 2 | 74.579 | 0.89 | 0.75 | 0.97 | 0.06  | 0.7  | 0.33 | 1.11 | 0.245 | 0.208 |
| rs11688069 | 2 | 74.58  | 0.88 | 0.75 | 0.97 | 0.059 | 0.69 | 0.32 | 1.1  | 0.236 | 0.205 |
| rs11676323 | 2 | 74.583 | 0.88 | 0.75 | 0.97 | 0.059 | 0.69 | 0.32 | 1.1  | 0.235 | 0.205 |
| rs2240443  | 2 | 74.586 | 0.87 | 0.73 | 0.97 | 0.053 | 0.7  | 0.31 | 1.16 | 0.304 | 0.232 |
| rs3806607  | 2 | 74.589 | 0.88 | 0.74 | 0.98 | 0.075 | 0.61 | 0.27 | 0.97 | 0.145 | 0.154 |
| rs997564   | 2 | 74.591 | 0.73 | 0.31 | 0.98 | 0.391 | 0.13 | 0    | 0.54 | 0.774 | 0.039 |
| rs3755447  | 2 | 74.594 | 0.88 | 0.74 | 0.97 | 0.067 | 0.63 | 0.29 | 0.98 | 0.16  | 0.167 |
| rs3815476  | 2 | 74.599 | 0.94 | 0.78 | 1.01 | 0.367 | 0.28 | 0    | 0.63 | 0.553 | 0.022 |
| rs6546909  | 2 | 74.6   | 0.91 | 0.8  | 1    | 0.119 | 0.53 | 0.26 | 0.82 | 0.038 | 0.09  |
| rs10779958 | 2 | 74.609 | 0.91 | 0.8  | 1    | 0.115 | 0.55 | 0.27 | 0.87 | 0.045 | 0.095 |
| rs2231250  | 2 | 74.61  | 0.91 | 0.8  | 1    | 0.115 | 0.55 | 0.27 | 0.87 | 0.043 | 0.094 |
| rs2241028  | 2 | 74.612 | 0.94 | 0.78 | 1.01 | 0.379 | 0.27 | 0    | 0.63 | 0.577 | 0.021 |
| rs6707302  | 2 | 74.615 | 0.91 | 0.79 | 1    | 0.117 | 0.52 | 0.26 | 0.8  | 0.031 | 0.087 |
| rs715407   | 2 | 74.619 | 0.91 | 0.8  | 0.99 | 0.105 | 0.56 | 0.29 | 0.89 | 0.046 | 0.1   |
| rs11126435 | 2 | 74.643 | 0.93 | 0.8  | 1.01 | 0.253 | 0.34 | 0.12 | 0.55 | 0.035 | 0.035 |
| rs2021725  | 2 | 74.656 | 0.93 | 0.8  | 1.01 | 0.233 | 0.34 | 0.12 | 0.55 | 0.032 | 0.035 |
| rs752070   | 2 | 74.678 | 0.93 | 0.8  | 1.01 | 0.215 | 0.33 | 0.11 | 0.54 | 0.028 | 0.035 |
| rs363691   | 2 | 74.695 | 0.93 | 0.77 | 1.01 | 0.294 | 0.32 | 0.09 | 0.53 | 0.052 | 0.033 |
| rs363697   | 2 | 74.701 | 0.95 | 0.79 | 1.01 | 0.436 | 0.24 | 0    | 0.59 | 0.698 | 0.016 |
| rs205651   | 2 | 74.71  | 0.97 | 0.93 | 0.99 | 0.037 | 0.77 | 0.52 | 1.1  | 0.172 | 0.095 |
| rs6739708  | 2 | 74.719 | 0.92 | 0.79 | 1.01 | 0.21  | 0.31 | 0.11 | 0.5  | 0.024 | 0.033 |
| rs7603085  | 2 | 74.722 | 0.93 | 0.81 | 1    | 0.192 | 0.35 | 0.13 | 0.56 | 0.028 | 0.038 |
| rs6546917  | 2 | 74.727 | 0.92 | 0.8  | 1    | 0.163 | 0.33 | 0.13 | 0.52 | 0.013 | 0.037 |
| rs6718184  | 2 | 74.727 | 0.93 | 0.8  | 1    | 0.186 | 0.35 | 0.13 | 0.56 | 0.025 | 0.038 |
| rs363607   | 2 | 74.75  | 0.92 | 0.8  | 1    | 0.158 | 0.31 | 0.13 | 0.5  | 0.008 | 0.035 |
| rs10200121 | 2 | 74.753 | 0.92 | 0.81 | 1    | 0.125 | 0.34 | 0.14 | 0.53 | 0.006 | 0.039 |
| rs3025991  | 2 | 74.753 | 0.92 | 0.81 | 1    | 0.121 | 0.34 | 0.14 | 0.53 | 0.005 | 0.039 |
| rs205648   | 2 | 74.754 | 0.92 | 0.81 | 1    | 0.118 | 0.34 | 0.15 | 0.54 | 0.004 | 0.039 |
| rs2075214  | 2 | 74.755 | 0.93 | 0.84 | 0.99 | 0.09  | 0.37 | 0.17 | 0.57 | 0.006 | 0.041 |
| rs363608   | 2 | 74.755 | 0.92 | 0.82 | 0.99 | 0.107 | 0.34 | 0.15 | 0.54 | 0.004 | 0.041 |
| rs363609   | 2 | 74.756 | 0.92 | 0.82 | 1    | 0.111 | 0.35 | 0.16 | 0.54 | 0.004 | 0.04  |

|            |   |        |      |      |      |       |      |      |      |       |       |
|------------|---|--------|------|------|------|-------|------|------|------|-------|-------|
| rs13387355 | 2 | 74.757 | 0.92 | 0.82 | 1    | 0.112 | 0.35 | 0.16 | 0.55 | 0.004 | 0.04  |
| rs363610   | 2 | 74.759 | 0.92 | 0.82 | 1    | 0.122 | 0.35 | 0.16 | 0.55 | 0.004 | 0.04  |
| rs363611   | 2 | 74.76  | 0.93 | 0.82 | 1    | 0.131 | 0.36 | 0.16 | 0.57 | 0.005 | 0.04  |
| rs3771749  | 2 | 74.761 | 0.93 | 0.82 | 1    | 0.131 | 0.36 | 0.16 | 0.57 | 0.005 | 0.04  |
| rs3025994  | 2 | 74.762 | 0.93 | 0.82 | 1    | 0.131 | 0.36 | 0.16 | 0.57 | 0.005 | 0.04  |
| rs6716578  | 2 | 74.763 | 0.93 | 0.82 | 1    | 0.131 | 0.36 | 0.16 | 0.57 | 0.005 | 0.04  |
| rs363612   | 2 | 74.765 | 0.93 | 0.82 | 1    | 0.131 | 0.36 | 0.16 | 0.57 | 0.005 | 0.04  |
| rs10183097 | 2 | 74.768 | 0.93 | 0.82 | 1    | 0.134 | 0.36 | 0.16 | 0.56 | 0.005 | 0.039 |
| rs363614   | 2 | 74.769 | 0.93 | 0.82 | 1    | 0.135 | 0.35 | 0.16 | 0.56 | 0.005 | 0.039 |
| rs363647   | 2 | 74.769 | 0.93 | 0.82 | 1    | 0.134 | 0.36 | 0.16 | 0.56 | 0.005 | 0.039 |
| rs2022187  | 2 | 74.77  | 0.93 | 0.82 | 1    | 0.136 | 0.35 | 0.16 | 0.56 | 0.005 | 0.039 |
| rs363615   | 2 | 74.771 | 0.93 | 0.82 | 1    | 0.136 | 0.35 | 0.16 | 0.56 | 0.005 | 0.039 |
| rs363617   | 2 | 74.772 | 0.93 | 0.82 | 1    | 0.135 | 0.35 | 0.16 | 0.56 | 0.005 | 0.039 |
| rs363618   | 2 | 74.773 | 0.93 | 0.82 | 1    | 0.135 | 0.35 | 0.16 | 0.56 | 0.005 | 0.039 |
| rs11691947 | 2 | 74.774 | 0.93 | 0.82 | 1    | 0.138 | 0.35 | 0.16 | 0.56 | 0.005 | 0.039 |
| rs6734139  | 2 | 74.778 | 0.93 | 0.82 | 1    | 0.14  | 0.35 | 0.16 | 0.56 | 0.005 | 0.039 |
| rs363619   | 2 | 74.779 | 0.93 | 0.82 | 1    | 0.14  | 0.35 | 0.16 | 0.56 | 0.005 | 0.039 |
| rs7355739  | 2 | 74.78  | 0.93 | 0.82 | 1    | 0.143 | 0.35 | 0.16 | 0.56 | 0.005 | 0.039 |
| rs2041835  | 2 | 74.781 | 0.93 | 0.82 | 1    | 0.145 | 0.35 | 0.16 | 0.56 | 0.005 | 0.038 |
| rs11126439 | 2 | 74.782 | 0.93 | 0.82 | 1    | 0.146 | 0.35 | 0.16 | 0.56 | 0.005 | 0.038 |
| rs363620   | 2 | 74.782 | 0.93 | 0.82 | 1    | 0.147 | 0.35 | 0.16 | 0.56 | 0.005 | 0.038 |
| rs363621   | 2 | 74.782 | 0.93 | 0.82 | 1    | 0.149 | 0.35 | 0.16 | 0.56 | 0.005 | 0.038 |
| rs11126440 | 2 | 74.783 | 0.93 | 0.82 | 1    | 0.155 | 0.35 | 0.16 | 0.55 | 0.005 | 0.038 |
| rs363622   | 2 | 74.783 | 0.93 | 0.82 | 1    | 0.152 | 0.35 | 0.16 | 0.56 | 0.005 | 0.038 |
| rs363668   | 2 | 74.783 | 0.93 | 0.82 | 1    | 0.152 | 0.35 | 0.16 | 0.56 | 0.005 | 0.038 |
| rs363670   | 2 | 74.783 | 0.93 | 0.82 | 1    | 0.156 | 0.35 | 0.16 | 0.55 | 0.005 | 0.038 |
| rs3026000  | 2 | 74.784 | 0.93 | 0.82 | 1    | 0.157 | 0.35 | 0.16 | 0.55 | 0.005 | 0.037 |
| rs363624   | 2 | 74.784 | 0.93 | 0.82 | 1    | 0.158 | 0.35 | 0.15 | 0.55 | 0.005 | 0.037 |
| rs363625   | 2 | 74.784 | 0.93 | 0.82 | 1    | 0.159 | 0.35 | 0.16 | 0.55 | 0.005 | 0.037 |
| rs363626   | 2 | 74.785 | 0.93 | 0.82 | 1.01 | 0.16  | 0.34 | 0.16 | 0.55 | 0.005 | 0.037 |
| rs363627   | 2 | 74.785 | 0.93 | 0.82 | 1.01 | 0.161 | 0.34 | 0.16 | 0.55 | 0.005 | 0.037 |
| rs363628   | 2 | 74.785 | 0.93 | 0.82 | 1.01 | 0.162 | 0.34 | 0.16 | 0.55 | 0.005 | 0.037 |
| rs363629   | 2 | 74.787 | 0.93 | 0.82 | 1.01 | 0.164 | 0.34 | 0.16 | 0.55 | 0.005 | 0.037 |
| rs363630   | 2 | 74.787 | 0.93 | 0.82 | 1.01 | 0.164 | 0.34 | 0.16 | 0.55 | 0.005 | 0.037 |
| rs363673   | 2 | 74.787 | 0.93 | 0.82 | 1.01 | 0.164 | 0.35 | 0.16 | 0.55 | 0.005 | 0.037 |
| rs9636445  | 2 | 74.787 | 0.93 | 0.82 | 1.01 | 0.163 | 0.34 | 0.16 | 0.55 | 0.005 | 0.037 |
| rs9636446  | 2 | 74.787 | 0.93 | 0.82 | 1.01 | 0.163 | 0.34 | 0.16 | 0.55 | 0.005 | 0.037 |
| rs12615011 | 2 | 74.788 | 0.93 | 0.82 | 1.01 | 0.164 | 0.35 | 0.16 | 0.55 | 0.005 | 0.037 |
| rs12621560 | 2 | 74.788 | 0.93 | 0.82 | 1.01 | 0.164 | 0.35 | 0.16 | 0.55 | 0.005 | 0.037 |
| rs205645   | 2 | 74.792 | 0.96 | 0.92 | 0.99 | 0.053 | 0.49 | 0.23 | 0.74 | 0.024 | 0.035 |
| rs1137     | 2 | 74.793 | 0.96 | 0.92 | 0.99 | 0.054 | 0.49 | 0.23 | 0.73 | 0.023 | 0.035 |
| rs150138   | 2 | 74.793 | 0.96 | 0.92 | 0.99 | 0.054 | 0.49 | 0.23 | 0.73 | 0.023 | 0.035 |
| rs205643   | 2 | 74.796 | 0.96 | 0.92 | 0.99 | 0.055 | 0.49 | 0.22 | 0.73 | 0.024 | 0.034 |

|            |   |        |      |      |      |       |      |      |      |       |       |
|------------|---|--------|------|------|------|-------|------|------|------|-------|-------|
| rs205638   | 2 | 74.804 | 0.96 | 0.92 | 0.99 | 0.057 | 0.49 | 0.22 | 0.74 | 0.025 | 0.033 |
| rs205636   | 2 | 74.805 | 0.96 | 0.92 | 0.99 | 0.056 | 0.49 | 0.21 | 0.74 | 0.028 | 0.033 |
| rs205637   | 2 | 74.805 | 0.96 | 0.92 | 0.99 | 0.056 | 0.49 | 0.21 | 0.74 | 0.028 | 0.034 |
| rs12621015 | 2 | 74.807 | 0.9  | 0.74 | 1    | 0.172 | 0.34 | 0.05 | 0.64 | 0.193 | 0.05  |
| rs205634   | 2 | 74.809 | 0.97 | 0.93 | 0.99 | 0.064 | 0.48 | 0.21 | 0.74 | 0.031 | 0.028 |
| rs205631   | 2 | 74.812 | 0.95 | 0.88 | 1    | 0.122 | 0.43 | 0.18 | 0.69 | 0.015 | 0.035 |
| rs6710960  | 2 | 74.814 | 0.89 | 0.75 | 0.99 | 0.103 | 0.37 | 0.03 | 0.78 | 0.269 | 0.06  |
| rs10185931 | 2 | 74.815 | 0.9  | 0.74 | 1.01 | 0.196 | 0.41 | 0.03 | 0.82 | 0.544 | 0.068 |

Table S6. Single-locus analyses for eQTL SNPs of *LYCAT*. (Ch: chromosome; ME: mediation effect; AE: alternative effect; CI: confidence interval).

| SNP        | Ch | Location (Mb) | ME   | 95% CI |      | P-value | AE   | 95% CI |      | P-value | Proportion Of Mediation |
|------------|----|---------------|------|--------|------|---------|------|--------|------|---------|-------------------------|
| rs829613   | 2  | 30.484        | 0.84 | 0.71   | 0.91 | 0.004   | 1.13 | 0.7    | 2.17 | 0.671   | 3.42                    |
| rs829614   | 2  | 30.484        | 0.84 | 0.71   | 0.91 | 0.004   | 1.13 | 0.7    | 2.17 | 0.671   | 3.42                    |
| rs829610   | 2  | 30.485        | 0.84 | 0.71   | 0.91 | 0.004   | 1.13 | 0.71   | 2.15 | 0.672   | 3.38                    |
| rs829611   | 2  | 30.485        | 0.84 | 0.71   | 0.91 | 0.004   | 1.13 | 0.71   | 2.15 | 0.671   | 3.4                     |
| rs829612   | 2  | 30.485        | 0.84 | 0.71   | 0.91 | 0.004   | 1.13 | 0.7    | 2.16 | 0.671   | 3.4                     |
| rs829603   | 2  | 30.489        | 0.94 | 0.88   | 0.96 | 0.007   | 0.75 | 0.49   | 1.21 | 0.197   | 0.156                   |
| rs2076932  | 2  | 30.49         | 0.86 | 0.77   | 0.92 | 0.001   | 0.77 | 0.47   | 1.18 | 0.258   | 0.316                   |
| rs829601   | 2  | 30.49         | 0.93 | 0.87   | 0.96 | 0.008   | 0.77 | 0.52   | 1.24 | 0.236   | 0.187                   |
| rs12990925 | 2  | 30.491        | 0.82 | 0.71   | 0.89 | 0.001   | 0.74 | 0.4    | 1.25 | 0.286   | 0.346                   |
| rs711240   | 2  | 30.491        | 0.94 | 0.87   | 0.96 | 0.007   | 0.78 | 0.53   | 1.23 | 0.242   | 0.189                   |
| rs829596   | 2  | 30.493        | 0.94 | 0.88   | 0.97 | 0.007   | 0.76 | 0.51   | 1.18 | 0.188   | 0.163                   |
| rs711237   | 2  | 30.503        | 0.94 | 0.88   | 0.97 | 0.007   | 0.77 | 0.52   | 1.19 | 0.201   | 0.164                   |
| rs864910   | 2  | 30.504        | 0.94 | 0.88   | 0.97 | 0.008   | 0.77 | 0.52   | 1.21 | 0.22    | 0.171                   |
| rs829697   | 2  | 30.506        | 1.11 | 0.95   | 1.5  | 0.381   | 0.82 | 0.29   | 1.54 | 0.657   | -0.981                  |
| rs12714306 | 2  | 30.508        | 0.94 | 0.87   | 0.97 | 0.011   | 0.79 | 0.52   | 1.29 | 0.279   | 0.191                   |
| rs6727836  | 2  | 30.508        | 0.95 | 0.9    | 0.97 | 0.005   | 0.81 | 0.54   | 1.24 | 0.308   | 0.185                   |
| rs829692   | 2  | 30.51         | 1.1  | 0.95   | 1.5  | 0.383   | 0.83 | 0.29   | 1.55 | 0.658   | -0.973                  |
| rs829693   | 2  | 30.511        | 0.77 | 0.6    | 0.87 | 0.008   | 0.73 | 0.47   | 1.18 | 0.19    | 0.386                   |
| rs829689   | 2  | 30.515        | 0.77 | 0.6    | 0.88 | 0.01    | 0.73 | 0.47   | 1.2  | 0.193   | 0.388                   |
| rs1723175  | 2  | 30.521        | 0.77 | 0.59   | 0.89 | 0.016   | 0.72 | 0.47   | 1.16 | 0.164   | 0.375                   |
| rs13017224 | 2  | 30.522        | 0.86 | 0.74   | 0.94 | 0.011   | 0.94 | 0.51   | 1.34 | 0.814   | 0.682                   |
| rs13413678 | 2  | 30.522        | 0.7  | 0.42   | 0.87 | 0.063   | 0.77 | 0.47   | 2.03 | 0.514   | 0.504                   |
| rs1662955  | 2  | 30.524        | 0.77 | 0.6    | 0.9  | 0.018   | 0.73 | 0.48   | 1.17 | 0.168   | 0.378                   |
| rs1723156  | 2  | 30.529        | 0.77 | 0.6    | 0.9  | 0.018   | 0.73 | 0.48   | 1.17 | 0.168   | 0.378                   |
| rs1612616  | 2  | 30.53         | 0.77 | 0.6    | 0.9  | 0.018   | 0.73 | 0.48   | 1.17 | 0.168   | 0.378                   |
| rs1614348  | 2  | 30.53         | 0.77 | 0.6    | 0.9  | 0.018   | 0.73 | 0.48   | 1.17 | 0.168   | 0.378                   |
| rs829584   | 2  | 30.531        | 0.77 | 0.6    | 0.9  | 0.018   | 0.73 | 0.48   | 1.17 | 0.169   | 0.378                   |
| rs829576   | 2  | 30.534        | 0.77 | 0.6    | 0.9  | 0.018   | 0.73 | 0.48   | 1.17 | 0.169   | 0.378                   |
| rs17394450 | 2  | 30.535        | 0.94 | 0.9    | 0.96 | 0       | 0.72 | 0.3    | 1.16 | 0.351   | 0.141                   |
| rs829573   | 2  | 30.536        | 0.77 | 0.6    | 0.9  | 0.018   | 0.73 | 0.48   | 1.17 | 0.17    | 0.378                   |
| rs829571   | 2  | 30.537        | 0.77 | 0.6    | 0.9  | 0.018   | 0.73 | 0.48   | 1.17 | 0.17    | 0.378                   |
| rs10198587 | 2  | 30.539        | 0.7  | 0.43   | 0.87 | 0.067   | 0.78 | 0.47   | 2.05 | 0.526   | 0.506                   |
| rs12469849 | 2  | 30.539        | 0.7  | 0.43   | 0.87 | 0.067   | 0.78 | 0.47   | 2.05 | 0.526   | 0.507                   |
| rs10199517 | 2  | 30.54         | 0.92 | 0.87   | 0.95 | 0       | 0.69 | 0.34   | 1.12 | 0.194   | 0.149                   |
| rs829568   | 2  | 30.541        | 1.09 | 0.94   | 1.44 | 0.412   | 0.83 | 0.29   | 1.56 | 0.659   | -0.748                  |
| rs10169001 | 2  | 30.542        | 0.7  | 0.43   | 0.87 | 0.067   | 0.78 | 0.47   | 2.05 | 0.528   | 0.506                   |
| rs10208299 | 2  | 30.542        | 0.7  | 0.43   | 0.87 | 0.067   | 0.78 | 0.47   | 2.05 | 0.529   | 0.506                   |
| rs10208587 | 2  | 30.542        | 0.7  | 0.43   | 0.87 | 0.067   | 0.78 | 0.47   | 2.06 | 0.529   | 0.506                   |



|            |   |        |      |      |      |       |      |      |      |       |       |
|------------|---|--------|------|------|------|-------|------|------|------|-------|-------|
| rs11901989 | 2 | 30.542 | 0.7  | 0.43 | 0.87 | 0.067 | 0.78 | 0.47 | 2.05 | 0.527 | 0.506 |
| rs13430515 | 2 | 30.543 | 0.71 | 0.43 | 0.87 | 0.068 | 0.78 | 0.47 | 2.06 | 0.53  | 0.506 |
| rs13430622 | 2 | 30.543 | 0.71 | 0.43 | 0.87 | 0.068 | 0.78 | 0.47 | 2.06 | 0.531 | 0.506 |
| rs1997036  | 2 | 30.543 | 0.7  | 0.43 | 0.87 | 0.068 | 0.78 | 0.47 | 2.06 | 0.529 | 0.506 |
| rs1997037  | 2 | 30.543 | 0.7  | 0.43 | 0.87 | 0.068 | 0.78 | 0.47 | 2.06 | 0.53  | 0.506 |
| rs13424441 | 2 | 30.545 | 0.71 | 0.43 | 0.87 | 0.068 | 0.78 | 0.47 | 2.06 | 0.531 | 0.506 |
| rs829566   | 2 | 30.546 | 1.11 | 0.96 | 1.48 | 0.351 | 0.89 | 0.35 | 1.73 | 0.769 | -5.22 |
| rs1357850  | 2 | 30.549 | 0.87 | 0.79 | 0.92 | 0.001 | 0.72 | 0.45 | 1.14 | 0.159 | 0.249 |
| rs829562   | 2 | 30.549 | 0.77 | 0.6  | 0.9  | 0.018 | 0.73 | 0.48 | 1.18 | 0.175 | 0.379 |
| rs1357849  | 2 | 30.55  | 0.91 | 0.85 | 0.94 | 0     | 0.67 | 0.33 | 1.09 | 0.17  | 0.163 |
| rs2692041  | 2 | 30.55  | 0.77 | 0.6  | 0.9  | 0.017 | 0.73 | 0.47 | 1.18 | 0.171 | 0.377 |
| rs829645   | 2 | 30.55  | 0.77 | 0.6  | 0.9  | 0.018 | 0.73 | 0.48 | 1.18 | 0.176 | 0.379 |
| rs13393150 | 2 | 30.552 | 0.71 | 0.44 | 0.88 | 0.069 | 0.78 | 0.47 | 2.06 | 0.536 | 0.505 |
| rs4952129  | 2 | 30.552 | 0.71 | 0.44 | 0.88 | 0.069 | 0.78 | 0.47 | 2.06 | 0.535 | 0.505 |
| rs4952130  | 2 | 30.552 | 0.71 | 0.44 | 0.88 | 0.069 | 0.78 | 0.47 | 2.06 | 0.535 | 0.505 |
| rs829643   | 2 | 30.552 | 1.11 | 0.96 | 1.48 | 0.354 | 0.88 | 0.35 | 1.72 | 0.761 | -3.97 |
| rs829640   | 2 | 30.554 | 1.11 | 0.96 | 1.48 | 0.355 | 0.88 | 0.35 | 1.72 | 0.758 | -3.65 |
| rs711241   | 2 | 30.555 | 1.11 | 0.96 | 1.48 | 0.355 | 0.88 | 0.35 | 1.72 | 0.758 | -3.6  |
| rs2363294  | 2 | 30.561 | 0.71 | 0.44 | 0.88 | 0.069 | 0.78 | 0.47 | 2.06 | 0.538 | 0.504 |
| rs829683   | 2 | 30.562 | 1.1  | 0.96 | 1.47 | 0.356 | 0.88 | 0.35 | 1.72 | 0.755 | -3.32 |
| rs4952132  | 2 | 30.563 | 0.72 | 0.45 | 0.88 | 0.069 | 0.78 | 0.47 | 2.06 | 0.539 | 0.503 |
| rs829676   | 2 | 30.564 | 1.1  | 0.96 | 1.47 | 0.358 | 0.88 | 0.36 | 1.71 | 0.749 | -2.87 |
| rs829674   | 2 | 30.565 | 1.1  | 0.96 | 1.47 | 0.358 | 0.88 | 0.36 | 1.71 | 0.748 | -2.8  |
| rs10180482 | 2 | 30.568 | 0.88 | 0.8  | 0.93 | 0.001 | 0.73 | 0.46 | 1.13 | 0.164 | 0.243 |
| rs1723167  | 2 | 30.568 | 0.78 | 0.61 | 0.9  | 0.019 | 0.72 | 0.47 | 1.15 | 0.159 | 0.362 |
| rs11899182 | 2 | 30.57  | 0.72 | 0.46 | 0.88 | 0.068 | 0.79 | 0.48 | 2.05 | 0.543 | 0.504 |
| rs829652   | 2 | 30.57  | 1.1  | 0.96 | 1.47 | 0.359 | 0.87 | 0.36 | 1.7  | 0.738 | -2.38 |
| rs829650   | 2 | 30.572 | 0.78 | 0.61 | 0.9  | 0.018 | 0.74 | 0.48 | 1.18 | 0.191 | 0.386 |
| rs12476805 | 2 | 30.575 | 0.72 | 0.43 | 0.9  | 0.086 | 0.78 | 0.46 | 2.27 | 0.57  | 0.506 |
| rs1880540  | 2 | 30.575 | 0.93 | 0.88 | 0.95 | 0     | 0.7  | 0.36 | 1.09 | 0.194 | 0.145 |
| rs17009601 | 2 | 30.591 | 0.72 | 0.46 | 0.88 | 0.068 | 0.79 | 0.48 | 2.06 | 0.546 | 0.506 |
| rs829636   | 2 | 30.591 | 0.79 | 0.62 | 0.91 | 0.02  | 0.73 | 0.47 | 1.19 | 0.177 | 0.36  |
| rs12467831 | 2 | 30.592 | 0.72 | 0.46 | 0.88 | 0.068 | 0.79 | 0.48 | 2.06 | 0.546 | 0.506 |
| rs1252639  | 2 | 30.593 | 0.78 | 0.61 | 0.9  | 0.018 | 0.74 | 0.49 | 1.19 | 0.195 | 0.389 |
| rs1252643  | 2 | 30.593 | 0.78 | 0.61 | 0.9  | 0.018 | 0.74 | 0.49 | 1.19 | 0.195 | 0.389 |
| rs17038632 | 2 | 30.594 | 0.88 | 0.8  | 0.94 | 0.003 | 0.92 | 0.45 | 1.34 | 0.797 | 0.584 |
| rs10170012 | 2 | 30.597 | 0.72 | 0.46 | 0.88 | 0.068 | 0.79 | 0.48 | 2.07 | 0.546 | 0.506 |
| rs13034406 | 2 | 30.601 | 0.88 | 0.8  | 0.94 | 0.003 | 0.93 | 0.47 | 1.35 | 0.827 | 0.623 |
| rs17322869 | 2 | 30.601 | 0.88 | 0.8  | 0.94 | 0.003 | 0.92 | 0.45 | 1.34 | 0.797 | 0.583 |
| rs766880   | 2 | 30.602 | 0.72 | 0.46 | 0.88 | 0.068 | 0.79 | 0.48 | 2.07 | 0.546 | 0.506 |
| rs1982286  | 2 | 30.603 | 0.72 | 0.46 | 0.88 | 0.068 | 0.79 | 0.48 | 2.07 | 0.546 | 0.506 |
| rs2363311  | 2 | 30.603 | 0.72 | 0.46 | 0.88 | 0.068 | 0.79 | 0.48 | 2.07 | 0.546 | 0.506 |
| rs10176138 | 2 | 30.604 | 0.72 | 0.46 | 0.88 | 0.068 | 0.79 | 0.48 | 2.07 | 0.546 | 0.506 |

|            |   |        |      |      |      |       |      |      |      |       |       |
|------------|---|--------|------|------|------|-------|------|------|------|-------|-------|
| rs1252627  | 2 | 30.604 | 1.1  | 0.96 | 1.47 | 0.359 | 0.87 | 0.36 | 1.68 | 0.73  | -2.14 |
| rs2028668  | 2 | 30.605 | 0.72 | 0.46 | 0.88 | 0.068 | 0.79 | 0.48 | 2.07 | 0.546 | 0.506 |
| rs4952141  | 2 | 30.605 | 0.72 | 0.46 | 0.88 | 0.068 | 0.79 | 0.48 | 2.07 | 0.546 | 0.506 |
| rs829621   | 2 | 30.605 | 1.1  | 0.96 | 1.47 | 0.354 | 0.87 | 0.36 | 1.68 | 0.735 | -2.43 |
| rs10206668 | 2 | 30.606 | 0.72 | 0.46 | 0.88 | 0.068 | 0.79 | 0.48 | 2.07 | 0.546 | 0.506 |
| rs13432085 | 2 | 30.608 | 0.72 | 0.46 | 0.88 | 0.068 | 0.79 | 0.48 | 2.07 | 0.546 | 0.506 |
| rs829623   | 2 | 30.609 | 0.78 | 0.61 | 0.9  | 0.017 | 0.74 | 0.49 | 1.2  | 0.199 | 0.394 |
| rs829624   | 2 | 30.61  | 1.11 | 0.96 | 1.47 | 0.344 | 0.88 | 0.36 | 1.7  | 0.747 | -3.25 |
| rs829625   | 2 | 30.61  | 1.11 | 0.96 | 1.47 | 0.343 | 0.88 | 0.36 | 1.7  | 0.748 | -3.3  |
| rs829626   | 2 | 30.61  | 0.96 | 0.92 | 0.98 | 0.013 | 0.85 | 0.57 | 1.3  | 0.438 | 0.184 |
| rs829628   | 2 | 30.61  | 0.96 | 0.92 | 0.98 | 0.013 | 0.85 | 0.57 | 1.3  | 0.438 | 0.184 |
| rs2167970  | 2 | 30.611 | 0.72 | 0.46 | 0.88 | 0.068 | 0.79 | 0.48 | 2.07 | 0.546 | 0.506 |
| rs1404607  | 2 | 30.616 | 0.72 | 0.46 | 0.88 | 0.068 | 0.79 | 0.48 | 2.07 | 0.546 | 0.505 |
| rs13413980 | 2 | 30.62  | 0.72 | 0.46 | 0.88 | 0.068 | 0.79 | 0.48 | 2.07 | 0.546 | 0.505 |
| rs7562645  | 2 | 30.62  | 0.78 | 0.61 | 0.9  | 0.016 | 0.75 | 0.49 | 1.2  | 0.203 | 0.397 |
| rs10495776 | 2 | 30.621 | 0.95 | 0.89 | 0.98 | 0.028 | 0.83 | 0.56 | 1.35 | 0.403 | 0.203 |
| rs13417949 | 2 | 30.621 | 0.72 | 0.46 | 0.88 | 0.068 | 0.79 | 0.48 | 2.07 | 0.546 | 0.505 |
| rs11692096 | 2 | 30.623 | 1.11 | 0.96 | 1.48 | 0.328 | 0.89 | 0.36 | 1.7  | 0.766 | -6.48 |
| rs6712951  | 2 | 30.624 | 0.96 | 0.92 | 0.98 | 0.013 | 0.84 | 0.57 | 1.29 | 0.405 | 0.172 |
| rs10205934 | 2 | 30.626 | 0.96 | 0.92 | 0.98 | 0.013 | 0.85 | 0.57 | 1.3  | 0.44  | 0.184 |
| rs12477267 | 2 | 30.626 | 0.72 | 0.46 | 0.88 | 0.068 | 0.79 | 0.48 | 2.07 | 0.547 | 0.507 |
| rs13388156 | 2 | 30.627 | 0.72 | 0.46 | 0.88 | 0.067 | 0.79 | 0.48 | 2.08 | 0.55  | 0.508 |
| rs13414468 | 2 | 30.627 | 0.72 | 0.46 | 0.88 | 0.067 | 0.79 | 0.48 | 2.09 | 0.55  | 0.509 |
| rs4951993  | 2 | 30.628 | 0.72 | 0.45 | 0.88 | 0.066 | 0.79 | 0.48 | 2.1  | 0.552 | 0.51  |
| rs10197664 | 2 | 30.629 | 0.96 | 0.92 | 0.98 | 0.013 | 0.84 | 0.57 | 1.29 | 0.41  | 0.172 |
| rs4144806  | 2 | 30.629 | 0.72 | 0.45 | 0.88 | 0.066 | 0.79 | 0.48 | 2.11 | 0.553 | 0.511 |
| rs17395007 | 2 | 30.63  | 1.12 | 0.97 | 1.48 | 0.311 | 0.9  | 0.36 | 1.69 | 0.785 | -312  |
| rs11901266 | 2 | 30.635 | 1.12 | 0.97 | 1.48 | 0.302 | 0.9  | 0.36 | 1.68 | 0.797 | 12.5  |
| rs4951994  | 2 | 30.635 | 0.72 | 0.45 | 0.88 | 0.064 | 0.79 | 0.48 | 2.16 | 0.559 | 0.516 |
| rs4952149  | 2 | 30.635 | 0.72 | 0.45 | 0.88 | 0.064 | 0.79 | 0.48 | 2.16 | 0.558 | 0.515 |
| rs12621663 | 2 | 30.638 | 0.96 | 0.92 | 0.98 | 0.014 | 0.86 | 0.57 | 1.3  | 0.449 | 0.184 |
| rs9789517  | 2 | 30.639 | 0.96 | 0.92 | 0.98 | 0.014 | 0.86 | 0.57 | 1.3  | 0.45  | 0.184 |
| rs10201020 | 2 | 30.641 | 0.68 | 0.36 | 0.88 | 0.105 | 0.83 | 0.43 | 5.53 | 0.774 | 0.6   |
| rs10495777 | 2 | 30.641 | 0.89 | 0.81 | 0.94 | 0.003 | 0.93 | 0.46 | 1.35 | 0.816 | 0.598 |
| rs9309681  | 2 | 30.641 | 0.72 | 0.45 | 0.88 | 0.062 | 0.79 | 0.48 | 2.19 | 0.563 | 0.52  |
| rs1869431  | 2 | 30.642 | 0.92 | 0.87 | 0.95 | 0     | 0.64 | 0.33 | 1.03 | 0.129 | 0.129 |
| rs12474202 | 2 | 30.643 | 0.71 | 0.43 | 0.89 | 0.067 | 0.73 | 0.4  | 2.65 | 0.525 | 0.445 |
| rs17395091 | 2 | 30.643 | 1.12 | 0.97 | 1.48 | 0.29  | 0.91 | 0.36 | 1.68 | 0.811 | 5.77  |
| rs4952150  | 2 | 30.643 | 0.71 | 0.43 | 0.89 | 0.068 | 0.73 | 0.4  | 2.65 | 0.523 | 0.444 |
| rs7602714  | 2 | 30.643 | 0.96 | 0.92 | 0.98 | 0.014 | 0.86 | 0.57 | 1.31 | 0.456 | 0.185 |
| rs12475104 | 2 | 30.644 | 0.71 | 0.43 | 0.89 | 0.067 | 0.73 | 0.4  | 2.65 | 0.526 | 0.446 |
| rs11676852 | 2 | 30.646 | 0.96 | 0.92 | 0.98 | 0.014 | 0.85 | 0.57 | 1.29 | 0.426 | 0.174 |
| rs1464817  | 2 | 30.646 | 0.98 | 0.96 | 0.99 | 0.007 | 0.77 | 0.49 | 1.16 | 0.226 | 0.071 |

|            |   |        |      |      |      |       |      |      |      |       |       |
|------------|---|--------|------|------|------|-------|------|------|------|-------|-------|
| rs13392757 | 2 | 30.647 | 0.77 | 0.56 | 0.89 | 0.033 | 0.84 | 0.53 | 1.88 | 0.586 | 0.551 |
| rs11127276 | 2 | 30.648 | 0.96 | 0.92 | 0.98 | 0.014 | 0.86 | 0.58 | 1.31 | 0.461 | 0.186 |
| rs17009805 | 2 | 30.649 | 0.71 | 0.44 | 0.87 | 0.059 | 0.8  | 0.48 | 2.34 | 0.577 | 0.53  |
| rs2363073  | 2 | 30.65  | 0.96 | 0.92 | 0.98 | 0.014 | 0.86 | 0.58 | 1.31 | 0.463 | 0.186 |
| rs4952151  | 2 | 30.65  | 0.71 | 0.46 | 0.87 | 0.043 | 0.8  | 0.49 | 2.09 | 0.554 | 0.534 |
| rs17009808 | 2 | 30.651 | 0.71 | 0.44 | 0.87 | 0.058 | 0.8  | 0.48 | 2.38 | 0.581 | 0.532 |
| rs4952152  | 2 | 30.651 | 0.71 | 0.44 | 0.87 | 0.059 | 0.8  | 0.48 | 2.37 | 0.58  | 0.532 |
| rs11127277 | 2 | 30.652 | 0.71 | 0.44 | 0.87 | 0.058 | 0.8  | 0.48 | 2.39 | 0.582 | 0.533 |
| rs12993664 | 2 | 30.654 | 0.89 | 0.82 | 0.94 | 0.002 | 0.95 | 0.48 | 1.36 | 0.861 | 0.661 |
| rs7355326  | 2 | 30.655 | 0.71 | 0.44 | 0.87 | 0.057 | 0.8  | 0.48 | 2.48 | 0.591 | 0.54  |
| rs7355456  | 2 | 30.656 | 0.71 | 0.44 | 0.87 | 0.057 | 0.8  | 0.48 | 2.49 | 0.592 | 0.54  |
| rs2363851  | 2 | 30.659 | 0.71 | 0.44 | 0.87 | 0.057 | 0.8  | 0.48 | 2.49 | 0.592 | 0.541 |
| rs4952154  | 2 | 30.663 | 0.7  | 0.44 | 0.87 | 0.057 | 0.8  | 0.48 | 2.49 | 0.592 | 0.54  |
| rs2593432  | 2 | 30.667 | 0.95 | 0.88 | 0.98 | 0.031 | 0.84 | 0.57 | 1.37 | 0.426 | 0.207 |
| rs2253299  | 2 | 30.668 | 1.13 | 0.97 | 1.49 | 0.251 | 0.93 | 0.38 | 1.66 | 0.861 | 2.17  |
| rs10204301 | 2 | 30.672 | 0.7  | 0.43 | 0.87 | 0.057 | 0.8  | 0.48 | 2.47 | 0.589 | 0.54  |
| rs13412012 | 2 | 30.672 | 0.7  | 0.43 | 0.87 | 0.058 | 0.8  | 0.48 | 2.46 | 0.589 | 0.539 |
| rs2593473  | 2 | 30.672 | 1.13 | 0.97 | 1.49 | 0.246 | 0.94 | 0.38 | 1.66 | 0.867 | 2.03  |
| rs2593438  | 2 | 30.676 | 0.95 | 0.88 | 0.97 | 0.031 | 0.84 | 0.57 | 1.36 | 0.423 | 0.212 |
| rs13427862 | 2 | 30.678 | 0.7  | 0.43 | 0.87 | 0.058 | 0.8  | 0.48 | 2.44 | 0.586 | 0.538 |
| rs10514772 | 2 | 30.679 | 0.7  | 0.43 | 0.87 | 0.058 | 0.8  | 0.48 | 2.44 | 0.586 | 0.538 |
| rs1074066  | 2 | 30.68  | 0.7  | 0.43 | 0.87 | 0.058 | 0.8  | 0.48 | 2.43 | 0.585 | 0.538 |
| rs4952161  | 2 | 30.685 | 0.7  | 0.43 | 0.87 | 0.059 | 0.8  | 0.48 | 2.43 | 0.584 | 0.538 |
| rs4952162  | 2 | 30.685 | 0.7  | 0.43 | 0.87 | 0.059 | 0.8  | 0.48 | 2.42 | 0.583 | 0.537 |
| rs1869425  | 2 | 30.688 | 0.7  | 0.43 | 0.87 | 0.059 | 0.79 | 0.48 | 2.4  | 0.582 | 0.537 |
| rs2166669  | 2 | 30.688 | 0.7  | 0.43 | 0.87 | 0.059 | 0.79 | 0.48 | 2.4  | 0.582 | 0.537 |
| rs11895131 | 2 | 30.689 | 1.14 | 0.98 | 1.5  | 0.233 | 0.95 | 0.38 | 1.66 | 0.886 | 1.71  |
| rs7597579  | 2 | 30.689 | 0.7  | 0.43 | 0.87 | 0.06  | 0.79 | 0.48 | 2.37 | 0.58  | 0.536 |
| rs11127281 | 2 | 30.69  | 1.14 | 0.98 | 1.49 | 0.232 | 0.95 | 0.38 | 1.66 | 0.887 | 1.7   |
| rs4951998  | 2 | 30.69  | 0.7  | 0.43 | 0.87 | 0.06  | 0.79 | 0.48 | 2.35 | 0.578 | 0.536 |
| rs1869422  | 2 | 30.692 | 1.14 | 0.98 | 1.49 | 0.228 | 0.95 | 0.38 | 1.66 | 0.892 | 1.63  |
| rs4952000  | 2 | 30.692 | 0.7  | 0.43 | 0.87 | 0.06  | 0.79 | 0.48 | 2.34 | 0.577 | 0.535 |
| rs4952163  | 2 | 30.692 | 0.7  | 0.43 | 0.87 | 0.06  | 0.79 | 0.48 | 2.33 | 0.577 | 0.535 |
| rs6718730  | 2 | 30.692 | 0.89 | 0.8  | 0.94 | 0.003 | 1.04 | 0.62 | 1.52 | 0.871 | 1.52  |
| rs958580   | 2 | 30.693 | 0.89 | 0.81 | 0.94 | 0.003 | 0.96 | 0.54 | 1.38 | 0.869 | 0.711 |
| rs12469630 | 2 | 30.694 | 0.7  | 0.42 | 0.87 | 0.061 | 0.79 | 0.48 | 2.29 | 0.575 | 0.534 |
| rs12469745 | 2 | 30.694 | 0.7  | 0.42 | 0.87 | 0.061 | 0.79 | 0.48 | 2.27 | 0.573 | 0.534 |
| rs13419435 | 2 | 30.695 | 0.7  | 0.42 | 0.87 | 0.061 | 0.79 | 0.48 | 2.27 | 0.572 | 0.534 |
| rs13383939 | 2 | 30.696 | 0.7  | 0.42 | 0.87 | 0.061 | 0.79 | 0.48 | 2.28 | 0.572 | 0.534 |
| rs2084301  | 2 | 30.698 | 0.7  | 0.42 | 0.87 | 0.061 | 0.79 | 0.48 | 2.28 | 0.571 | 0.533 |
| rs2100112  | 2 | 30.698 | 0.7  | 0.42 | 0.87 | 0.061 | 0.79 | 0.48 | 2.28 | 0.57  | 0.533 |
| rs2100113  | 2 | 30.698 | 0.7  | 0.42 | 0.87 | 0.061 | 0.79 | 0.48 | 2.28 | 0.571 | 0.533 |
| rs2593445  | 2 | 30.702 | 1.14 | 0.98 | 1.5  | 0.216 | 0.96 | 0.39 | 1.64 | 0.908 | 1.46  |

|            |   |        |      |      |      |       |      |      |      |       |       |
|------------|---|--------|------|------|------|-------|------|------|------|-------|-------|
| rs2609920  | 2 | 30.703 | 1.14 | 0.98 | 1.5  | 0.214 | 0.96 | 0.39 | 1.64 | 0.911 | 1.44  |
| rs736256   | 2 | 30.708 | 0.94 | 0.86 | 0.97 | 0.029 | 0.83 | 0.56 | 1.36 | 0.402 | 0.234 |
| rs12052260 | 2 | 30.71  | 0.89 | 0.81 | 0.94 | 0.003 | 0.96 | 0.54 | 1.38 | 0.881 | 0.73  |
| rs10469986 | 2 | 30.711 | 0.69 | 0.42 | 0.87 | 0.062 | 0.79 | 0.48 | 2.16 | 0.558 | 0.531 |
| rs12052683 | 2 | 30.711 | 0.89 | 0.81 | 0.94 | 0.003 | 0.96 | 0.53 | 1.38 | 0.883 | 0.734 |
| rs11127282 | 2 | 30.712 | 0.89 | 0.81 | 0.94 | 0.003 | 0.95 | 0.5  | 1.39 | 0.864 | 0.685 |
| rs12613783 | 2 | 30.712 | 0.89 | 0.81 | 0.94 | 0.003 | 0.96 | 0.53 | 1.38 | 0.887 | 0.741 |
| rs10469987 | 2 | 30.713 | 0.69 | 0.42 | 0.87 | 0.062 | 0.79 | 0.48 | 2.14 | 0.558 | 0.532 |
| rs4952003  | 2 | 30.714 | 0.69 | 0.42 | 0.87 | 0.062 | 0.79 | 0.48 | 2.14 | 0.559 | 0.533 |
| rs13405340 | 2 | 30.715 | 0.69 | 0.42 | 0.87 | 0.062 | 0.79 | 0.48 | 2.12 | 0.56  | 0.535 |
| rs4952004  | 2 | 30.715 | 0.69 | 0.42 | 0.87 | 0.062 | 0.79 | 0.48 | 2.13 | 0.56  | 0.533 |
| rs12466818 | 2 | 30.716 | 0.69 | 0.42 | 0.87 | 0.062 | 0.79 | 0.48 | 2.12 | 0.561 | 0.535 |
| rs13408621 | 2 | 30.716 | 0.69 | 0.42 | 0.87 | 0.062 | 0.79 | 0.48 | 2.12 | 0.56  | 0.535 |
| rs10200589 | 2 | 30.717 | 0.69 | 0.42 | 0.87 | 0.063 | 0.79 | 0.48 | 2.13 | 0.564 | 0.537 |
| rs12467646 | 2 | 30.717 | 0.69 | 0.42 | 0.87 | 0.062 | 0.79 | 0.48 | 2.12 | 0.561 | 0.535 |
| rs12471868 | 2 | 30.717 | 0.69 | 0.42 | 0.87 | 0.062 | 0.79 | 0.48 | 2.12 | 0.561 | 0.535 |
| rs6723023  | 2 | 30.718 | 0.69 | 0.41 | 0.87 | 0.064 | 0.79 | 0.48 | 2.15 | 0.566 | 0.538 |
| rs3816593  | 2 | 30.719 | 0.69 | 0.41 | 0.86 | 0.065 | 0.79 | 0.47 | 2.2  | 0.572 | 0.541 |
| rs6548026  | 2 | 30.726 | 0.9  | 0.82 | 0.95 | 0.003 | 0.94 | 0.55 | 1.35 | 0.794 | 0.617 |
| rs7583600  | 2 | 30.726 | 0.9  | 0.82 | 0.95 | 0.003 | 0.94 | 0.55 | 1.35 | 0.796 | 0.62  |
| rs8179733  | 2 | 30.727 | 0.91 | 0.84 | 0.95 | 0.002 | 0.94 | 0.5  | 1.32 | 0.796 | 0.578 |
| rs2602777  | 2 | 30.733 | 0.91 | 0.85 | 0.96 | 0.003 | 0.94 | 0.52 | 1.32 | 0.784 | 0.559 |
| rs2602775  | 2 | 30.737 | 0.71 | 0.45 | 0.9  | 0.043 | 1.24 | 0.74 | 3.71 | 0.602 | 3     |
| rs1864281  | 2 | 31.395 | 0.89 | 0.76 | 0.98 | 0.059 | 0.89 | 0.51 | 1.28 | 0.632 | 0.487 |
| rs10153659 | 2 | 31.397 | 0.87 | 0.68 | 1.01 | 0.173 | 0.88 | 0.27 | 1.3  | 0.783 | 0.483 |
| rs13397598 | 2 | 31.397 | 0.87 | 0.67 | 1    | 0.173 | 0.88 | 0.25 | 1.32 | 0.791 | 0.488 |

Table S7. Single-locus analyses for eQTL SNPs of *ST8SIA4*. (Ch: chromosome; ME: mediation effect; AE: alternative effect; CI: confidence interval).

| SNP        | Ch | Location (Mb) | ME   | 95% CI |      | P-value | AE   | 95% CI |      | P-value | Proportion Of Mediation |
|------------|----|---------------|------|--------|------|---------|------|--------|------|---------|-------------------------|
| rs10059478 | 5  | 100.01        | 1.02 | 1.01   | 1.04 | 0.004   | 1.52 | 1.01   | 2.26 | 0.033   | 0.063                   |
| rs7736625  | 5  | 100.011       | 1.05 | 1.02   | 1.08 | 0.002   | 1.49 | 1.04   | 2.16 | 0.032   | 0.123                   |
| rs6861241  | 5  | 100.014       | 1.02 | 1.01   | 1.04 | 0.005   | 1.54 | 1.03   | 2.27 | 0.027   | 0.062                   |
| rs6866306  | 5  | 100.014       | 1.05 | 1.03   | 1.09 | 0.002   | 1.24 | 0.89   | 1.8  | 0.247   | 0.21                    |
| rs6880868  | 5  | 100.014       | 1.05 | 1.02   | 1.08 | 0.002   | 1.5  | 1.06   | 2.18 | 0.026   | 0.121                   |
| rs7718146  | 5  | 100.017       | 1.05 | 1.03   | 1.08 | 0.002   | 1.52 | 1.05   | 2.19 | 0.026   | 0.122                   |
| rs6879808  | 5  | 100.018       | 1.05 | 1.03   | 1.08 | 0.002   | 1.52 | 1.05   | 2.19 | 0.026   | 0.122                   |
| rs6888825  | 5  | 100.018       | 1.05 | 1.03   | 1.08 | 0.002   | 1.52 | 1.05   | 2.18 | 0.026   | 0.122                   |
| rs13188041 | 5  | 100.02        | 1.06 | 1.03   | 1.11 | 0.002   | 1.26 | 0.87   | 1.83 | 0.219   | 0.231                   |
| rs905829   | 5  | 100.02        | 1.03 | 1.01   | 1.06 | 0.006   | 1.59 | 1.06   | 2.41 | 0.026   | 0.077                   |
| rs10900756 | 5  | 100.022       | 1.06 | 1.03   | 1.11 | 0.002   | 1.25 | 0.86   | 1.82 | 0.222   | 0.232                   |
| rs7738040  | 5  | 100.026       | 1.06 | 1.03   | 1.11 | 0.002   | 1.25 | 0.86   | 1.82 | 0.226   | 0.232                   |
| rs10053332 | 5  | 100.027       | 1.03 | 1.01   | 1.06 | 0.006   | 1.57 | 1.05   | 2.38 | 0.032   | 0.077                   |
| rs1445173  | 5  | 100.028       | 1.06 | 1.03   | 1.11 | 0.002   | 1.25 | 0.86   | 1.82 | 0.227   | 0.233                   |
| rs6595366  | 5  | 100.03        | 1.05 | 1.03   | 1.09 | 0.002   | 1.36 | 0.97   | 1.94 | 0.085   | 0.166                   |
| rs6896126  | 5  | 100.03        | 1.03 | 1.01   | 1.06 | 0.006   | 1.57 | 1.04   | 2.38 | 0.033   | 0.078                   |
| rs12514914 | 5  | 100.033       | 1.06 | 1.03   | 1.11 | 0.002   | 1.25 | 0.86   | 1.81 | 0.235   | 0.235                   |
| rs12519913 | 5  | 100.033       | 1.06 | 1.03   | 1.11 | 0.002   | 1.25 | 0.86   | 1.81 | 0.234   | 0.235                   |
| rs6595367  | 5  | 100.034       | 1.05 | 1.03   | 1.1  | 0.001   | 1.52 | 1.04   | 2.16 | 0.025   | 0.137                   |
| rs4703110  | 5  | 100.037       | 1.11 | 0.99   | 1.31 | 0.131   | 1.8  | 0.74   | 3.04 | 0.106   | 0.202                   |
| rs7702043  | 5  | 100.044       | 1.05 | 1.03   | 1.1  | 0.001   | 1.51 | 1.03   | 2.15 | 0.03    | 0.139                   |
| rs6595380  | 5  | 100.047       | 1.05 | 1.03   | 1.09 | 0.002   | 1.33 | 0.95   | 1.89 | 0.109   | 0.172                   |
| rs2590411  | 5  | 100.048       | 1.05 | 1.03   | 1.09 | 0.002   | 1.33 | 0.94   | 1.89 | 0.111   | 0.173                   |
| rs2590413  | 5  | 100.05        | 1.05 | 1.03   | 1.09 | 0.002   | 1.33 | 0.94   | 1.89 | 0.112   | 0.173                   |
| rs10515269 | 5  | 100.054       | 1.06 | 1.03   | 1.11 | 0.001   | 1.19 | 0.82   | 1.71 | 0.356   | 0.276                   |
| rs2725112  | 5  | 100.054       | 1.03 | 1.01   | 1.06 | 0.006   | 1.55 | 1.03   | 2.33 | 0.035   | 0.078                   |
| rs2590421  | 5  | 100.055       | 1.05 | 1.03   | 1.09 | 0.002   | 1.34 | 0.95   | 1.9  | 0.105   | 0.17                    |
| rs2590422  | 5  | 100.056       | 1.05 | 1.03   | 1.09 | 0.002   | 1.33 | 0.95   | 1.89 | 0.111   | 0.173                   |
| rs2590424  | 5  | 100.057       | 1.05 | 1.03   | 1.09 | 0.002   | 1.33 | 0.94   | 1.88 | 0.113   | 0.173                   |
| rs2725110  | 5  | 100.058       | 1.05 | 1.03   | 1.09 | 0.002   | 1.32 | 0.94   | 1.87 | 0.121   | 0.177                   |
| rs12517897 | 5  | 100.059       | 1.06 | 1.03   | 1.11 | 0.001   | 1.18 | 0.82   | 1.72 | 0.363   | 0.28                    |
| rs2725106  | 5  | 100.06        | 1.05 | 1.03   | 1.09 | 0.002   | 1.3  | 0.92   | 1.86 | 0.144   | 0.173                   |
| rs2725107  | 5  | 100.06        | 1.05 | 1.03   | 1.09 | 0.002   | 1.31 | 0.93   | 1.86 | 0.125   | 0.179                   |
| rs2725105  | 5  | 100.061       | 1.05 | 1.03   | 1.09 | 0.002   | 1.3  | 0.92   | 1.86 | 0.144   | 0.173                   |
| rs6867428  | 5  | 100.061       | 1.06 | 1.03   | 1.1  | 0.001   | 1.17 | 0.81   | 1.69 | 0.406   | 0.282                   |
| rs7732166  | 5  | 100.071       | 1.06 | 1.03   | 1.1  | 0.001   | 1.17 | 0.81   | 1.69 | 0.407   | 0.282                   |
| rs6890822  | 5  | 100.076       | 1.06 | 1.03   | 1.1  | 0.001   | 1.17 | 0.81   | 1.69 | 0.407   | 0.282                   |
| rs11241664 | 5  | 100.081       | 1.12 | 1.06   | 1.22 | 0.001   | 1.53 | 1      | 2.2  | 0.035   | 0.264                   |

|            |   |         |      |      |      |       |      |      |      |       |       |
|------------|---|---------|------|------|------|-------|------|------|------|-------|-------|
| rs13173503 | 5 | 100.086 | 1.12 | 1.06 | 1.21 | 0.002 | 1.35 | 0.93 | 1.87 | 0.104 | 0.313 |
| rs2590433  | 5 | 100.086 | 1.07 | 1.01 | 1.16 | 0.039 | 1.77 | 1.05 | 2.71 | 0.019 | 0.146 |
| rs12515114 | 5 | 100.088 | 1.13 | 1.06 | 1.23 | 0.001 | 1.55 | 1.02 | 2.22 | 0.029 | 0.265 |
| rs13163793 | 5 | 100.088 | 1.13 | 1.06 | 1.23 | 0.001 | 1.55 | 1.02 | 2.22 | 0.029 | 0.265 |
| rs6875815  | 5 | 100.089 | 1.07 | 1.01 | 1.16 | 0.04  | 1.77 | 1.05 | 2.72 | 0.019 | 0.143 |
| rs2590432  | 5 | 100.09  | 1.07 | 1.01 | 1.16 | 0.041 | 1.77 | 1.05 | 2.72 | 0.018 | 0.142 |
| rs13158383 | 5 | 100.091 | 1.07 | 1.01 | 1.15 | 0.042 | 1.78 | 1.06 | 2.72 | 0.018 | 0.139 |
| rs13162330 | 5 | 100.091 | 1.13 | 1.06 | 1.23 | 0.001 | 1.55 | 1.02 | 2.23 | 0.028 | 0.265 |
| rs9986302  | 5 | 100.091 | 1.07 | 1.01 | 1.15 | 0.042 | 1.78 | 1.06 | 2.72 | 0.018 | 0.139 |
| rs11241671 | 5 | 100.094 | 1.12 | 1.06 | 1.22 | 0.002 | 1.36 | 0.93 | 1.88 | 0.096 | 0.313 |
| rs10751461 | 5 | 100.096 | 1.13 | 1.06 | 1.23 | 0.001 | 1.55 | 1.01 | 2.23 | 0.029 | 0.267 |
| rs2120913  | 5 | 100.096 | 1.12 | 1.06 | 1.22 | 0.002 | 1.36 | 0.93 | 1.88 | 0.097 | 0.315 |
| rs279090   | 5 | 100.099 | 1.07 | 1.01 | 1.15 | 0.042 | 1.76 | 1.03 | 2.71 | 0.02  | 0.14  |
| rs279091   | 5 | 100.099 | 1.07 | 1.01 | 1.15 | 0.042 | 1.76 | 1.03 | 2.71 | 0.02  | 0.141 |
| rs157178   | 5 | 100.1   | 1.13 | 1.07 | 1.23 | 0.001 | 1.54 | 1.01 | 2.23 | 0.03  | 0.268 |
| rs279095   | 5 | 100.101 | 1.11 | 1.05 | 1.2  | 0.002 | 1.33 | 0.91 | 1.9  | 0.133 | 0.311 |
| rs279112   | 5 | 100.106 | 1.07 | 1.01 | 1.15 | 0.043 | 1.74 | 1.02 | 2.69 | 0.023 | 0.142 |
| rs279108   | 5 | 100.11  | 1.12 | 1.06 | 1.21 | 0.002 | 1.37 | 0.95 | 1.91 | 0.084 | 0.301 |
| rs279109   | 5 | 100.11  | 1.07 | 1.01 | 1.15 | 0.043 | 1.74 | 1.01 | 2.68 | 0.024 | 0.143 |
| rs157180   | 5 | 100.111 | 1.13 | 1.06 | 1.22 | 0.001 | 1.52 | 1    | 2.16 | 0.034 | 0.268 |
| rs279106   | 5 | 100.111 | 1.13 | 1.06 | 1.22 | 0.001 | 1.5  | 0.99 | 2.13 | 0.039 | 0.274 |
| rs279107   | 5 | 100.111 | 1.12 | 1.06 | 1.21 | 0.001 | 1.27 | 0.81 | 1.81 | 0.246 | 0.357 |
| rs279105   | 5 | 100.113 | 1.07 | 1.02 | 1.15 | 0.035 | 1.68 | 1.03 | 2.56 | 0.02  | 0.144 |
| rs277861   | 5 | 100.116 | 1.07 | 1.02 | 1.15 | 0.029 | 1.47 | 0.95 | 2.2  | 0.064 | 0.178 |
| rs2725127  | 5 | 100.118 | 1.08 | 1.02 | 1.16 | 0.024 | 1.64 | 1.02 | 2.45 | 0.018 | 0.161 |
| rs157041   | 5 | 100.119 | 1.07 | 1.02 | 1.14 | 0.024 | 1.48 | 0.97 | 2.18 | 0.048 | 0.175 |
| rs277863   | 5 | 100.119 | 1.07 | 1.02 | 1.15 | 0.031 | 1.58 | 0.99 | 2.33 | 0.034 | 0.158 |
| rs277864   | 5 | 100.12  | 1.07 | 1.02 | 1.14 | 0.023 | 1.47 | 0.97 | 2.16 | 0.049 | 0.177 |
| rs277868   | 5 | 100.122 | 1.07 | 1.02 | 1.15 | 0.029 | 1.56 | 0.98 | 2.3  | 0.037 | 0.163 |
| rs278493   | 5 | 100.123 | 1.07 | 1.02 | 1.15 | 0.026 | 1.53 | 0.97 | 2.27 | 0.042 | 0.169 |
| rs278494   | 5 | 100.125 | 1.06 | 1.02 | 1.14 | 0.028 | 1.42 | 0.92 | 2.08 | 0.083 | 0.18  |
| rs278495   | 5 | 100.127 | 1.07 | 1.02 | 1.14 | 0.017 | 1.44 | 0.98 | 2.09 | 0.052 | 0.189 |
| rs278496   | 5 | 100.128 | 1.07 | 1.02 | 1.14 | 0.017 | 1.44 | 0.98 | 2.09 | 0.052 | 0.189 |
| rs278497   | 5 | 100.128 | 1.07 | 1.02 | 1.14 | 0.017 | 1.44 | 0.98 | 2.09 | 0.051 | 0.188 |
| rs2548262  | 5 | 100.129 | 1.07 | 1.02 | 1.14 | 0.017 | 1.44 | 0.98 | 2.09 | 0.051 | 0.188 |
| rs278500   | 5 | 100.13  | 1.07 | 1.02 | 1.15 | 0.024 | 1.51 | 0.97 | 2.24 | 0.046 | 0.173 |
| rs157181   | 5 | 100.131 | 1.07 | 1.02 | 1.15 | 0.024 | 1.51 | 0.97 | 2.24 | 0.046 | 0.173 |
| rs278502   | 5 | 100.131 | 1.07 | 1.02 | 1.14 | 0.017 | 1.44 | 0.98 | 2.09 | 0.051 | 0.188 |
| rs32441    | 5 | 100.133 | 1.12 | 1.06 | 1.22 | 0.001 | 1.31 | 0.89 | 1.81 | 0.14  | 0.334 |
| rs157043   | 5 | 100.135 | 1.08 | 1.03 | 1.16 | 0.017 | 1.54 | 1.01 | 2.23 | 0.027 | 0.179 |
| rs157042   | 5 | 100.136 | 1.07 | 1.02 | 1.15 | 0.025 | 1.51 | 0.96 | 2.24 | 0.047 | 0.173 |
| rs276459   | 5 | 100.136 | 1.07 | 1.02 | 1.15 | 0.025 | 1.51 | 0.96 | 2.23 | 0.048 | 0.173 |
| rs276458   | 5 | 100.137 | 1.07 | 1.02 | 1.15 | 0.025 | 1.51 | 0.96 | 2.23 | 0.048 | 0.173 |

|            |   |         |      |      |      |       |      |      |      |       |       |
|------------|---|---------|------|------|------|-------|------|------|------|-------|-------|
| rs149895   | 5 | 100.138 | 1.07 | 1.02 | 1.14 | 0.017 | 1.44 | 0.98 | 2.09 | 0.051 | 0.188 |
| rs277871   | 5 | 100.14  | 1.08 | 1.03 | 1.16 | 0.017 | 1.54 | 1.01 | 2.22 | 0.028 | 0.18  |
| rs277872   | 5 | 100.14  | 1.08 | 1.03 | 1.16 | 0.017 | 1.54 | 1.01 | 2.22 | 0.028 | 0.18  |
| rs6883673  | 5 | 100.145 | 1.05 | 1.01 | 1.11 | 0.03  | 1.59 | 1.06 | 2.32 | 0.018 | 0.123 |
| rs6864315  | 5 | 100.152 | 1.05 | 1.01 | 1.1  | 0.028 | 1.5  | 1.02 | 2.15 | 0.03  | 0.125 |
| rs7710701  | 5 | 100.153 | 1.05 | 1.01 | 1.11 | 0.03  | 1.59 | 1.06 | 2.32 | 0.018 | 0.124 |
| rs10060686 | 5 | 100.154 | 1.05 | 1.01 | 1.1  | 0.028 | 1.5  | 1.02 | 2.15 | 0.03  | 0.125 |
| rs2548261  | 5 | 100.155 | 1.05 | 1.01 | 1.1  | 0.028 | 1.5  | 1.02 | 2.15 | 0.03  | 0.125 |
| rs4703115  | 5 | 100.156 | 1.05 | 1.01 | 1.1  | 0.042 | 1.55 | 1.01 | 2.36 | 0.035 | 0.116 |
| rs10059953 | 5 | 100.157 | 1.05 | 1.01 | 1.1  | 0.028 | 1.5  | 1.02 | 2.15 | 0.03  | 0.125 |
| rs4703116  | 5 | 100.157 | 1.05 | 1.01 | 1.1  | 0.028 | 1.5  | 1.02 | 2.15 | 0.03  | 0.125 |
| rs13354552 | 5 | 100.158 | 1.05 | 1.01 | 1.1  | 0.042 | 1.55 | 1.01 | 2.36 | 0.036 | 0.116 |
| rs17778837 | 5 | 100.159 | 1.05 | 1.01 | 1.1  | 0.042 | 1.55 | 1.01 | 2.35 | 0.036 | 0.116 |
| rs13358607 | 5 | 100.16  | 1.05 | 1.01 | 1.1  | 0.042 | 1.55 | 1.01 | 2.35 | 0.037 | 0.117 |
| rs11745097 | 5 | 100.161 | 1.05 | 1.01 | 1.1  | 0.042 | 1.55 | 1.01 | 2.35 | 0.037 | 0.117 |
| rs3846626  | 5 | 100.161 | 1.05 | 1.01 | 1.1  | 0.028 | 1.5  | 1.02 | 2.15 | 0.03  | 0.125 |
| rs4703117  | 5 | 100.162 | 1.05 | 1.01 | 1.1  | 0.043 | 1.55 | 1.01 | 2.35 | 0.037 | 0.117 |
| rs4703118  | 5 | 100.164 | 1.05 | 1.01 | 1.1  | 0.043 | 1.54 | 1.01 | 2.34 | 0.038 | 0.117 |
| rs6886392  | 5 | 100.164 | 1.05 | 1.01 | 1.1  | 0.043 | 1.54 | 1.01 | 2.35 | 0.038 | 0.117 |
| rs17722835 | 5 | 100.167 | 1.08 | 0.98 | 1.27 | 0.233 | 1.36 | 0.59 | 2.58 | 0.405 | 0.242 |
| rs2548274  | 5 | 100.167 | 1.05 | 1.01 | 1.1  | 0.028 | 1.49 | 1.02 | 2.15 | 0.032 | 0.126 |
| rs2544920  | 5 | 100.169 | 1.05 | 1.02 | 1.1  | 0.009 | 1.48 | 1.03 | 2.09 | 0.027 | 0.133 |
| rs13857    | 5 | 100.171 | 1.05 | 1.02 | 1.1  | 0.013 | 1.5  | 1.01 | 2.18 | 0.033 | 0.126 |
| rs11584    | 5 | 100.173 | 1.05 | 1.02 | 1.1  | 0.009 | 1.47 | 1.03 | 2.08 | 0.028 | 0.134 |
| rs3776155  | 5 | 100.176 | 1.05 | 1.02 | 1.1  | 0.012 | 1.49 | 1    | 2.16 | 0.035 | 0.128 |
| rs10057237 | 5 | 100.177 | 1.05 | 1.02 | 1.1  | 0.012 | 1.49 | 1    | 2.16 | 0.035 | 0.128 |
| rs3909452  | 5 | 100.178 | 1.05 | 1.02 | 1.11 | 0.009 | 1.53 | 1.04 | 2.15 | 0.02  | 0.137 |
| rs12332642 | 5 | 100.183 | 1.06 | 1.03 | 1.12 | 0.004 | 1.41 | 0.94 | 2.08 | 0.087 | 0.176 |
| rs3843478  | 5 | 100.183 | 1.05 | 1.02 | 1.1  | 0.012 | 1.49 | 1    | 2.15 | 0.036 | 0.129 |
| rs2544913  | 5 | 100.19  | 1.07 | 1.03 | 1.14 | 0.005 | 1.39 | 0.99 | 1.96 | 0.059 | 0.208 |
| rs2548278  | 5 | 100.193 | 1.07 | 1.03 | 1.14 | 0.005 | 1.39 | 0.99 | 1.95 | 0.059 | 0.209 |
| rs2548276  | 5 | 100.196 | 1.07 | 1.03 | 1.14 | 0.005 | 1.39 | 0.99 | 1.96 | 0.06  | 0.209 |
| rs1559059  | 5 | 100.197 | 1.07 | 1.03 | 1.14 | 0.006 | 1.42 | 0.98 | 2.01 | 0.061 | 0.197 |
| rs2548263  | 5 | 100.201 | 1.08 | 1.04 | 1.15 | 0.004 | 1.45 | 0.99 | 2.04 | 0.039 | 0.204 |
| rs10078934 | 5 | 100.202 | 1.07 | 1.03 | 1.14 | 0.006 | 1.42 | 0.98 | 2.02 | 0.059 | 0.196 |
| rs4703126  | 5 | 100.202 | 1.07 | 1.03 | 1.14 | 0.006 | 1.42 | 0.98 | 2.02 | 0.059 | 0.196 |
| rs2548279  | 5 | 100.205 | 1.08 | 1.04 | 1.15 | 0.004 | 1.45 | 0.99 | 2.05 | 0.039 | 0.203 |
| rs3756350  | 5 | 100.206 | 1.07 | 1.03 | 1.14 | 0.006 | 1.43 | 0.98 | 2.02 | 0.059 | 0.196 |
| rs3822366  | 5 | 100.207 | 1.07 | 1.03 | 1.14 | 0.006 | 1.43 | 0.98 | 2.02 | 0.058 | 0.196 |
| rs726971   | 5 | 100.21  | 1.07 | 1.03 | 1.14 | 0.006 | 1.43 | 0.98 | 2.02 | 0.058 | 0.196 |
| rs11738152 | 5 | 100.211 | 1.07 | 1.03 | 1.14 | 0.006 | 1.43 | 0.98 | 2.02 | 0.058 | 0.195 |
| rs13358325 | 5 | 100.211 | 1.07 | 1.03 | 1.14 | 0.006 | 1.43 | 0.98 | 2.02 | 0.058 | 0.195 |
| rs4703127  | 5 | 100.214 | 1.07 | 1.03 | 1.14 | 0.006 | 1.43 | 0.98 | 2.02 | 0.058 | 0.195 |

|            |   |         |      |      |      |       |      |      |      |       |       |
|------------|---|---------|------|------|------|-------|------|------|------|-------|-------|
| rs11742480 | 5 | 100.219 | 1.07 | 1.03 | 1.14 | 0.006 | 1.43 | 0.98 | 2.02 | 0.057 | 0.195 |
| rs11742504 | 5 | 100.219 | 1.07 | 1.03 | 1.14 | 0.006 | 1.43 | 0.99 | 2.02 | 0.057 | 0.195 |
| rs3776167  | 5 | 100.222 | 1.07 | 1.03 | 1.14 | 0.006 | 1.43 | 0.99 | 2.02 | 0.056 | 0.195 |
| rs3846627  | 5 | 100.222 | 1.07 | 1.03 | 1.14 | 0.006 | 1.43 | 0.99 | 2.02 | 0.056 | 0.195 |
| rs7737721  | 5 | 100.223 | 1.07 | 1.03 | 1.14 | 0.005 | 1.4  | 0.99 | 1.99 | 0.058 | 0.206 |
| rs966257   | 5 | 100.225 | 1.07 | 1.03 | 1.14 | 0.006 | 1.43 | 0.99 | 2.02 | 0.056 | 0.195 |
| rs3776168  | 5 | 100.227 | 1.08 | 1.04 | 1.15 | 0.005 | 1.45 | 1    | 2.05 | 0.038 | 0.203 |
| rs2059845  | 5 | 100.229 | 1.07 | 1.03 | 1.14 | 0.006 | 1.43 | 0.99 | 2.02 | 0.056 | 0.195 |
| rs11746550 | 5 | 100.232 | 1.05 | 0.83 | 1.42 | 0.737 | 1.38 | 0.12 | 4.36 | 0.736 | 0.143 |
| rs7703643  | 5 | 100.237 | 1.07 | 1.03 | 1.14 | 0.005 | 1.4  | 0.98 | 1.99 | 0.058 | 0.206 |
| rs10043056 | 5 | 100.239 | 1.07 | 1.03 | 1.14 | 0.006 | 1.43 | 0.98 | 2.02 | 0.056 | 0.195 |
| rs3776170  | 5 | 100.239 | 1.07 | 1.03 | 1.14 | 0.005 | 1.4  | 0.98 | 1.98 | 0.058 | 0.207 |
| rs3776171  | 5 | 100.24  | 1.07 | 1.03 | 1.13 | 0.007 | 1.38 | 0.96 | 1.97 | 0.084 | 0.198 |
| rs13355889 | 5 | 100.243 | 1.07 | 1.03 | 1.14 | 0.006 | 1.43 | 0.98 | 2.02 | 0.057 | 0.195 |
| rs11241752 | 5 | 100.248 | 1.07 | 1.03 | 1.14 | 0.006 | 1.43 | 0.99 | 2.03 | 0.055 | 0.196 |
| rs11241755 | 5 | 100.249 | 1.08 | 1.04 | 1.16 | 0.005 | 1.47 | 0.98 | 2.07 | 0.041 | 0.206 |
| rs11739418 | 5 | 100.249 | 1.05 | 0.82 | 1.47 | 0.727 | 1.4  | 0.12 | 4.48 | 0.724 | 0.149 |
| rs1423380  | 5 | 100.249 | 1.08 | 1.03 | 1.15 | 0.005 | 1.41 | 0.99 | 1.99 | 0.052 | 0.21  |
| rs2400313  | 5 | 100.255 | 1.08 | 1.03 | 1.15 | 0.006 | 1.46 | 1    | 2.07 | 0.044 | 0.201 |
| rs17725452 | 5 | 100.258 | 1.08 | 1.03 | 1.15 | 0.005 | 1.46 | 1    | 2.07 | 0.042 | 0.202 |
| rs3776176  | 5 | 100.26  | 1.08 | 1.04 | 1.16 | 0.004 | 1.44 | 0.99 | 1.99 | 0.044 | 0.215 |
| rs1423384  | 5 | 100.262 | 1.09 | 1.04 | 1.17 | 0.004 | 1.5  | 1.02 | 2.07 | 0.026 | 0.214 |
| rs3756352  | 5 | 100.265 | 1.08 | 1.04 | 1.16 | 0.005 | 1.47 | 1    | 2.08 | 0.038 | 0.205 |
| rs3756355  | 5 | 100.268 | 1.08 | 1.04 | 1.16 | 0.005 | 1.48 | 1    | 2.08 | 0.038 | 0.206 |
| rs1833862  | 5 | 100.271 | 1.08 | 1.04 | 1.16 | 0.005 | 1.48 | 1    | 2.08 | 0.037 | 0.206 |
| rs17782250 | 5 | 100.277 | 1.08 | 1.04 | 1.15 | 0.005 | 1.43 | 0.99 | 2.04 | 0.054 | 0.212 |
| rs4703131  | 5 | 100.277 | 1.08 | 1.04 | 1.16 | 0.005 | 1.48 | 1    | 2.08 | 0.036 | 0.207 |
| rs10214216 | 5 | 100.278 | 1.08 | 1.04 | 1.15 | 0.005 | 1.43 | 0.99 | 2.03 | 0.052 | 0.213 |
| rs4702993  | 5 | 100.282 | 1.08 | 1.04 | 1.15 | 0.005 | 1.43 | 0.99 | 2.03 | 0.051 | 0.214 |
| rs10059470 | 5 | 100.287 | 1.08 | 1.04 | 1.16 | 0.005 | 1.44 | 0.99 | 2.03 | 0.05  | 0.214 |
| rs11742323 | 5 | 100.292 | 1.06 | 1.03 | 1.11 | 0.001 | 1.4  | 0.95 | 1.96 | 0.073 | 0.171 |
| rs11748772 | 5 | 100.292 | 1.09 | 1.04 | 1.17 | 0.004 | 1.49 | 1.01 | 2.07 | 0.032 | 0.218 |
| rs10515303 | 5 | 100.303 | 1.07 | 1.03 | 1.13 | 0.008 | 1.53 | 1.04 | 2.14 | 0.022 | 0.16  |
| rs17726244 | 5 | 100.305 | 1.07 | 1.03 | 1.13 | 0.007 | 1.51 | 1.05 | 2.14 | 0.023 | 0.166 |
| rs13354021 | 5 | 100.307 | 1.06 | 1.03 | 1.11 | 0.003 | 1.45 | 1.02 | 2.05 | 0.034 | 0.161 |
| rs10035529 | 5 | 100.308 | 1.06 | 1.03 | 1.1  | 0.003 | 1.47 | 1.03 | 2.1  | 0.026 | 0.148 |
| rs17726346 | 5 | 100.308 | 1.06 | 1.02 | 1.12 | 0.009 | 1.56 | 1.06 | 2.19 | 0.017 | 0.146 |
| rs6893927  | 5 | 100.308 | 1.06 | 1.03 | 1.12 | 0.003 | 1.49 | 1.04 | 2.11 | 0.02  | 0.166 |
| rs4703134  | 5 | 100.313 | 1.05 | 1.03 | 1.1  | 0.003 | 1.48 | 1.04 | 2.12 | 0.023 | 0.141 |
| rs2161280  | 5 | 100.318 | 1.06 | 1.03 | 1.11 | 0.003 | 1.53 | 1.07 | 2.17 | 0.013 | 0.149 |
| rs17782915 | 5 | 100.332 | 1.09 | 1.04 | 1.16 | 0.002 | 1.51 | 0.99 | 2.11 | 0.029 | 0.21  |
| rs2216614  | 5 | 100.337 | 1.09 | 1.04 | 1.16 | 0.002 | 1.52 | 1    | 2.13 | 0.026 | 0.21  |
| rs3995468  | 5 | 100.342 | 1.09 | 1.04 | 1.16 | 0.002 | 1.49 | 0.98 | 2.1  | 0.032 | 0.215 |



|            |   |         |      |      |      |       |      |      |      |       |       |
|------------|---|---------|------|------|------|-------|------|------|------|-------|-------|
| rs1895467  | 5 | 100.346 | 1.09 | 1.05 | 1.16 | 0.001 | 1.45 | 1.01 | 2    | 0.032 | 0.218 |
| rs1345829  | 5 | 100.376 | 1.09 | 1.04 | 1.16 | 0.002 | 1.45 | 0.96 | 2.03 | 0.046 | 0.222 |
| rs2052564  | 5 | 100.382 | 1.09 | 1.04 | 1.16 | 0.002 | 1.43 | 0.94 | 2    | 0.056 | 0.225 |
| rs502652   | 5 | 100.407 | 1.08 | 1.04 | 1.15 | 0.002 | 1.43 | 0.92 | 2.02 | 0.073 | 0.218 |
| rs511870   | 5 | 100.412 | 1.07 | 1.04 | 1.12 | 0.001 | 1.36 | 0.96 | 1.86 | 0.064 | 0.203 |
| rs11739385 | 5 | 100.556 | 1.04 | 1.02 | 1.06 | 0.002 | 1.55 | 1.09 | 2.18 | 0.011 | 0.092 |
| rs1355595  | 5 | 100.567 | 1.04 | 1.02 | 1.07 | 0.002 | 1.55 | 1.08 | 2.19 | 0.012 | 0.093 |
| rs17796189 | 5 | 100.586 | 1.06 | 1.03 | 1.1  | 0.001 | 1.45 | 1.01 | 1.95 | 0.033 | 0.153 |
| rs12153330 | 5 | 100.606 | 1.04 | 1.02 | 1.06 | 0.002 | 1.63 | 1.07 | 2.32 | 0.012 | 0.083 |
| rs12187983 | 5 | 100.606 | 1.03 | 1.02 | 1.06 | 0.002 | 1.63 | 1.07 | 2.31 | 0.012 | 0.083 |
| rs1512252  | 5 | 100.606 | 1.04 | 1.02 | 1.06 | 0.002 | 1.63 | 1.07 | 2.33 | 0.012 | 0.083 |
| rs1512254  | 5 | 100.606 | 1.04 | 1.02 | 1.06 | 0.002 | 1.63 | 1.07 | 2.32 | 0.012 | 0.083 |
| rs1912993  | 5 | 100.609 | 1.04 | 1.02 | 1.07 | 0.002 | 1.66 | 1.08 | 2.39 | 0.011 | 0.086 |
| rs3957707  | 5 | 100.609 | 1.04 | 1.02 | 1.07 | 0.002 | 1.66 | 1.08 | 2.39 | 0.011 | 0.086 |
| rs11741574 | 5 | 100.61  | 1.04 | 1.02 | 1.07 | 0.002 | 1.67 | 1.08 | 2.4  | 0.01  | 0.087 |
| rs11241953 | 5 | 100.612 | 1.04 | 1.02 | 1.07 | 0.002 | 1.69 | 1.08 | 2.45 | 0.01  | 0.089 |
| rs12189225 | 5 | 100.614 | 1.04 | 1.02 | 1.08 | 0.002 | 1.71 | 1.09 | 2.5  | 0.01  | 0.091 |
| rs1459573  | 5 | 100.62  | 1.05 | 1.02 | 1.09 | 0.002 | 1.79 | 1.11 | 2.66 | 0.01  | 0.096 |

Table S8. Single-locus analyses for eQTL SNPs of *NDFIP1*. (Ch: chromosome; ME: mediation effect; AE: alternative effect; CI: confidence interval).

| SNP        | Ch | Location (Mb) | ME   | 95% CI |      | P-value | AE   | 95% CI |      | P-value | Proportion Of Mediation |
|------------|----|---------------|------|--------|------|---------|------|--------|------|---------|-------------------------|
| rs4912802  | 5  | 141.461       | 1.13 | 0.97   | 1.31 | 0.109   | 1.33 | 0.64   | 2.19 | 0.366   | 0.345                   |
| rs4912622  | 5  | 141.471       | 1.23 | 1.11   | 1.41 | 0.001   | 1.24 | 0.83   | 1.85 | 0.278   | 0.545                   |
| rs7705042  | 5  | 141.473       | 1.23 | 1.11   | 1.41 | 0.001   | 1.24 | 0.83   | 1.85 | 0.278   | 0.545                   |
| rs10875596 | 5  | 141.476       | 1.25 | 1.11   | 1.45 | 0.001   | 1.24 | 0.82   | 1.9  | 0.31    | 0.561                   |
| rs12109804 | 5  | 141.478       | 1.13 | 0.97   | 1.3  | 0.096   | 1.34 | 0.66   | 2.18 | 0.339   | 0.336                   |
| rs9324866  | 5  | 141.478       | 1.23 | 1.11   | 1.41 | 0.001   | 1.24 | 0.83   | 1.85 | 0.278   | 0.545                   |
| rs11749731 | 5  | 141.481       | 1.23 | 1.11   | 1.41 | 0.001   | 1.24 | 0.83   | 1.85 | 0.278   | 0.545                   |
| rs1835966  | 5  | 141.482       | 1.23 | 1.11   | 1.41 | 0.001   | 1.24 | 0.83   | 1.85 | 0.278   | 0.545                   |
| rs2338822  | 5  | 141.483       | 1.23 | 1.11   | 1.41 | 0.001   | 1.24 | 0.83   | 1.85 | 0.278   | 0.545                   |
| rs10463349 | 5  | 141.484       | 1.12 | 0.97   | 1.29 | 0.1     | 1.34 | 0.66   | 2.18 | 0.342   | 0.332                   |
| rs11739961 | 5  | 141.489       | 1.23 | 1.11   | 1.41 | 0.001   | 1.24 | 0.83   | 1.85 | 0.278   | 0.545                   |
| rs6860138  | 5  | 141.49        | 1.23 | 1.11   | 1.41 | 0.001   | 1.24 | 0.83   | 1.85 | 0.278   | 0.545                   |
| rs10515512 | 5  | 141.492       | 1.12 | 0.97   | 1.29 | 0.104   | 1.33 | 0.66   | 2.18 | 0.344   | 0.329                   |
| rs2338820  | 5  | 141.492       | 1.12 | 0.97   | 1.29 | 0.103   | 1.33 | 0.66   | 2.18 | 0.343   | 0.329                   |
| rs6863411  | 5  | 141.493       | 1.23 | 1.11   | 1.41 | 0.001   | 1.24 | 0.83   | 1.85 | 0.278   | 0.545                   |
| rs2043280  | 5  | 141.494       | 1.23 | 1.11   | 1.41 | 0.001   | 1.24 | 0.83   | 1.85 | 0.278   | 0.545                   |
| rs7709361  | 5  | 141.494       | 1.23 | 1.11   | 1.41 | 0.001   | 1.24 | 0.83   | 1.85 | 0.278   | 0.545                   |
| rs7723666  | 5  | 141.494       | 1.23 | 1.11   | 1.41 | 0.001   | 1.24 | 0.83   | 1.85 | 0.278   | 0.545                   |
| rs7725157  | 5  | 141.497       | 1.12 | 0.97   | 1.29 | 0.108   | 1.33 | 0.66   | 2.16 | 0.347   | 0.326                   |
| rs3765011  | 5  | 141.498       | 1.23 | 1.11   | 1.41 | 0.001   | 1.24 | 0.83   | 1.85 | 0.278   | 0.545                   |
| rs1062158  | 5  | 141.503       | 1.23 | 1.11   | 1.41 | 0.001   | 1.24 | 0.83   | 1.85 | 0.278   | 0.545                   |
| rs10068466 | 5  | 141.505       | 1.13 | 1.06   | 1.23 | 0.001   | 1.38 | 0.92   | 2.17 | 0.129   | 0.326                   |
| rs249641   | 5  | 141.505       | 1.23 | 1.11   | 1.41 | 0.001   | 1.25 | 0.83   | 1.87 | 0.278   | 0.544                   |
| rs249642   | 5  | 141.505       | 1.23 | 1.11   | 1.41 | 0.001   | 1.24 | 0.83   | 1.86 | 0.279   | 0.544                   |
| rs249643   | 5  | 141.505       | 1.23 | 1.11   | 1.41 | 0.001   | 1.24 | 0.83   | 1.86 | 0.278   | 0.544                   |
| rs181826   | 5  | 141.506       | 1.24 | 1.11   | 1.42 | 0.001   | 1.25 | 0.83   | 1.88 | 0.278   | 0.543                   |
| rs166079   | 5  | 141.509       | 1.24 | 1.11   | 1.42 | 0.001   | 1.25 | 0.82   | 1.88 | 0.278   | 0.542                   |
| rs249638   | 5  | 141.511       | 1.24 | 1.11   | 1.42 | 0.001   | 1.25 | 0.83   | 1.89 | 0.277   | 0.541                   |
| rs449454   | 5  | 141.513       | 1.24 | 1.11   | 1.42 | 0.001   | 1.25 | 0.83   | 1.89 | 0.277   | 0.54                    |
| rs10463350 | 5  | 141.514       | 1.13 | 0.97   | 1.32 | 0.099   | 1.43 | 0.67   | 2.33 | 0.263   | 0.31                    |
| rs249681   | 5  | 141.518       | 1.23 | 1.11   | 1.41 | 0.001   | 1.26 | 0.83   | 1.89 | 0.27    | 0.534                   |
| rs2338819  | 5  | 141.52        | 0.85 | 0.77   | 0.93 | 0.001   | 0.78 | 0.44   | 1.13 | 0.283   | 0.335                   |
| rs249677   | 5  | 141.52        | 0.81 | 0.71   | 0.89 | 0       | 0.76 | 0.47   | 1.1  | 0.21    | 0.378                   |
| rs2915866  | 5  | 141.524       | 0.99 | 0.97   | 1    | 0.036   | 1.16 | 0.76   | 1.65 | 0.459   | -0.105                  |
| rs4100171  | 5  | 141.524       | 1.14 | 0.98   | 1.33 | 0.094   | 1.45 | 0.71   | 2.34 | 0.235   | 0.31                    |
| rs2288820  | 5  | 141.528       | 1.04 | 0.99   | 1.1  | 0.097   | 1.02 | 0.55   | 1.56 | 0.93    | 0.65                    |
| rs2288822  | 5  | 141.528       | 0.89 | 0.82   | 0.95 | 0.001   | 0.73 | 0.43   | 1.07 | 0.164   | 0.234                   |
| rs10074925 | 5  | 141.529       | 0.86 | 0.78   | 0.94 | 0.002   | 0.79 | 0.46   | 1.17 | 0.325   | 0.344                   |

|            |   |         |      |      |      |       |      |      |      |       |       |
|------------|---|---------|------|------|------|-------|------|------|------|-------|-------|
| rs6892764  | 5 | 141.529 | 1.04 | 0.99 | 1.1  | 0.098 | 1.02 | 0.54 | 1.56 | 0.938 | 0.672 |
| rs6892781  | 5 | 141.529 | 1.04 | 0.99 | 1.1  | 0.099 | 1.02 | 0.54 | 1.56 | 0.94  | 0.68  |
| rs17649451 | 5 | 141.53  | 0.86 | 0.78 | 0.94 | 0.001 | 0.8  | 0.47 | 1.18 | 0.348 | 0.357 |
| rs3764     | 5 | 141.531 | 0.86 | 0.78 | 0.94 | 0.001 | 0.82 | 0.49 | 1.21 | 0.392 | 0.383 |
| rs11742584 | 5 | 141.532 | 0.87 | 0.78 | 0.94 | 0.001 | 0.82 | 0.49 | 1.22 | 0.403 | 0.387 |
| rs3899510  | 5 | 141.532 | 0.86 | 0.78 | 0.94 | 0.001 | 0.82 | 0.49 | 1.21 | 0.396 | 0.385 |
| rs11745706 | 5 | 141.533 | 0.87 | 0.79 | 0.94 | 0.001 | 0.83 | 0.49 | 1.22 | 0.414 | 0.389 |
| rs9324871  | 5 | 141.536 | 1.12 | 0.97 | 1.29 | 0.119 | 1.32 | 0.67 | 2.22 | 0.353 | 0.328 |
| rs13153236 | 5 | 141.544 | 1.11 | 0.96 | 1.3  | 0.17  | 1.31 | 0.65 | 2.22 | 0.39  | 0.323 |
| rs17098224 | 5 | 141.548 | 0.89 | 0.81 | 0.95 | 0.002 | 0.87 | 0.48 | 1.33 | 0.606 | 0.44  |

Table S9. Single-locus analyses for eQTL SNPs of *MANEA* (1554193\_s\_at). (Ch: chromosome; ME: mediation effect; AE: alternative effect; CI: confidence interval).

| SNP        | Ch | Location (Mb) | ME   | 95% CI |      | P-value | AE   | 95% CI |      | P-value | Proportion of Mediation |
|------------|----|---------------|------|--------|------|---------|------|--------|------|---------|-------------------------|
| rs13196543 | 6  | 96.081        | 0.92 | 0.79   | 1.02 | 0.225   | 0.99 | 0.19   | 1.96 | 0.987   | 0.881                   |
| rs9481199  | 6  | 96.101        | 1    | 1      | 1    | 0.165   | 1.2  | 0.73   | 1.76 | 0.438   | -0.008                  |
| rs4435952  | 6  | 96.102        | 1.01 | 1      | 1.03 | 0.009   | 1.34 | 0.92   | 1.91 | 0.114   | 0.054                   |
| rs7744714  | 6  | 96.102        | 1    | 1      | 1    | 0.008   | 1.37 | 0.95   | 1.89 | 0.079   | 0                       |
| rs9374321  | 6  | 96.106        | 1.01 | 1      | 1.01 | 0.017   | 1.38 | 0.92   | 1.93 | 0.089   | 0.019                   |
| rs9487909  | 6  | 96.106        | 1    | 0.97   | 1.02 | 0.72    | 1.33 | 0.63   | 2.04 | 0.364   | -0.02                   |
| rs7749364  | 6  | 96.109        | 1    | 0.99   | 1    | 0.191   | 1.14 | 0.69   | 1.69 | 0.587   | -0.024                  |
| rs9488059  | 6  | 96.113        | 1    | 0.96   | 1.02 | 0.741   | 1.3  | 0.61   | 1.98 | 0.405   | -0.023                  |
| rs9488061  | 6  | 96.113        | 1    | 0.96   | 1.02 | 0.75    | 1.29 | 0.6    | 1.96 | 0.427   | -0.024                  |
| rs13203302 | 6  | 96.114        | 0.92 | 0.74   | 1.06 | 0.369   | 1.51 | 0.24   | 2.96 | 0.596   | -0.31                   |
| rs9398365  | 6  | 96.12         | 1.01 | 1      | 1.03 | 0.018   | 1.47 | 1.03   | 2.07 | 0.031   | 0.044                   |
| rs6932267  | 6  | 96.121        | 1.01 | 1      | 1.03 | 0.018   | 1.47 | 1.03   | 2.06 | 0.033   | 0.043                   |
| rs9372382  | 6  | 96.121        | 1.01 | 1      | 1.03 | 0.018   | 1.47 | 1.03   | 2.07 | 0.031   | 0.044                   |
| rs9398367  | 6  | 96.121        | 1.01 | 1      | 1.03 | 0.018   | 1.47 | 1.03   | 2.07 | 0.032   | 0.044                   |
| rs9488308  | 6  | 96.122        | 1.01 | 1      | 1.03 | 0.018   | 1.47 | 1.03   | 2.05 | 0.034   | 0.042                   |
| rs9320497  | 6  | 96.128        | 1.01 | 1      | 1.03 | 0.018   | 1.47 | 1.03   | 2.05 | 0.034   | 0.042                   |
| rs6937479  | 6  | 96.13         | 1    | 1      | 1.01 | 0.008   | 1.59 | 1.14   | 2.17 | 0.006   | 0.012                   |
| rs9374502  | 6  | 96.131        | 1.01 | 1      | 1.02 | 0.006   | 1.49 | 1.08   | 2.08 | 0.018   | 0.028                   |
| rs9384949  | 6  | 96.138        | 1.01 | 1      | 1.02 | 0.018   | 1.46 | 1.02   | 2.04 | 0.037   | 0.039                   |
| rs9387352  | 6  | 96.139        | 1.01 | 1      | 1.02 | 0.018   | 1.45 | 1.02   | 2.03 | 0.037   | 0.039                   |
| rs7758062  | 6  | 96.14         | 1    | 1      | 1.01 | 0.028   | 1.45 | 1.01   | 2.04 | 0.042   | 0.008                   |
| rs13205436 | 6  | 96.141        | 0.96 | 0.87   | 1.01 | 0.267   | 1.46 | 0.08   | 2.82 | 0.706   | -0.149                  |
| rs9374586  | 6  | 96.142        | 1    | 1      | 1    | 0.029   | 1.45 | 1      | 2.05 | 0.042   | 0                       |
| rs6940020  | 6  | 96.143        | 1.01 | 1      | 1.02 | 0.017   | 1.45 | 1      | 2.02 | 0.039   | 0.039                   |
| rs12525680 | 6  | 96.144        | 1    | 1      | 1    | 0.091   | 0.9  | 0.54   | 1.29 | 0.627   | 0.013                   |
| rs9372457  | 6  | 96.145        | 1.01 | 1      | 1.02 | 0.017   | 1.45 | 1      | 2.02 | 0.039   | 0.039                   |
| rs9400893  | 6  | 96.145        | 1.01 | 1      | 1.02 | 0.017   | 1.45 | 1      | 2.02 | 0.039   | 0.039                   |
| rs13192906 | 6  | 96.146        | 0.96 | 0.87   | 1.01 | 0.274   | 1.44 | 0.08   | 2.79 | 0.722   | -0.154                  |
| rs9488910  | 6  | 96.146        | 1.01 | 1      | 1.02 | 0.006   | 1.48 | 1.07   | 2.05 | 0.021   | 0.033                   |
| rs7773709  | 6  | 96.148        | 1.01 | 1      | 1.02 | 0.017   | 1.45 | 1      | 2.02 | 0.039   | 0.039                   |
| rs9320566  | 6  | 96.148        | 1.01 | 1      | 1.02 | 0.017   | 1.45 | 1      | 2.02 | 0.039   | 0.039                   |
| rs7757276  | 6  | 96.149        | 0.99 | 0.96   | 1.03 | 0.758   | 1.28 | 0.61   | 1.96 | 0.437   | -0.026                  |
| rs4466257  | 6  | 96.15         | 1.01 | 1      | 1.02 | 0.017   | 1.45 | 1      | 2.02 | 0.039   | 0.039                   |
| rs9387442  | 6  | 96.153        | 1.02 | 1      | 1.03 | 0.024   | 1.72 | 1.12   | 2.5  | 0.009   | 0.035                   |
| rs4486026  | 6  | 96.155        | 1.01 | 1      | 1.02 | 0.017   | 1.48 | 1.03   | 2.07 | 0.027   | 0.038                   |
| rs1133503  | 6  | 96.161        | 1.01 | 1      | 1.02 | 0.017   | 1.45 | 1      | 2.02 | 0.039   | 0.039                   |
| rs9387522  | 6  | 96.162        | 1.01 | 1      | 1.02 | 0.017   | 1.45 | 1      | 2.02 | 0.039   | 0.039                   |
| rs9387567  | 6  | 96.165        | 1.01 | 1      | 1.01 | 0.008   | 1.57 | 1.12   | 2.14 | 0.007   | 0.019                   |

|            |   |        |      |      |      |       |      |      |      |       |        |
|------------|---|--------|------|------|------|-------|------|------|------|-------|--------|
| rs4339467  | 6 | 96.168 | 1.01 | 1    | 1.02 | 0.006 | 1.47 | 1.07 | 2.04 | 0.021 | 0.033  |
| rs9387591  | 6 | 96.168 | 1.01 | 1    | 1.02 | 0.017 | 1.45 | 1    | 2.02 | 0.039 | 0.039  |
| rs9387601  | 6 | 96.17  | 1.01 | 1    | 1.02 | 0.006 | 1.47 | 1.07 | 2.04 | 0.021 | 0.033  |
| rs9387603  | 6 | 96.17  | 1.01 | 1    | 1.02 | 0.017 | 1.45 | 1    | 2.02 | 0.039 | 0.039  |
| rs9387605  | 6 | 96.17  | 1.01 | 1    | 1.02 | 0.017 | 1.45 | 1    | 2.02 | 0.039 | 0.039  |
| rs9489578  | 6 | 96.172 | 1.01 | 1    | 1.02 | 0.017 | 1.45 | 1    | 2.02 | 0.039 | 0.039  |
| rs7774322  | 6 | 96.173 | 1.01 | 1    | 1.02 | 0.017 | 1.45 | 1    | 2.02 | 0.039 | 0.039  |
| rs12333032 | 6 | 96.174 | 1.01 | 1    | 1.02 | 0.017 | 1.45 | 1    | 2.02 | 0.039 | 0.039  |
| rs13209376 | 6 | 96.177 | 0.96 | 0.87 | 1.01 | 0.277 | 1.43 | 0.08 | 2.79 | 0.727 | -0.156 |
| rs9481950  | 6 | 96.178 | 1    | 1    | 1    | 0.029 | 1.45 | 1    | 2.06 | 0.041 | 0.002  |
| rs6926916  | 6 | 96.181 | 1.01 | 1    | 1.02 | 0.006 | 1.48 | 1.07 | 2.07 | 0.02  | 0.034  |
| rs6937569  | 6 | 96.188 | 1.01 | 1    | 1.02 | 0.006 | 1.49 | 1.07 | 2.08 | 0.02  | 0.034  |
| rs4413619  | 6 | 96.19  | 0.97 | 0.94 | 0.99 | 0.074 | 0.8  | 0.04 | 1.46 | 0.816 | 0.096  |
| rs9490118  | 6 | 96.192 | 1    | 0.96 | 1.02 | 0.749 | 1.38 | 0.65 | 2.14 | 0.316 | -0.018 |
| rs12525999 | 6 | 96.197 | 1    | 0.99 | 1.01 | 0.834 | 1.61 | 0.86 | 2.39 | 0.086 | -0.002 |
| rs12529535 | 6 | 96.198 | 1    | 0.99 | 1.01 | 0.834 | 1.62 | 0.86 | 2.39 | 0.086 | -0.002 |
| rs11758159 | 6 | 96.254 | 0.96 | 0.92 | 0.99 | 0.042 | 0.67 | 0.41 | 0.89 | 0.055 | 0.077  |
| rs12662075 | 6 | 96.279 | 0.96 | 0.92 | 0.99 | 0.041 | 0.66 | 0.4  | 0.88 | 0.047 | 0.07   |
| rs7765615  | 6 | 96.288 | 0.96 | 0.92 | 0.99 | 0.041 | 0.66 | 0.4  | 0.88 | 0.047 | 0.069  |
| rs4840033  | 6 | 96.335 | 0.95 | 0.91 | 0.99 | 0.021 | 0.57 | 0.36 | 0.78 | 0.004 | 0.058  |
| rs17774669 | 6 | 96.338 | 0.95 | 0.91 | 0.99 | 0.022 | 0.57 | 0.36 | 0.78 | 0.004 | 0.058  |
| rs12530302 | 6 | 96.34  | 0.95 | 0.91 | 0.99 | 0.021 | 0.57 | 0.37 | 0.78 | 0.004 | 0.059  |
| rs13206934 | 6 | 96.342 | 0.95 | 0.91 | 0.99 | 0.022 | 0.57 | 0.37 | 0.79 | 0.004 | 0.059  |
| rs12200752 | 6 | 96.344 | 0.95 | 0.9  | 0.99 | 0.028 | 0.59 | 0.38 | 0.81 | 0.006 | 0.068  |
| rs1857482  | 6 | 96.346 | 0.95 | 0.91 | 0.99 | 0.021 | 0.57 | 0.37 | 0.79 | 0.004 | 0.06   |
| rs13205985 | 6 | 96.352 | 0.95 | 0.91 | 0.99 | 0.021 | 0.58 | 0.37 | 0.79 | 0.004 | 0.061  |
| rs10872473 | 6 | 96.356 | 0.95 | 0.91 | 0.99 | 0.021 | 0.58 | 0.37 | 0.8  | 0.006 | 0.062  |
| rs4493748  | 6 | 96.358 | 0.95 | 0.91 | 0.99 | 0.021 | 0.58 | 0.36 | 0.8  | 0.008 | 0.063  |
| rs13203882 | 6 | 96.359 | 0.95 | 0.91 | 0.99 | 0.021 | 0.58 | 0.36 | 0.81 | 0.008 | 0.063  |

Table S10. Single-locus analyses for eQTL SNPs of 229319\_at. (Ch: chromosome; ME: mediation effect; AE: alternative effect; CI: confidence interval).

| SNP       | Ch | Location (Mb) | ME   | 95% CI |      | P-value | AE   | 95% CI |      | P-value | Proportion of Mediation |
|-----------|----|---------------|------|--------|------|---------|------|--------|------|---------|-------------------------|
| rs2679650 | 6  | 122.437       | 0.67 | 0.48   | 0.84 | 0.006   | 1.12 | 0.65   | 2.56 | 0.752   | 1.5                     |
| rs2816096 | 6  | 122.439       | 0.68 | 0.49   | 0.84 | 0.005   | 1.12 | 0.66   | 2.5  | 0.75    | 1.5                     |
| rs2816095 | 6  | 122.439       | 0.68 | 0.49   | 0.84 | 0.005   | 1.12 | 0.66   | 2.49 | 0.749   | 1.5                     |
| rs2315812 | 6  | 122.439       | 0.68 | 0.48   | 0.84 | 0.006   | 1.1  | 0.66   | 2.5  | 0.787   | 1.41                    |
| rs2684247 | 6  | 122.44        | 0.68 | 0.48   | 0.84 | 0.006   | 1.1  | 0.66   | 2.5  | 0.787   | 1.41                    |
| rs7738997 | 6  | 122.44        | 0.68 | 0.49   | 0.84 | 0.006   | 1.1  | 0.66   | 2.5  | 0.786   | 1.41                    |
| rs2816094 | 6  | 122.441       | 0.68 | 0.49   | 0.84 | 0.006   | 1.1  | 0.66   | 2.5  | 0.784   | 1.41                    |
| rs2816092 | 6  | 122.442       | 0.68 | 0.49   | 0.84 | 0.006   | 1.1  | 0.66   | 2.5  | 0.782   | 1.42                    |
| rs2679708 | 6  | 122.442       | 0.68 | 0.49   | 0.84 | 0.006   | 1.1  | 0.66   | 2.5  | 0.783   | 1.42                    |
| rs2816088 | 6  | 122.445       | 0.68 | 0.49   | 0.84 | 0.006   | 1.12 | 0.66   | 2.55 | 0.762   | 1.47                    |
| rs2684235 | 6  | 122.445       | 0.67 | 0.48   | 0.84 | 0.007   | 1.1  | 0.64   | 2.56 | 0.806   | 1.36                    |
| rs2684241 | 6  | 122.453       | 0.7  | 0.5    | 0.86 | 0.009   | 0.98 | 0.6    | 2.09 | 0.951   | 0.935                   |
| rs2198863 | 6  | 122.454       | 0.7  | 0.5    | 0.86 | 0.009   | 0.98 | 0.6    | 2.09 | 0.95    | 0.934                   |
| rs2684244 | 6  | 122.456       | 0.7  | 0.5    | 0.86 | 0.009   | 0.98 | 0.6    | 2.09 | 0.951   | 0.936                   |
| rs2606604 | 6  | 122.456       | 0.7  | 0.51   | 0.86 | 0.008   | 0.98 | 0.6    | 2.08 | 0.953   | 0.938                   |
| rs1521223 | 6  | 122.457       | 0.7  | 0.51   | 0.86 | 0.008   | 0.98 | 0.6    | 2.09 | 0.955   | 0.941                   |
| rs2606611 | 6  | 122.457       | 0.7  | 0.51   | 0.86 | 0.008   | 0.98 | 0.61   | 2.09 | 0.956   | 0.942                   |
| rs1402537 | 6  | 122.458       | 0.7  | 0.51   | 0.86 | 0.009   | 0.96 | 0.59   | 2.08 | 0.897   | 0.872                   |
| rs2606622 | 6  | 122.459       | 0.7  | 0.51   | 0.86 | 0.008   | 0.98 | 0.61   | 2.09 | 0.958   | 0.945                   |
| rs2606626 | 6  | 122.46        | 0.7  | 0.51   | 0.86 | 0.008   | 0.98 | 0.61   | 2.09 | 0.959   | 0.945                   |
| rs2816085 | 6  | 122.46        | 0.7  | 0.51   | 0.86 | 0.008   | 0.98 | 0.61   | 2.09 | 0.961   | 0.948                   |
| rs1379094 | 6  | 122.461       | 0.7  | 0.51   | 0.86 | 0.008   | 0.98 | 0.61   | 2.08 | 0.962   | 0.949                   |
| rs2606630 | 6  | 122.462       | 0.7  | 0.51   | 0.86 | 0.008   | 0.98 | 0.61   | 2.08 | 0.962   | 0.949                   |
| rs2679703 | 6  | 122.462       | 0.7  | 0.51   | 0.86 | 0.008   | 0.99 | 0.61   | 2.08 | 0.963   | 0.952                   |
| rs2606631 | 6  | 122.462       | 0.71 | 0.52   | 0.87 | 0.008   | 0.95 | 0.58   | 1.97 | 0.879   | 0.857                   |
| rs2606632 | 6  | 122.463       | 0.7  | 0.52   | 0.85 | 0.006   | 1.01 | 0.63   | 2.14 | 0.969   | 1.04                    |
| rs2606634 | 6  | 122.463       | 0.71 | 0.51   | 0.86 | 0.008   | 0.99 | 0.62   | 2.07 | 0.969   | 0.959                   |
| rs2606642 | 6  | 122.467       | 0.69 | 0.48   | 0.86 | 0.011   | 1.05 | 0.64   | 2.44 | 0.887   | 1.19                    |
| rs2606643 | 6  | 122.467       | 0.71 | 0.52   | 0.86 | 0.008   | 0.98 | 0.62   | 2.05 | 0.96    | 0.947                   |
| rs2606644 | 6  | 122.468       | 0.71 | 0.52   | 0.86 | 0.008   | 0.98 | 0.62   | 2.05 | 0.959   | 0.946                   |
| rs720205  | 6  | 122.47        | 0.71 | 0.53   | 0.86 | 0.007   | 0.99 | 0.63   | 2.04 | 0.963   | 0.951                   |
| rs1379095 | 6  | 122.47        | 0.71 | 0.53   | 0.86 | 0.007   | 0.98 | 0.62   | 2.03 | 0.958   | 0.945                   |
| rs2816165 | 6  | 122.478       | 0.71 | 0.51   | 0.87 | 0.012   | 0.93 | 0.58   | 2    | 0.829   | 0.793                   |
| rs2606647 | 6  | 122.482       | 0.71 | 0.52   | 0.88 | 0.012   | 0.89 | 0.54   | 1.92 | 0.733   | 0.708                   |
| rs2606648 | 6  | 122.482       | 0.71 | 0.52   | 0.88 | 0.012   | 0.89 | 0.54   | 1.93 | 0.733   | 0.708                   |
| rs2045352 | 6  | 122.483       | 0.71 | 0.51   | 0.87 | 0.012   | 0.93 | 0.58   | 2.01 | 0.827   | 0.792                   |
| rs1379098 | 6  | 122.485       | 0.7  | 0.51   | 0.87 | 0.01    | 0.91 | 0.54   | 2.01 | 0.763   | 0.739                   |
| rs2816159 | 6  | 122.485       | 0.71 | 0.51   | 0.87 | 0.012   | 0.93 | 0.57   | 2.02 | 0.823   | 0.789                   |

|            |   |         |      |      |      |       |      |      |      |       |       |
|------------|---|---------|------|------|------|-------|------|------|------|-------|-------|
| rs2606650  | 6 | 122.486 | 0.71 | 0.51 | 0.87 | 0.012 | 0.93 | 0.57 | 2.02 | 0.823 | 0.788 |
| rs2816157  | 6 | 122.487 | 0.71 | 0.51 | 0.87 | 0.012 | 0.93 | 0.57 | 2.03 | 0.822 | 0.788 |
| rs2816156  | 6 | 122.487 | 0.71 | 0.5  | 0.87 | 0.012 | 0.93 | 0.57 | 2.03 | 0.822 | 0.788 |
| rs1456706  | 6 | 122.498 | 0.7  | 0.5  | 0.86 | 0.013 | 0.92 | 0.57 | 2.02 | 0.818 | 0.785 |
| rs2606651  | 6 | 122.499 | 0.7  | 0.5  | 0.86 | 0.013 | 0.92 | 0.57 | 2.03 | 0.818 | 0.784 |
| rs2606656  | 6 | 122.516 | 0.69 | 0.48 | 0.85 | 0.009 | 0.95 | 0.57 | 2.11 | 0.872 | 0.846 |
| rs2606624  | 6 | 122.532 | 0.69 | 0.47 | 0.85 | 0.013 | 0.95 | 0.57 | 2.14 | 0.874 | 0.844 |
| rs2816142  | 6 | 122.54  | 0.69 | 0.47 | 0.85 | 0.012 | 0.94 | 0.57 | 2.13 | 0.871 | 0.841 |
| rs2816139  | 6 | 122.545 | 0.69 | 0.47 | 0.85 | 0.012 | 0.94 | 0.57 | 2.12 | 0.871 | 0.841 |
| rs2606617  | 6 | 122.545 | 1.48 | 1.18 | 2.23 | 0.014 | 1.35 | 0.69 | 2    | 0.334 | 0.649 |
| rs2606609  | 6 | 122.553 | 0.69 | 0.47 | 0.85 | 0.012 | 0.96 | 0.57 | 2.14 | 0.896 | 0.869 |
| rs2606608  | 6 | 122.558 | 0.69 | 0.47 | 0.85 | 0.012 | 0.96 | 0.58 | 2.14 | 0.905 | 0.879 |
| rs2816078  | 6 | 122.565 | 0.69 | 0.47 | 0.85 | 0.011 | 0.97 | 0.59 | 2.15 | 0.931 | 0.91  |
| rs2606598  | 6 | 122.569 | 0.69 | 0.47 | 0.85 | 0.011 | 0.98 | 0.59 | 2.17 | 0.945 | 0.927 |
| rs2816146  | 6 | 122.57  | 0.57 | 0.35 | 0.75 | 0.004 | 1.15 | 0.61 | 3.14 | 0.747 | 1.42  |
| rs2045354  | 6 | 122.572 | 0.69 | 0.47 | 0.85 | 0.011 | 0.98 | 0.59 | 2.18 | 0.955 | 0.939 |
| rs9490411  | 6 | 122.58  | 0.69 | 0.48 | 0.85 | 0.01  | 0.99 | 0.59 | 2.2  | 0.983 | 0.976 |
| rs9320856  | 6 | 122.583 | 0.69 | 0.48 | 0.85 | 0.01  | 0.99 | 0.59 | 2.2  | 0.983 | 0.977 |
| rs928011   | 6 | 122.612 | 0.69 | 0.48 | 0.85 | 0.01  | 0.99 | 0.6  | 2.2  | 0.986 | 0.981 |
| rs9632500  | 6 | 122.614 | 0.69 | 0.49 | 0.85 | 0.01  | 0.99 | 0.6  | 2.2  | 0.987 | 0.981 |
| rs696650   | 6 | 122.624 | 0.69 | 0.49 | 0.85 | 0.01  | 1    | 0.6  | 2.19 | 0.987 | 0.983 |
| rs170422   | 6 | 122.624 | 0.68 | 0.48 | 0.84 | 0.008 | 1.06 | 0.64 | 2.37 | 0.879 | 1.2   |
| rs225071   | 6 | 122.627 | 0.69 | 0.49 | 0.85 | 0.009 | 1    | 0.6  | 2.19 | 0.988 | 0.984 |
| rs225074   | 6 | 122.628 | 0.69 | 0.47 | 0.84 | 0.009 | 0.95 | 0.56 | 2.14 | 0.888 | 0.859 |
| rs225087   | 6 | 122.641 | 0.69 | 0.48 | 0.84 | 0.008 | 1.02 | 0.62 | 2.26 | 0.961 | 1.06  |
| rs225088   | 6 | 122.641 | 0.68 | 0.48 | 0.84 | 0.007 | 1.06 | 0.65 | 2.42 | 0.86  | 1.23  |
| rs225080   | 6 | 122.659 | 0.7  | 0.48 | 0.87 | 0.018 | 1.04 | 0.64 | 2.62 | 0.927 | 1.13  |
| rs7752093  | 6 | 122.664 | 0.69 | 0.48 | 0.85 | 0.009 | 1.02 | 0.62 | 2.31 | 0.955 | 1.07  |
| rs9401508  | 6 | 122.692 | 0.81 | 0.7  | 0.91 | 0.002 | 1.03 | 0.64 | 1.79 | 0.91  | 1.18  |
| rs7771090  | 6 | 122.703 | 0.69 | 0.49 | 0.85 | 0.01  | 1    | 0.61 | 2.26 | 0.992 | 1.01  |
| rs17729938 | 6 | 122.703 | 0.69 | 0.49 | 0.85 | 0.01  | 1    | 0.61 | 2.26 | 0.993 | 1.01  |
| rs7767993  | 6 | 122.706 | 0.69 | 0.49 | 0.85 | 0.01  | 1    | 0.61 | 2.26 | 0.993 | 1.01  |
| rs1339532  | 6 | 122.708 | 0.69 | 0.49 | 0.85 | 0.01  | 1    | 0.61 | 2.26 | 0.993 | 1.01  |
| rs12201010 | 6 | 122.709 | 0.69 | 0.49 | 0.85 | 0.01  | 1    | 0.61 | 2.26 | 0.993 | 1.01  |
| rs17662514 | 6 | 122.709 | 0.69 | 0.49 | 0.85 | 0.01  | 1    | 0.61 | 2.26 | 0.993 | 1.01  |
| rs1339533  | 6 | 122.712 | 0.69 | 0.49 | 0.85 | 0.01  | 1.01 | 0.61 | 2.27 | 0.985 | 1.02  |
| rs9490430  | 6 | 122.724 | 0.68 | 0.46 | 0.86 | 0.017 | 1    | 0.58 | 2.47 | 0.998 | 0.997 |
| rs11154070 | 6 | 122.726 | 0.68 | 0.47 | 0.85 | 0.011 | 1.05 | 0.63 | 2.43 | 0.892 | 1.18  |
| rs11154072 | 6 | 122.737 | 0.68 | 0.47 | 0.84 | 0.01  | 1.1  | 0.65 | 2.57 | 0.793 | 1.4   |
| rs12189881 | 6 | 122.738 | 0.68 | 0.47 | 0.85 | 0.01  | 1.1  | 0.65 | 2.56 | 0.795 | 1.39  |
| rs11154077 | 6 | 122.75  | 0.68 | 0.47 | 0.85 | 0.01  | 1.1  | 0.64 | 2.55 | 0.803 | 1.38  |
| rs11154078 | 6 | 122.75  | 0.68 | 0.47 | 0.85 | 0.01  | 1.1  | 0.64 | 2.55 | 0.804 | 1.37  |
| rs510471   | 6 | 122.755 | 0.68 | 0.47 | 0.85 | 0.01  | 1.09 | 0.63 | 2.5  | 0.813 | 1.35  |

|            |   |         |      |      |      |       |      |      |      |       |       |
|------------|---|---------|------|------|------|-------|------|------|------|-------|-------|
| rs472070   | 6 | 122.756 | 0.82 | 0.71 | 0.91 | 0.002 | 0.98 | 0.61 | 1.65 | 0.947 | 0.915 |
| rs477425   | 6 | 122.756 | 0.68 | 0.47 | 0.85 | 0.01  | 1.09 | 0.63 | 2.49 | 0.817 | 1.34  |
| rs571706   | 6 | 122.757 | 0.69 | 0.48 | 0.85 | 0.012 | 1.06 | 0.61 | 2.52 | 0.882 | 1.21  |
| rs549215   | 6 | 122.758 | 0.83 | 0.72 | 0.92 | 0.002 | 0.98 | 0.6  | 1.6  | 0.94  | 0.899 |
| rs563084   | 6 | 122.76  | 0.68 | 0.47 | 0.85 | 0.009 | 1.09 | 0.63 | 2.48 | 0.819 | 1.33  |
| rs6926219  | 6 | 122.763 | 0.89 | 0.83 | 0.95 | 0.001 | 0.8  | 0.54 | 1.15 | 0.233 | 0.294 |
| rs1741820  | 6 | 122.763 | 0.89 | 0.83 | 0.95 | 0.001 | 0.8  | 0.54 | 1.15 | 0.234 | 0.295 |
| rs17199931 | 6 | 122.773 | 0.81 | 0.66 | 0.92 | 0.011 | 1.09 | 0.42 | 1.76 | 0.804 | 1.75  |
| rs549302   | 6 | 122.777 | 0.89 | 0.83 | 0.95 | 0.001 | 0.8  | 0.54 | 1.15 | 0.231 | 0.293 |
| rs3799545  | 6 | 122.777 | 0.81 | 0.66 | 0.92 | 0.011 | 1.09 | 0.43 | 1.76 | 0.802 | 1.76  |
| rs502071   | 6 | 122.781 | 0.68 | 0.46 | 0.85 | 0.013 | 0.99 | 0.57 | 2.29 | 0.968 | 0.956 |
| rs564611   | 6 | 122.781 | 0.89 | 0.83 | 0.95 | 0.001 | 0.8  | 0.54 | 1.14 | 0.226 | 0.291 |
| rs578868   | 6 | 122.784 | 0.89 | 0.83 | 0.95 | 0.001 | 0.79 | 0.54 | 1.13 | 0.224 | 0.29  |
| rs492250   | 6 | 122.785 | 0.68 | 0.47 | 0.85 | 0.009 | 1.08 | 0.63 | 2.42 | 0.837 | 1.28  |
| rs556439   | 6 | 122.787 | 0.82 | 0.71 | 0.91 | 0.003 | 0.77 | 0.52 | 1.25 | 0.245 | 0.371 |
| rs9320872  | 6 | 122.788 | 0.68 | 0.47 | 0.85 | 0.009 | 1.08 | 0.63 | 2.42 | 0.84  | 1.28  |
| rs576247   | 6 | 122.789 | 0.89 | 0.83 | 0.95 | 0.001 | 0.79 | 0.53 | 1.14 | 0.221 | 0.289 |
| rs502252   | 6 | 122.799 | 0.68 | 0.47 | 0.85 | 0.009 | 1.07 | 0.63 | 2.43 | 0.841 | 1.28  |
| rs577838   | 6 | 122.801 | 0.7  | 0.5  | 0.86 | 0.007 | 0.92 | 0.55 | 1.82 | 0.805 | 0.786 |
| rs487098   | 6 | 122.808 | 0.9  | 0.83 | 0.95 | 0.001 | 0.79 | 0.53 | 1.14 | 0.223 | 0.287 |
| rs12524    | 6 | 122.808 | 0.9  | 0.83 | 0.95 | 0.001 | 0.79 | 0.53 | 1.14 | 0.223 | 0.287 |
| rs520046   | 6 | 122.809 | 0.82 | 0.71 | 0.91 | 0.003 | 0.77 | 0.52 | 1.25 | 0.245 | 0.369 |
| rs577744   | 6 | 122.811 | 0.68 | 0.47 | 0.85 | 0.01  | 1.07 | 0.63 | 2.41 | 0.841 | 1.28  |
| rs510283   | 6 | 122.814 | 0.84 | 0.73 | 0.92 | 0.002 | 0.76 | 0.51 | 1.18 | 0.189 | 0.334 |
| rs1267948  | 6 | 122.815 | 0.9  | 0.83 | 0.95 | 0.001 | 0.79 | 0.54 | 1.14 | 0.225 | 0.286 |
| rs573709   | 6 | 122.821 | 0.83 | 0.71 | 0.92 | 0.003 | 0.77 | 0.51 | 1.25 | 0.244 | 0.368 |
| rs474440   | 6 | 122.821 | 0.9  | 0.83 | 0.95 | 0.001 | 0.79 | 0.54 | 1.14 | 0.226 | 0.285 |
| rs4945703  | 6 | 122.823 | 0.9  | 0.83 | 0.95 | 0.001 | 0.79 | 0.54 | 1.14 | 0.226 | 0.285 |
| rs520867   | 6 | 122.828 | 0.83 | 0.71 | 0.92 | 0.003 | 0.77 | 0.51 | 1.25 | 0.246 | 0.367 |
| rs693669   | 6 | 122.829 | 0.83 | 0.71 | 0.92 | 0.003 | 0.77 | 0.51 | 1.25 | 0.246 | 0.367 |
| rs13437168 | 6 | 122.829 | 0.89 | 0.82 | 0.95 | 0.001 | 0.72 | 0.46 | 1.08 | 0.122 | 0.221 |
| rs562616   | 6 | 122.83  | 0.68 | 0.48 | 0.85 | 0.011 | 1.07 | 0.62 | 2.4  | 0.845 | 1.27  |
| rs17201852 | 6 | 122.834 | 0.82 | 0.67 | 0.93 | 0.014 | 1.05 | 0.43 | 1.66 | 0.894 | 1.31  |
| rs471620   | 6 | 122.836 | 0.83 | 0.71 | 0.92 | 0.003 | 0.77 | 0.51 | 1.25 | 0.247 | 0.367 |
| rs509596   | 6 | 122.841 | 0.9  | 0.84 | 0.95 | 0.001 | 0.8  | 0.54 | 1.15 | 0.231 | 0.281 |
| rs560717   | 6 | 122.846 | 0.68 | 0.48 | 0.86 | 0.011 | 1.07 | 0.63 | 2.39 | 0.845 | 1.27  |
| rs561470   | 6 | 122.846 | 0.9  | 0.84 | 0.95 | 0.001 | 0.8  | 0.54 | 1.15 | 0.233 | 0.28  |
| rs538457   | 6 | 122.848 | 0.83 | 0.71 | 0.92 | 0.003 | 0.77 | 0.51 | 1.25 | 0.249 | 0.366 |
| rs7767237  | 6 | 122.851 | 0.9  | 0.84 | 0.95 | 0.001 | 0.8  | 0.54 | 1.15 | 0.235 | 0.279 |
| rs7767114  | 6 | 122.851 | 0.9  | 0.84 | 0.95 | 0.001 | 0.8  | 0.54 | 1.15 | 0.235 | 0.279 |
| rs11751662 | 6 | 122.855 | 0.9  | 0.84 | 0.95 | 0.001 | 0.8  | 0.54 | 1.15 | 0.236 | 0.278 |
| rs155458   | 6 | 122.856 | 0.69 | 0.48 | 0.86 | 0.011 | 1.07 | 0.63 | 2.37 | 0.845 | 1.27  |
| rs155461   | 6 | 122.862 | 0.69 | 0.48 | 0.86 | 0.011 | 1.07 | 0.63 | 2.37 | 0.845 | 1.27  |



|            |   |         |      |      |      |       |      |      |      |       |       |
|------------|---|---------|------|------|------|-------|------|------|------|-------|-------|
| rs155467   | 6 | 122.875 | 0.69 | 0.49 | 0.86 | 0.011 | 1.07 | 0.63 | 2.35 | 0.845 | 1.27  |
| rs197691   | 6 | 122.876 | 0.69 | 0.49 | 0.86 | 0.011 | 1.07 | 0.63 | 2.35 | 0.845 | 1.27  |
| rs129830   | 6 | 122.877 | 0.9  | 0.85 | 0.95 | 0.001 | 0.8  | 0.54 | 1.15 | 0.243 | 0.277 |
| rs197692   | 6 | 122.878 | 0.69 | 0.49 | 0.86 | 0.011 | 1.07 | 0.63 | 2.35 | 0.845 | 1.27  |
| rs197676   | 6 | 122.895 | 0.69 | 0.49 | 0.87 | 0.011 | 1.08 | 0.63 | 2.35 | 0.827 | 1.31  |
| rs197678   | 6 | 122.897 | 0.91 | 0.85 | 0.95 | 0.001 | 0.8  | 0.54 | 1.15 | 0.254 | 0.274 |
| rs197679   | 6 | 122.911 | 0.7  | 0.5  | 0.87 | 0.012 | 1.07 | 0.63 | 2.24 | 0.843 | 1.28  |
| rs197680   | 6 | 122.912 | 0.7  | 0.5  | 0.87 | 0.012 | 1.07 | 0.64 | 2.23 | 0.842 | 1.28  |
| rs197681   | 6 | 122.915 | 0.7  | 0.5  | 0.87 | 0.012 | 1.07 | 0.64 | 2.23 | 0.841 | 1.28  |
| rs197682   | 6 | 122.915 | 0.7  | 0.5  | 0.87 | 0.012 | 1.07 | 0.64 | 2.23 | 0.837 | 1.29  |
| rs197683   | 6 | 122.915 | 0.84 | 0.72 | 0.92 | 0.003 | 0.92 | 0.54 | 1.52 | 0.741 | 0.644 |
| rs197684   | 6 | 122.917 | 0.7  | 0.5  | 0.87 | 0.011 | 1.08 | 0.65 | 2.25 | 0.81  | 1.35  |
| rs197685   | 6 | 122.917 | 0.7  | 0.5  | 0.87 | 0.011 | 1.09 | 0.65 | 2.25 | 0.806 | 1.36  |
| rs197686   | 6 | 122.92  | 0.84 | 0.73 | 0.92 | 0.002 | 1.01 | 0.61 | 1.66 | 0.968 | 1.07  |
| rs197687   | 6 | 122.921 | 0.84 | 0.73 | 0.92 | 0.002 | 1.01 | 0.61 | 1.67 | 0.963 | 1.08  |
| rs9388097  | 6 | 122.927 | 0.84 | 0.73 | 0.92 | 0.002 | 1.01 | 0.61 | 1.67 | 0.958 | 1.09  |
| rs9375150  | 6 | 122.929 | 0.92 | 0.86 | 0.96 | 0.001 | 0.82 | 0.54 | 1.19 | 0.305 | 0.276 |
| rs11154087 | 6 | 122.938 | 0.7  | 0.51 | 0.87 | 0.009 | 1.11 | 0.66 | 2.31 | 0.744 | 1.52  |
| rs11968579 | 6 | 122.939 | 2.02 | 0.56 | 16.7 | 0.424 | 0.77 | 0    | 2.01 | 0.889 | 1.41  |
| rs12212981 | 6 | 122.944 | 1.43 | 1.15 | 1.96 | 0.009 | 1.05 | 0.56 | 1.5  | 0.865 | 0.907 |
| rs1430816  | 6 | 122.955 | 1.63 | 1.28 | 2.41 | 0.002 | 1.03 | 0.47 | 1.53 | 0.935 | 0.962 |
| rs9482260  | 6 | 122.97  | 1.63 | 1.27 | 2.47 | 0.003 | 1.11 | 0.53 | 1.64 | 0.718 | 0.863 |
| rs9490495  | 6 | 122.976 | 1.62 | 1.27 | 2.47 | 0.003 | 1.12 | 0.54 | 1.66 | 0.697 | 0.854 |
| rs9490497  | 6 | 122.979 | 1.6  | 1.25 | 2.39 | 0.004 | 1.14 | 0.6  | 1.7  | 0.63  | 0.826 |

Table S11. Single-locus analyses for eQTL SNPs of *PTCH1*. (Ch: chromosome; ME: mediation effect; AE: alternative effect; CI: confidence interval).

| SNP        | Ch | Location (Mb) | ME   | 95% CI |      | P-value | AE   | 95% CI |      | P-value | Proportion of Mediation |
|------------|----|---------------|------|--------|------|---------|------|--------|------|---------|-------------------------|
| rs16909856 | 9  | 97.244        | 1.01 | 1.01   | 1.01 | <0.001  | 0.91 | 0.41   | 1.78 | 0.79    | -0.103                  |
| rs16909859 | 9  | 97.245        | 1.02 | 1.01   | 1.02 | <0.001  | 0.91 | 0.41   | 1.77 | 0.787   | -0.171                  |
| rs16909865 | 9  | 97.247        | 1    | 0.99   | 1    | <0.001  | 0.86 | 0.38   | 1.73 | 0.699   | 0.022                   |
| rs2282043  | 9  | 97.252        | 1.03 | 1.01   | 1.04 | <0.001  | 1.08 | 0.51   | 2.23 | 0.827   | 0.259                   |
| rs16909898 | 9  | 97.271        | 1.07 | 1.04   | 1.12 | <0.001  | 1.1  | 0.55   | 2.2  | 0.779   | 0.447                   |
| rs16909902 | 9  | 97.276        | 1.08 | 1.04   | 1.13 | <0.001  | 1.09 | 0.55   | 2.14 | 0.787   | 0.484                   |
| rs3824488  | 9  | 97.276        | 1.06 | 1.03   | 1.1  | <0.001  | 1.07 | 0.53   | 2.13 | 0.848   | 0.481                   |
| rs2282041  | 9  | 97.288        | 1.11 | 1.06   | 1.19 | <0.001  | 1.04 | 0.56   | 1.96 | 0.91    | 0.769                   |
| rs10512249 | 9  | 97.296        | 1.12 | 1.06   | 1.2  | <0.001  | 1.05 | 0.59   | 1.9  | 0.873   | 0.729                   |
| rs10512247 | 9  | 97.336        | 1.09 | 1.05   | 1.15 | <0.001  | 1    | 0.53   | 1.78 | 0.989   | 1.05                    |
| rs16909975 | 9  | 97.347        | 1.08 | 1.04   | 1.13 | <0.001  | 0.99 | 0.53   | 1.8  | 0.985   | 1.08                    |
| rs16909978 | 9  | 97.348        | 1.09 | 1.04   | 1.14 | <0.001  | 0.97 | 0.49   | 1.78 | 0.914   | 1.74                    |
| rs16909981 | 9  | 97.353        | 1.1  | 1.05   | 1.15 | <0.001  | 0.98 | 0.52   | 1.76 | 0.957   | 1.22                    |

Table S12. Single-locus analyses for eQTL SNPs of the probe 223259\_at at *ORMDL3*. (Ch: chromosome; ME: mediation effect; AE: alternative effect; CI: confidence interval).

| SNP        | Ch | Location (Mb) | ME    | 95% CI |      | P-value | AE    | 95% CI |       | p-value | Proportion of Mediation |
|------------|----|---------------|-------|--------|------|---------|-------|--------|-------|---------|-------------------------|
| rs1007654  | 17 | 35.365        | 1.05  | 0.992  | 1.12 | 0.152   | 0.737 | 0.483  | 1.06  | 0.129   | -0.158                  |
| rs1007655  | 17 | 35.365        | 1.05  | 0.991  | 1.13 | 0.155   | 0.738 | 0.481  | 1.07  | 0.134   | -0.162                  |
| rs1008723  | 17 | 35.320        | 1.2   | 1.03   | 1.45 | 0.0448  | 0.536 | 0.316  | 0.795 | 0.00876 | -0.296                  |
| rs10445306 | 17 | 34.845        | 1.06  | 0.973  | 1.17 | 0.208   | 0.805 | 0.521  | 1.14  | 0.272   | -0.335                  |
| rs10445308 | 17 | 35.192        | 1.15  | 1.03   | 1.32 | 0.0319  | 0.472 | 0.277  | 0.714 | 0.00172 | -0.154                  |
| rs10491128 | 17 | 34.806        | 1.06  | 0.973  | 1.17 | 0.195   | 0.8   | 0.512  | 1.14  | 0.259   | -0.338                  |
| rs10491129 | 17 | 34.715        | 1.07  | 0.977  | 1.18 | 0.181   | 0.772 | 0.494  | 1.1   | 0.183   | -0.286                  |
| rs1053651  | 17 | 35.076        | 1.06  | 0.965  | 1.18 | 0.227   | 0.797 | 0.513  | 1.16  | 0.278   | -0.323                  |
| rs1054609  | 17 | 35.287        | 1.15  | 1.01   | 1.35 | 0.0621  | 0.532 | 0.319  | 0.791 | 0.00739 | -0.2                    |
| rs1058808  | 17 | 35.138        | 1.05  | 0.944  | 1.15 | 0.353   | 0.644 | 0.373  | 0.98  | 0.079   | -0.0926                 |
| rs11078893 | 17 | 34.650        | 1.08  | 0.974  | 1.21 | 0.172   | 0.747 | 0.454  | 1.07  | 0.163   | -0.293                  |
| rs11078894 | 17 | 34.650        | 1     | 0.991  | 1.02 | 0.699   | 0.614 | 0.298  | 0.975 | 0.106   | -0.00408                |
| rs11078895 | 17 | 34.655        | 1     | 0.99   | 1.02 | 0.654   | 0.63  | 0.319  | 0.986 | 0.103   | -0.00574                |
| rs11078897 | 17 | 34.669        | 1.07  | 0.977  | 1.18 | 0.18    | 0.75  | 0.481  | 1.05  | 0.133   | -0.246                  |
| rs11078898 | 17 | 34.790        | 1.06  | 0.974  | 1.17 | 0.193   | 0.798 | 0.511  | 1.13  | 0.253   | -0.335                  |
| rs11078901 | 17 | 34.879        | 1.06  | 0.972  | 1.17 | 0.205   | 0.805 | 0.519  | 1.14  | 0.274   | -0.346                  |
| rs11078902 | 17 | 34.885        | 1.08  | 0.97   | 1.23 | 0.166   | 0.804 | 0.492  | 1.18  | 0.302   | -0.532                  |
| rs11078903 | 17 | 34.885        | 1.08  | 0.971  | 1.23 | 0.166   | 0.804 | 0.492  | 1.18  | 0.302   | -0.534                  |
| rs11078907 | 17 | 34.916        | 1.07  | 0.974  | 1.18 | 0.193   | 0.803 | 0.515  | 1.15  | 0.27    | -0.369                  |
| rs11078912 | 17 | 34.925        | 1.07  | 0.977  | 1.19 | 0.178   | 0.802 | 0.516  | 1.15  | 0.264   | -0.397                  |
| rs11078913 | 17 | 34.925        | 1.07  | 0.977  | 1.19 | 0.174   | 0.803 | 0.516  | 1.15  | 0.265   | -0.409                  |
| rs11078915 | 17 | 34.969        | 1.07  | 0.975  | 1.2  | 0.169   | 0.806 | 0.527  | 1.19  | 0.291   | -0.451                  |
| rs11078919 | 17 | 35.089        | 1.06  | 0.945  | 1.18 | 0.304   | 0.725 | 0.443  | 1.07  | 0.162   | -0.185                  |
| rs11078925 | 17 | 35.279        | 1.15  | 1.01   | 1.35 | 0.0585  | 0.521 | 0.307  | 0.785 | 0.00651 | -0.192                  |
| rs11078927 | 17 | 35.318        | 1.14  | 1.01   | 1.34 | 0.0759  | 0.578 | 0.343  | 0.852 | 0.0199  | -0.233                  |
| rs11078930 | 17 | 35.395        | 0.998 | 0.995  | 1    | 0.119   | 0.814 | 0.538  | 1.19  | 0.324   | 0.00836                 |
| rs11557466 | 17 | 35.278        | 1.15  | 1.01   | 1.35 | 0.0584  | 0.521 | 0.306  | 0.785 | 0.00646 | -0.191                  |
| rs11654018 | 17 | 34.957        | 1.08  | 0.975  | 1.2  | 0.167   | 0.804 | 0.522  | 1.16  | 0.276   | -0.446                  |
| rs11654954 | 17 | 35.000        | 1.01  | 0.977  | 1.04 | 0.554   | 0.75  | 0.427  | 1.18  | 0.263   | -0.0287                 |
| rs11655972 | 17 | 34.661        | 1     | 0.989  | 1.02 | 0.626   | 0.643 | 0.337  | 0.992 | 0.104   | -0.00705                |
| rs11657058 | 17 | 34.953        | 1.01  | 0.977  | 1.04 | 0.643   | 0.696 | 0.376  | 1.09  | 0.201   | -0.0158                 |
| rs11657153 | 17 | 34.953        | 1.01  | 0.977  | 1.04 | 0.642   | 0.695 | 0.372  | 1.1   | 0.201   | -0.016                  |
| rs11658678 | 17 | 34.934        | 1.07  | 0.977  | 1.19 | 0.173   | 0.803 | 0.516  | 1.15  | 0.265   | -0.413                  |
| rs11869286 | 17 | 35.067        | 1.05  | 0.961  | 1.14 | 0.28    | 0.891 | 0.596  | 1.29  | 0.548   | -0.644                  |
| rs11870631 | 17 | 34.899        | 1.06  | 0.973  | 1.18 | 0.198   | 0.804 | 0.515  | 1.15  | 0.272   | -0.36                   |
| rs11870965 | 17 | 35.284        | 1.15  | 1.01   | 1.35 | 0.0618  | 0.531 | 0.318  | 0.79  | 0.0073  | -0.2                    |
| rs12150079 | 17 | 35.279        | 1.22  | 1.05   | 1.51 | 0.0358  | 0.545 | 0.346  | 0.847 | 0.00824 | -0.367                  |
| rs12150298 | 17 | 35.088        | 1.06  | 0.945  | 1.18 | 0.305   | 0.729 | 0.447  | 1.08  | 0.166   | -0.187                  |

|            |    |        |       |       |      |        |       |       |       |         |          |
|------------|----|--------|-------|-------|------|--------|-------|-------|-------|---------|----------|
| rs12232497 | 17 | 35.294 | 1.15  | 1.01  | 1.35 | 0.0626 | 0.534 | 0.321 | 0.793 | 0.00757 | -0.202   |
| rs12449852 | 17 | 34.886 | 1.01  | 0.977 | 1.04 | 0.695  | 0.666 | 0.315 | 1.09  | 0.196   | -0.0113  |
| rs12450559 | 17 | 34.948 | 1.07  | 0.978 | 1.19 | 0.168  | 0.804 | 0.524 | 1.15  | 0.261   | -0.431   |
| rs12452880 | 17 | 34.845 | 1.06  | 0.973 | 1.17 | 0.205  | 0.804 | 0.52  | 1.14  | 0.269   | -0.336   |
| rs12453198 | 17 | 34.995 | 1.01  | 0.976 | 1.04 | 0.562  | 0.744 | 0.422 | 1.18  | 0.255   | -0.0276  |
| rs12453682 | 17 | 35.024 | 1.05  | 0.98  | 1.13 | 0.224  | 0.848 | 0.57  | 1.23  | 0.4     | -0.355   |
| rs12600751 | 17 | 34.807 | 1.06  | 0.973 | 1.17 | 0.196  | 0.801 | 0.513 | 1.14  | 0.26    | -0.338   |
| rs12603332 | 17 | 35.336 | 1.14  | 1.01  | 1.33 | 0.0677 | 0.548 | 0.337 | 0.801 | 0.00882 | -0.202   |
| rs12936231 | 17 | 35.283 | 1.2   | 1.03  | 1.45 | 0.0433 | 0.492 | 0.295 | 0.735 | 0.00244 | -0.239   |
| rs12936996 | 17 | 34.919 | 1.07  | 0.975 | 1.18 | 0.189  | 0.803 | 0.515 | 1.15  | 0.269   | -0.376   |
| rs12937013 | 17 | 34.919 | 1     | 0.984 | 1.03 | 0.667  | 0.704 | 0.375 | 1.08  | 0.208   | -0.0114  |
| rs12938099 | 17 | 34.866 | 1     | 0.987 | 1.02 | 0.686  | 0.713 | 0.389 | 1.1   | 0.21    | -0.00874 |
| rs12947506 | 17 | 34.961 | 1.01  | 0.977 | 1.04 | 0.636  | 0.696 | 0.378 | 1.11  | 0.202   | -0.0171  |
| rs12950186 | 17 | 34.647 | 1     | 0.991 | 1.02 | 0.726  | 0.606 | 0.282 | 0.968 | 0.108   | -0.00321 |
| rs12950743 | 17 | 35.303 | 1.2   | 1.02  | 1.45 | 0.0448 | 0.5   | 0.303 | 0.745 | 0.00274 | -0.246   |
| rs13695    | 17 | 35.799 | 0.976 | 0.849 | 1.12 | 0.731  | 1.06  | 0.683 | 1.84  | 0.806   | -0.696   |
| rs1476278  | 17 | 35.090 | 1.06  | 0.945 | 1.18 | 0.304  | 0.724 | 0.442 | 1.07  | 0.162   | -0.184   |
| rs1565922  | 17 | 35.085 | 1.05  | 0.952 | 1.17 | 0.302  | 0.758 | 0.479 | 1.1   | 0.199   | -0.205   |
| rs1565923  | 17 | 35.112 | 1.04  | 0.949 | 1.14 | 0.366  | 0.67  | 0.386 | 1.02  | 0.103   | -0.0942  |
| rs1619021  | 17 | 34.993 | 1.07  | 0.973 | 1.18 | 0.186  | 0.817 | 0.539 | 1.21  | 0.329   | -0.418   |
| rs17609240 | 17 | 35.364 | 1.06  | 0.993 | 1.15 | 0.136  | 0.7   | 0.458 | 1.02  | 0.0848  | -0.155   |
| rs1810132  | 17 | 35.120 | 1.04  | 0.948 | 1.14 | 0.367  | 0.661 | 0.376 | 1.01  | 0.0983  | -0.0912  |
| rs1874226  | 17 | 34.983 | 1.01  | 0.976 | 1.05 | 0.59   | 0.721 | 0.397 | 1.15  | 0.228   | -0.0235  |
| rs1874228  | 17 | 35.029 | 1.07  | 0.972 | 1.19 | 0.179  | 0.894 | 0.579 | 1.33  | 0.598   | -1.37    |
| rs1877030  | 17 | 34.994 | 1.01  | 0.976 | 1.04 | 0.568  | 0.738 | 0.415 | 1.18  | 0.248   | -0.0266  |
| rs1877031  | 17 | 35.068 | 1.05  | 0.961 | 1.14 | 0.281  | 0.89  | 0.594 | 1.28  | 0.543   | -0.628   |
| rs2018026  | 17 | 34.913 | 1.07  | 0.974 | 1.18 | 0.195  | 0.804 | 0.516 | 1.15  | 0.271   | -0.364   |
| rs2061342  | 17 | 34.659 | 1.07  | 0.977 | 1.18 | 0.18   | 0.742 | 0.479 | 1.04  | 0.115   | -0.23    |
| rs2168785  | 17 | 34.661 | 1.07  | 0.977 | 1.18 | 0.18   | 0.744 | 0.479 | 1.04  | 0.119   | -0.234   |
| rs2271308  | 17 | 35.071 | 1.06  | 0.965 | 1.18 | 0.228  | 0.802 | 0.518 | 1.16  | 0.288   | -0.331   |
| rs2271309  | 17 | 35.039 | 1.02  | 0.962 | 1.07 | 0.528  | 0.82  | 0.5   | 1.28  | 0.417   | -0.0782  |
| rs2290400  | 17 | 35.320 | 1.19  | 1.03  | 1.43 | 0.0485 | 0.537 | 0.315 | 0.793 | 0.00832 | -0.28    |
| rs2302073  | 17 | 34.711 | 1     | 0.988 | 1.03 | 0.607  | 0.674 | 0.354 | 1.04  | 0.154   | -0.00987 |
| rs2303316  | 17 | 34.958 | 1.08  | 0.975 | 1.2  | 0.167  | 0.804 | 0.522 | 1.17  | 0.277   | -0.447   |
| rs2305479  | 17 | 35.316 | 1.19  | 1.02  | 1.44 | 0.0533 | 0.528 | 0.309 | 0.78  | 0.00734 | -0.263   |
| rs2305480  | 17 | 35.316 | 1.14  | 1.01  | 1.33 | 0.0769 | 0.574 | 0.341 | 0.852 | 0.0179  | -0.225   |
| rs2313171  | 17 | 35.087 | 1.06  | 0.945 | 1.18 | 0.306  | 0.731 | 0.45  | 1.08  | 0.168   | -0.188   |
| rs2313640  | 17 | 35.365 | 1.05  | 0.992 | 1.12 | 0.154  | 0.743 | 0.487 | 1.07  | 0.141   | -0.163   |
| rs2338755  | 17 | 34.673 | 1.07  | 0.977 | 1.18 | 0.179  | 0.751 | 0.482 | 1.06  | 0.135   | -0.247   |
| rs2338799  | 17 | 34.767 | 1.01  | 0.988 | 1.03 | 0.591  | 0.7   | 0.372 | 1.08  | 0.2     | -0.0128  |
| rs2338800  | 17 | 34.752 | 1.06  | 0.977 | 1.18 | 0.182  | 0.786 | 0.507 | 1.11  | 0.218   | -0.312   |
| rs2517954  | 17 | 35.097 | 1.04  | 0.95  | 1.14 | 0.351  | 0.687 | 0.409 | 1.04  | 0.118   | -0.107   |
| rs2517955  | 17 | 35.097 | 1.05  | 0.95  | 1.16 | 0.308  | 0.663 | 0.397 | 1     | 0.0906  | -0.118   |

|           |    |        |       |       |      |        |       |       |       |         |          |
|-----------|----|--------|-------|-------|------|--------|-------|-------|-------|---------|----------|
| rs2517956 | 17 | 35.097 | 1.04  | 0.95  | 1.14 | 0.352  | 0.685 | 0.408 | 1.04  | 0.117   | -0.107   |
| rs2517957 | 17 | 35.092 | 1.06  | 0.945 | 1.18 | 0.303  | 0.721 | 0.438 | 1.07  | 0.159   | -0.182   |
| rs2517958 | 17 | 35.092 | 1.06  | 0.945 | 1.18 | 0.303  | 0.719 | 0.435 | 1.07  | 0.157   | -0.181   |
| rs2872507 | 17 | 35.294 | 1.15  | 1.01  | 1.35 | 0.0628 | 0.534 | 0.322 | 0.794 | 0.00763 | -0.203   |
| rs2879258 | 17 | 34.653 | 1     | 0.991 | 1.02 | 0.691  | 0.617 | 0.305 | 0.977 | 0.105   | -0.00436 |
| rs2934952 | 17 | 35.086 | 1.05  | 0.952 | 1.17 | 0.302  | 0.754 | 0.474 | 1.09  | 0.195   | -0.202   |
| rs2934953 | 17 | 35.086 | 1.05  | 0.952 | 1.17 | 0.302  | 0.755 | 0.475 | 1.09  | 0.196   | -0.203   |
| rs2941504 | 17 | 35.084 | 1.05  | 0.952 | 1.17 | 0.302  | 0.758 | 0.479 | 1.1   | 0.199   | -0.205   |
| rs2941505 | 17 | 35.086 | 1.06  | 0.946 | 1.18 | 0.307  | 0.739 | 0.458 | 1.08  | 0.176   | -0.193   |
| rs2941506 | 17 | 35.087 | 1.06  | 0.946 | 1.18 | 0.307  | 0.737 | 0.455 | 1.08  | 0.174   | -0.192   |
| rs2952151 | 17 | 35.082 | 1.05  | 0.953 | 1.17 | 0.3    | 0.767 | 0.484 | 1.12  | 0.219   | -0.22    |
| rs2952155 | 17 | 35.115 | 1.01  | 0.954 | 1.05 | 0.723  | 0.711 | 0.388 | 1.14  | 0.196   | -0.0206  |
| rs2952156 | 17 | 35.130 | 1.04  | 0.948 | 1.14 | 0.367  | 0.66  | 0.375 | 1.01  | 0.0976  | -0.0907  |
| rs3744348 | 17 | 34.671 | 1.07  | 0.977 | 1.18 | 0.179  | 0.751 | 0.481 | 1.06  | 0.134   | -0.247   |
| rs3744349 | 17 | 34.668 | 1     | 0.989 | 1.02 | 0.622  | 0.649 | 0.337 | 0.999 | 0.114   | -0.00754 |
| rs3816470 | 17 | 35.239 | 1.2   | 1.03  | 1.44 | 0.038  | 0.471 | 0.282 | 0.703 | 0.00154 | -0.212   |
| rs3894194 | 17 | 35.376 | 1.06  | 0.974 | 1.17 | 0.201  | 0.671 | 0.43  | 0.94  | 0.0405  | -0.142   |
| rs3902025 | 17 | 35.373 | 1.05  | 0.987 | 1.13 | 0.154  | 0.639 | 0.414 | 0.9   | 0.0236  | -0.0966  |
| rs3964723 | 17 | 34.658 | 1.07  | 0.975 | 1.18 | 0.179  | 0.742 | 0.475 | 1.04  | 0.122   | -0.239   |
| rs4065985 | 17 | 35.355 | 1.09  | 1.01  | 1.21 | 0.0457 | 0.504 | 0.3   | 0.749 | 0.00288 | -0.104   |
| rs4239222 | 17 | 34.950 | 1.07  | 0.977 | 1.2  | 0.167  | 0.804 | 0.523 | 1.16  | 0.266   | -0.437   |
| rs4378650 | 17 | 35.334 | 1.14  | 1.01  | 1.32 | 0.0692 | 0.55  | 0.336 | 0.812 | 0.00977 | -0.198   |
| rs4390625 | 17 | 34.874 | 1.06  | 0.971 | 1.17 | 0.211  | 0.806 | 0.521 | 1.14  | 0.275   | -0.337   |
| rs4488484 | 17 | 34.971 | 1.01  | 0.975 | 1.04 | 0.615  | 0.705 | 0.382 | 1.13  | 0.21    | -0.0201  |
| rs4533315 | 17 | 34.865 | 1.02  | 0.976 | 1.09 | 0.364  | 0.996 | 0.696 | 1.41  | 0.984   | 1.17     |
| rs4794820 | 17 | 35.343 | 1.1   | 0.996 | 1.24 | 0.103  | 0.616 | 0.374 | 0.916 | 0.0365  | -0.184   |
| rs4795355 | 17 | 34.681 | 1.07  | 0.977 | 1.18 | 0.18   | 0.753 | 0.483 | 1.06  | 0.14    | -0.252   |
| rs4795357 | 17 | 34.823 | 1.06  | 0.973 | 1.17 | 0.203  | 0.803 | 0.519 | 1.14  | 0.266   | -0.336   |
| rs4795358 | 17 | 34.827 | 1     | 0.987 | 1.02 | 0.644  | 0.713 | 0.388 | 1.1   | 0.212   | -0.0109  |
| rs4795369 | 17 | 34.863 | 1.05  | 0.975 | 1.15 | 0.218  | 0.758 | 0.494 | 1.09  | 0.16    | -0.205   |
| rs4795384 | 17 | 34.970 | 1.07  | 0.974 | 1.2  | 0.171  | 0.807 | 0.53  | 1.18  | 0.299   | -0.449   |
| rs4795385 | 17 | 34.987 | 1.01  | 0.968 | 1.05 | 0.623  | 0.731 | 0.421 | 1.17  | 0.218   | -0.0273  |
| rs4795397 | 17 | 35.277 | 1.15  | 1.01  | 1.35 | 0.0583 | 0.521 | 0.306 | 0.785 | 0.00643 | -0.191   |
| rs4795400 | 17 | 35.321 | 1.15  | 1.01  | 1.35 | 0.0724 | 0.581 | 0.341 | 0.867 | 0.0226  | -0.257   |
| rs4795402 | 17 | 35.339 | 0.979 | 0.852 | 1.09 | 0.741  | 1.23  | 0.726 | 1.85  | 0.378   | -0.125   |
| rs4795405 | 17 | 35.342 | 1.1   | 1     | 1.25 | 0.086  | 0.602 | 0.37  | 0.896 | 0.0252  | -0.185   |
| rs4795408 | 17 | 35.361 | 1.08  | 0.973 | 1.2  | 0.169  | 0.647 | 0.416 | 0.897 | 0.0261  | -0.163   |
| rs584377  | 17 | 34.714 | 1     | 0.988 | 1.03 | 0.605  | 0.676 | 0.355 | 1.04  | 0.158   | -0.0101  |
| rs588193  | 17 | 34.694 | 1.07  | 0.976 | 1.18 | 0.18   | 0.759 | 0.487 | 1.07  | 0.152   | -0.261   |
| rs590051  | 17 | 34.700 | 1     | 0.988 | 1.03 | 0.611  | 0.668 | 0.349 | 1.03  | 0.145   | -0.0093  |
| rs600010  | 17 | 34.687 | 1.07  | 0.976 | 1.18 | 0.18   | 0.755 | 0.484 | 1.06  | 0.143   | -0.254   |
| rs602688  | 17 | 34.693 | 1.07  | 0.976 | 1.18 | 0.179  | 0.757 | 0.487 | 1.07  | 0.149   | -0.26    |
| rs620686  | 17 | 34.707 | 1.07  | 0.977 | 1.18 | 0.18   | 0.766 | 0.491 | 1.08  | 0.169   | -0.275   |

|           |    |        |      |       |      |        |       |       |       |         |          |
|-----------|----|--------|------|-------|------|--------|-------|-------|-------|---------|----------|
| rs632202  | 17 | 34.707 | 1.07 | 0.977 | 1.18 | 0.18   | 0.767 | 0.492 | 1.08  | 0.171   | -0.276   |
| rs649180  | 17 | 34.718 | 1    | 0.988 | 1.03 | 0.602  | 0.681 | 0.358 | 1.05  | 0.166   | -0.0106  |
| rs6503503 | 17 | 34.768 | 1.06 | 0.976 | 1.17 | 0.185  | 0.792 | 0.509 | 1.13  | 0.236   | -0.325   |
| rs6503504 | 17 | 34.768 | 1.01 | 0.987 | 1.03 | 0.595  | 0.703 | 0.375 | 1.09  | 0.204   | -0.0128  |
| rs6503507 | 17 | 34.779 | 1.06 | 0.974 | 1.17 | 0.19   | 0.796 | 0.51  | 1.13  | 0.248   | -0.332   |
| rs6503513 | 17 | 34.815 | 1    | 0.982 | 1.02 | 0.739  | 0.724 | 0.403 | 1.11  | 0.206   | -0.00919 |
| rs6503521 | 17 | 34.969 | 1.01 | 0.976 | 1.04 | 0.626  | 0.7   | 0.377 | 1.11  | 0.205   | -0.0187  |
| rs6503525 | 17 | 35.349 | 1.08 | 0.974 | 1.21 | 0.158  | 0.632 | 0.399 | 0.881 | 0.0209  | -0.159   |
| rs6503526 | 17 | 35.368 | 1.07 | 0.972 | 1.2  | 0.173  | 0.644 | 0.416 | 0.896 | 0.0232  | -0.155   |
| rs6503527 | 17 | 35.368 | 1.05 | 0.991 | 1.12 | 0.159  | 0.762 | 0.504 | 1.11  | 0.183   | -0.179   |
| rs667239  | 17 | 34.696 | 1    | 0.988 | 1.03 | 0.611  | 0.666 | 0.348 | 1.03  | 0.142   | -0.00915 |
| rs676882  | 17 | 34.687 | 1    | 0.987 | 1.03 | 0.657  | 0.664 | 0.315 | 1.06  | 0.182   | -0.00837 |
| rs7207600 | 17 | 35.345 | 1.06 | 0.992 | 1.14 | 0.144  | 0.718 | 0.458 | 1.05  | 0.112   | -0.164   |
| rs7208487 | 17 | 34.797 | 1.01 | 0.987 | 1.03 | 0.607  | 0.712 | 0.388 | 1.1   | 0.215   | -0.0132  |
| rs7212938 | 17 | 35.376 | 1.05 | 0.977 | 1.14 | 0.217  | 0.655 | 0.42  | 0.943 | 0.0373  | -0.109   |
| rs7214151 | 17 | 34.761 | 1.02 | 0.978 | 1.07 | 0.37   | 1.03  | 0.739 | 1.47  | 0.862   | 0.409    |
| rs7216086 | 17 | 34.963 | 1.08 | 0.975 | 1.2  | 0.169  | 0.805 | 0.522 | 1.18  | 0.286   | -0.45    |
| rs7216389 | 17 | 35.323 | 1.21 | 1.03  | 1.47 | 0.041  | 0.538 | 0.315 | 0.796 | 0.0095  | -0.317   |
| rs7218321 | 17 | 35.368 | 1.05 | 0.992 | 1.12 | 0.157  | 0.751 | 0.494 | 1.09  | 0.159   | -0.17    |
| rs7218742 | 17 | 35.368 | 1.05 | 0.992 | 1.12 | 0.155  | 0.746 | 0.49  | 1.08  | 0.148   | -0.166   |
| rs7219080 | 17 | 35.368 | 1.05 | 0.992 | 1.12 | 0.157  | 0.752 | 0.495 | 1.09  | 0.162   | -0.171   |
| rs7219923 | 17 | 35.328 | 1.21 | 1.03  | 1.47 | 0.0416 | 0.54  | 0.314 | 0.802 | 0.01    | -0.32    |
| rs7220650 | 17 | 34.741 | 1.07 | 0.977 | 1.18 | 0.182  | 0.781 | 0.503 | 1.11  | 0.207   | -0.304   |
| rs7221875 | 17 | 34.797 | 1.06 | 0.974 | 1.17 | 0.192  | 0.799 | 0.511 | 1.14  | 0.256   | -0.337   |
| rs7223438 | 17 | 34.775 | 1.06 | 0.974 | 1.17 | 0.188  | 0.795 | 0.51  | 1.13  | 0.244   | -0.33    |
| rs7224129 | 17 | 35.329 | 1.21 | 1.02  | 1.47 | 0.042  | 0.541 | 0.314 | 0.809 | 0.0104  | -0.321   |
| rs7225096 | 17 | 34.918 | 1.07 | 0.974 | 1.18 | 0.191  | 0.803 | 0.515 | 1.15  | 0.27    | -0.372   |
| rs7359623 | 17 | 35.303 | 1.2  | 1.03  | 1.46 | 0.042  | 0.488 | 0.295 | 0.725 | 0.00192 | -0.239   |
| rs7501488 | 17 | 34.830 | 1.06 | 0.973 | 1.17 | 0.204  | 0.803 | 0.52  | 1.14  | 0.268   | -0.336   |
| rs7503069 | 17 | 34.951 | 1.07 | 0.976 | 1.2  | 0.167  | 0.804 | 0.521 | 1.16  | 0.272   | -0.444   |
| rs7503195 | 17 | 34.976 | 1.03 | 0.971 | 1.11 | 0.338  | 0.913 | 0.622 | 1.34  | 0.635   | -0.505   |
| rs7503377 | 17 | 34.962 | 1.01 | 0.976 | 1.04 | 0.636  | 0.696 | 0.378 | 1.11  | 0.202   | -0.0171  |
| rs7503705 | 17 | 34.923 | 1.07 | 0.976 | 1.19 | 0.179  | 0.802 | 0.515 | 1.15  | 0.264   | -0.395   |
| rs752314  | 17 | 34.664 | 1.07 | 0.977 | 1.18 | 0.18   | 0.748 | 0.481 | 1.05  | 0.128   | -0.241   |
| rs755500  | 17 | 34.663 | 1.07 | 0.977 | 1.18 | 0.18   | 0.746 | 0.48  | 1.05  | 0.125   | -0.238   |
| rs801418  | 17 | 34.712 | 1    | 0.988 | 1.03 | 0.606  | 0.675 | 0.354 | 1.04  | 0.156   | -0.00996 |
| rs801426  | 17 | 34.695 | 1.07 | 0.977 | 1.18 | 0.18   | 0.761 | 0.488 | 1.07  | 0.157   | -0.266   |
| rs8065126 | 17 | 35.353 | 1.05 | 0.992 | 1.13 | 0.148  | 0.725 | 0.472 | 1.05  | 0.117   | -0.159   |
| rs8065963 | 17 | 34.935 | 1.07 | 0.978 | 1.19 | 0.172  | 0.803 | 0.516 | 1.15  | 0.262   | -0.414   |
| rs8066704 | 17 | 34.731 | 1.07 | 0.977 | 1.18 | 0.181  | 0.777 | 0.498 | 1.1   | 0.195   | -0.295   |
| rs8067378 | 17 | 35.305 | 1.2  | 1.02  | 1.45 | 0.0453 | 0.502 | 0.304 | 0.748 | 0.00286 | -0.248   |
| rs8069074 | 17 | 34.939 | 1.01 | 0.981 | 1.04 | 0.65   | 0.699 | 0.368 | 1.08  | 0.203   | -0.014   |
| rs8069176 | 17 | 35.311 | 1.14 | 1.01  | 1.35 | 0.069  | 0.554 | 0.327 | 0.822 | 0.0128  | -0.219   |

|           |    |        |      |       |      |        |       |       |       |          |          |
|-----------|----|--------|------|-------|------|--------|-------|-------|-------|----------|----------|
| rs8069451 | 17 | 34.758 | 1.07 | 0.977 | 1.18 | 0.181  | 0.792 | 0.509 | 1.13  | 0.239    | -0.336   |
| rs8070695 | 17 | 34.732 | 1.07 | 0.977 | 1.18 | 0.181  | 0.778 | 0.499 | 1.11  | 0.198    | -0.297   |
| rs8073907 | 17 | 34.678 | 1    | 0.989 | 1.02 | 0.62   | 0.654 | 0.339 | 1     | 0.121    | -0.00789 |
| rs8076131 | 17 | 35.334 | 1.13 | 1.01  | 1.3  | 0.0794 | 0.597 | 0.356 | 0.902 | 0.028    | -0.231   |
| rs8076462 | 17 | 34.654 | 1.07 | 0.974 | 1.2  | 0.176  | 0.744 | 0.468 | 1.05  | 0.141    | -0.262   |
| rs8076474 | 17 | 35.365 | 1.05 | 0.991 | 1.13 | 0.153  | 0.734 | 0.477 | 1.06  | 0.127    | -0.159   |
| rs8076494 | 17 | 34.770 | 1.06 | 0.976 | 1.17 | 0.186  | 0.793 | 0.51  | 1.13  | 0.239    | -0.326   |
| rs8076546 | 17 | 34.809 | 1.06 | 0.973 | 1.17 | 0.197  | 0.801 | 0.514 | 1.14  | 0.262    | -0.338   |
| rs8078228 | 17 | 35.089 | 1.06 | 0.945 | 1.18 | 0.304  | 0.726 | 0.443 | 1.07  | 0.163    | -0.185   |
| rs8079416 | 17 | 35.346 | 1.08 | 0.975 | 1.21 | 0.159  | 0.636 | 0.4   | 0.884 | 0.0214   | -0.16    |
| rs8182252 | 17 | 34.981 | 1.01 | 0.975 | 1.04 | 0.602  | 0.734 | 0.43  | 1.14  | 0.229    | -0.0244  |
| rs869402  | 17 | 35.322 | 1.21 | 1.03  | 1.47 | 0.0414 | 0.538 | 0.315 | 0.795 | 0.00937  | -0.314   |
| rs879606  | 17 | 35.035 | 1.02 | 0.967 | 1.07 | 0.468  | 0.855 | 0.497 | 1.33  | 0.547    | -0.119   |
| rs881844  | 17 | 35.064 | 1.05 | 0.961 | 1.14 | 0.28   | 0.892 | 0.597 | 1.3   | 0.552    | -0.657   |
| rs903501  | 17 | 35.093 | 1.05 | 0.938 | 1.18 | 0.363  | 0.708 | 0.417 | 1.06  | 0.161    | -0.147   |
| rs903502  | 17 | 35.083 | 1.06 | 0.946 | 1.17 | 0.31   | 0.752 | 0.466 | 1.1   | 0.195    | -0.204   |
| rs903507  | 17 | 34.980 | 1.01 | 0.975 | 1.05 | 0.595  | 0.718 | 0.393 | 1.15  | 0.224    | -0.0228  |
| rs907089  | 17 | 35.087 | 1.06 | 0.946 | 1.18 | 0.306  | 0.733 | 0.451 | 1.08  | 0.17     | -0.189   |
| rs907091  | 17 | 35.175 | 1.21 | 1.06  | 1.43 | 0.0191 | 0.424 | 0.255 | 0.637 | 0.000337 | -0.18    |
| rs907092  | 17 | 35.176 | 1.15 | 1.03  | 1.33 | 0.0268 | 0.462 | 0.273 | 0.698 | 0.00124  | -0.149   |
| rs907094  | 17 | 35.044 | 1.02 | 0.962 | 1.07 | 0.529  | 0.821 | 0.5   | 1.28  | 0.419    | -0.0783  |
| rs9303274 | 17 | 35.090 | 1.06 | 0.945 | 1.18 | 0.303  | 0.723 | 0.439 | 1.07  | 0.16     | -0.183   |
| rs9303277 | 17 | 35.230 | 1.19 | 1.03  | 1.42 | 0.038  | 0.475 | 0.282 | 0.704 | 0.00135  | -0.203   |
| rs9303280 | 17 | 35.328 | 1.19 | 1.03  | 1.45 | 0.0446 | 0.522 | 0.307 | 0.78  | 0.00697  | -0.268   |
| rs9303281 | 17 | 35.328 | 1.21 | 1.03  | 1.47 | 0.0412 | 0.539 | 0.315 | 0.799 | 0.00973  | -0.318   |
| rs931992  | 17 | 35.075 | 1.05 | 0.961 | 1.14 | 0.279  | 0.879 | 0.575 | 1.27  | 0.51     | -0.57    |
| rs9635726 | 17 | 35.274 | 1.01 | 0.884 | 1.1  | 0.832  | 0.674 | 0.313 | 1.15  | 0.239    | -0.0242  |
| rs9646419 | 17 | 34.851 | 1    | 0.987 | 1.02 | 0.682  | 0.715 | 0.39  | 1.1   | 0.212    | -0.00872 |
| rs9892055 | 17 | 34.764 | 1.06 | 0.977 | 1.17 | 0.183  | 0.79  | 0.508 | 1.12  | 0.23     | -0.32    |
| rs9894586 | 17 | 34.759 | 1.06 | 0.977 | 1.18 | 0.183  | 0.789 | 0.508 | 1.12  | 0.226    | -0.318   |
| rs9895948 | 17 | 35.362 | 1.05 | 0.991 | 1.13 | 0.152  | 0.731 | 0.476 | 1.06  | 0.124    | -0.159   |
| rs9901146 | 17 | 35.297 | 1.2  | 1.02  | 1.45 | 0.0443 | 0.497 | 0.301 | 0.742 | 0.00265  | -0.244   |
| rs9904334 | 17 | 34.722 | 1.07 | 0.977 | 1.18 | 0.181  | 0.776 | 0.497 | 1.1   | 0.193    | -0.293   |
| rs9904919 | 17 | 34.810 | 1.06 | 0.973 | 1.17 | 0.199  | 0.801 | 0.516 | 1.14  | 0.262    | -0.337   |
| rs9906612 | 17 | 34.801 | 1.01 | 0.987 | 1.03 | 0.607  | 0.712 | 0.388 | 1.1   | 0.215    | -0.0132  |
| rs9907088 | 17 | 35.289 | 1.15 | 1.01  | 1.35 | 0.0623 | 0.533 | 0.32  | 0.792 | 0.00748  | -0.201   |
| rs9908131 | 17 | 34.774 | 1.01 | 0.987 | 1.03 | 0.598  | 0.705 | 0.378 | 1.09  | 0.207    | -0.0129  |
| rs9909593 | 17 | 35.224 | 1.14 | 1.02  | 1.32 | 0.0487 | 0.505 | 0.302 | 0.753 | 0.00367  | -0.164   |
| rs9915323 | 17 | 35.024 | 1.06 | 0.97  | 1.17 | 0.202  | 0.819 | 0.542 | 1.21  | 0.336    | -0.38    |
| rs9916302 | 17 | 34.753 | 1.06 | 0.977 | 1.18 | 0.182  | 0.787 | 0.507 | 1.11  | 0.221    | -0.314   |
| rs9944411 | 17 | 34.737 | 1.07 | 0.977 | 1.18 | 0.181  | 0.78  | 0.502 | 1.11  | 0.204    | -0.302   |
| rs9972882 | 17 | 35.061 | 1.06 | 0.969 | 1.18 | 0.205  | 0.82  | 0.515 | 1.17  | 0.343    | -0.408   |

Table S13. Single-locus analyses for eQTL SNPs of the probe 235136\_at at *ORMDL3*. (Ch: chromosome; ME: mediation effect; AE: alternative effect; CI: confidence interval).

| SNP        | Ch | Location (Mb) | ME   | 95% CI |      | P-value | AE    | 95% CI |       | p-value | Proportion of Mediation |
|------------|----|---------------|------|--------|------|---------|-------|--------|-------|---------|-------------------------|
| rs1007654  | 17 | 35.365        | 1.02 | 0.934  | 1.15 | 0.692   | 0.776 | 0.513  | 1.09  | 0.19    | -0.0825                 |
| rs1007655  | 17 | 35.365        | 1.02 | 0.933  | 1.16 | 0.683   | 0.775 | 0.512  | 1.09  | 0.192   | -0.0868                 |
| rs1008723  | 17 | 35.320        | 1.05 | 0.917  | 1.24 | 0.493   | 0.637 | 0.4    | 0.884 | 0.0236  | -0.104                  |
| rs10445308 | 17 | 35.192        | 1.07 | 0.91   | 1.27 | 0.458   | 0.596 | 0.382  | 0.868 | 0.0143  | -0.107                  |
| rs1053651  | 17 | 35.076        | 1.01 | 0.935  | 1.12 | 0.783   | 0.803 | 0.48   | 1.12  | 0.327   | -0.0573                 |
| rs1054609  | 17 | 35.287        | 1.05 | 0.902  | 1.25 | 0.539   | 0.654 | 0.426  | 0.935 | 0.0346  | -0.109                  |
| rs1058808  | 17 | 35.138        | 1.02 | 0.91   | 1.15 | 0.756   | 0.716 | 0.424  | 1.07  | 0.149   | -0.0504                 |
| rs11078919 | 17 | 35.089        | 1.01 | 0.919  | 1.12 | 0.839   | 0.777 | 0.487  | 1.11  | 0.245   | -0.0379                 |
| rs11078925 | 17 | 35.279        | 1.05 | 0.902  | 1.26 | 0.523   | 0.645 | 0.418  | 0.926 | 0.0305  | -0.111                  |
| rs11078927 | 17 | 35.318        | 1.03 | 0.905  | 1.22 | 0.645   | 0.694 | 0.449  | 1.01  | 0.0717  | -0.0846                 |
| rs11557466 | 17 | 35.278        | 1.05 | 0.902  | 1.26 | 0.522   | 0.645 | 0.418  | 0.926 | 0.0303  | -0.111                  |
| rs11869286 | 17 | 35.067        | 1.01 | 0.947  | 1.09 | 0.776   | 0.887 | 0.588  | 1.24  | 0.534   | -0.0862                 |
| rs11870965 | 17 | 35.284        | 1.05 | 0.902  | 1.25 | 0.537   | 0.654 | 0.426  | 0.935 | 0.0342  | -0.109                  |
| rs12150079 | 17 | 35.279        | 1.08 | 0.952  | 1.27 | 0.297   | 0.69  | 0.448  | 1.01  | 0.0771  | -0.215                  |
| rs12150298 | 17 | 35.088        | 1.01 | 0.92   | 1.12 | 0.843   | 0.781 | 0.492  | 1.12  | 0.249   | -0.0371                 |
| rs12232497 | 17 | 35.294        | 1.05 | 0.902  | 1.25 | 0.541   | 0.656 | 0.428  | 0.938 | 0.0353  | -0.109                  |
| rs12603332 | 17 | 35.336        | 1.04 | 0.924  | 1.2  | 0.545   | 0.641 | 0.416  | 0.889 | 0.024   | -0.0797                 |
| rs12936231 | 17 | 35.283        | 1.07 | 0.913  | 1.27 | 0.447   | 0.6   | 0.384  | 0.847 | 0.00885 | -0.11                   |
| rs12950743 | 17 | 35.303        | 1.06 | 0.913  | 1.27 | 0.454   | 0.607 | 0.392  | 0.849 | 0.00981 | -0.11                   |
| rs1476278  | 17 | 35.090        | 1.01 | 0.919  | 1.12 | 0.838   | 0.777 | 0.486  | 1.11  | 0.244   | -0.0381                 |
| rs1565923  | 17 | 35.112        | 1.01 | 0.91   | 1.13 | 0.874   | 0.727 | 0.421  | 1.07  | 0.168   | -0.025                  |
| rs1619021  | 17 | 34.993        | 1.01 | 0.941  | 1.11 | 0.778   | 0.802 | 0.473  | 1.12  | 0.314   | -0.0537                 |
| rs17609240 | 17 | 35.364        | 1.03 | 0.934  | 1.16 | 0.611   | 0.739 | 0.484  | 1.06  | 0.125   | -0.0899                 |
| rs1810132  | 17 | 35.120        | 1.01 | 0.909  | 1.14 | 0.868   | 0.72  | 0.415  | 1.06  | 0.161   | -0.0257                 |
| rs1877031  | 17 | 35.068        | 1.01 | 0.948  | 1.09 | 0.777   | 0.887 | 0.589  | 1.24  | 0.532   | -0.0852                 |
| rs2271308  | 17 | 35.071        | 1.01 | 0.935  | 1.12 | 0.793   | 0.808 | 0.488  | 1.13  | 0.333   | -0.0553                 |
| rs2271309  | 17 | 35.039        | 1.05 | 0.92   | 1.31 | 0.579   | 0.845 | 0.261  | 1.3   | 0.672   | -0.377                  |
| rs2290400  | 17 | 35.320        | 1.05 | 0.918  | 1.24 | 0.499   | 0.637 | 0.403  | 0.875 | 0.0214  | -0.101                  |
| rs2305479  | 17 | 35.316        | 1.05 | 0.919  | 1.22 | 0.532   | 0.63  | 0.402  | 0.866 | 0.0189  | -0.0855                 |
| rs2305480  | 17 | 35.316        | 1.03 | 0.906  | 1.2  | 0.67    | 0.688 | 0.446  | 0.985 | 0.065   | -0.0724                 |
| rs2313171  | 17 | 35.087        | 1.01 | 0.92   | 1.12 | 0.846   | 0.783 | 0.495  | 1.12  | 0.253   | -0.0365                 |
| rs2313640  | 17 | 35.365        | 1.02 | 0.933  | 1.16 | 0.689   | 0.779 | 0.514  | 1.1   | 0.2     | -0.0873                 |
| rs2517954  | 17 | 35.097        | 1.01 | 0.912  | 1.13 | 0.883   | 0.739 | 0.435  | 1.08  | 0.188   | -0.0234                 |
| rs2517955  | 17 | 35.097        | 1.02 | 0.914  | 1.14 | 0.778   | 0.725 | 0.438  | 1.08  | 0.161   | -0.0446                 |
| rs2517956  | 17 | 35.097        | 1.01 | 0.911  | 1.13 | 0.883   | 0.737 | 0.435  | 1.08  | 0.187   | -0.0234                 |
| rs2517957  | 17 | 35.092        | 1.01 | 0.918  | 1.12 | 0.834   | 0.774 | 0.481  | 1.11  | 0.24    | -0.0388                 |
| rs2517958  | 17 | 35.092        | 1.01 | 0.918  | 1.13 | 0.832   | 0.772 | 0.481  | 1.11  | 0.237   | -0.0392                 |
| rs2872507  | 17 | 35.294        | 1.05 | 0.902  | 1.25 | 0.542   | 0.656 | 0.429  | 0.939 | 0.0356  | -0.109                  |



|           |    |        |      |       |      |       |       |       |       |         |         |
|-----------|----|--------|------|-------|------|-------|-------|-------|-------|---------|---------|
| rs2941505 | 17 | 35.086 | 1.01 | 0.922 | 1.12 | 0.854 | 0.789 | 0.501 | 1.13  | 0.263   | -0.035  |
| rs2941506 | 17 | 35.087 | 1.01 | 0.921 | 1.12 | 0.851 | 0.787 | 0.499 | 1.13  | 0.26    | -0.0355 |
| rs2952151 | 17 | 35.082 | 1    | 0.923 | 1.11 | 0.956 | 0.8   | 0.493 | 1.13  | 0.292   | -0.0106 |
| rs2952155 | 17 | 35.115 | 1.05 | 0.892 | 1.28 | 0.639 | 0.765 | 0.349 | 1.19  | 0.385   | -0.175  |
| rs2952156 | 17 | 35.130 | 1.01 | 0.908 | 1.14 | 0.868 | 0.719 | 0.414 | 1.06  | 0.159   | -0.0258 |
| rs3816470 | 17 | 35.239 | 1.07 | 0.916 | 1.29 | 0.418 | 0.577 | 0.368 | 0.812 | 0.00549 | -0.109  |
| rs3894194 | 17 | 35.376 | 1.02 | 0.925 | 1.13 | 0.739 | 0.687 | 0.45  | 0.952 | 0.0435  | -0.0401 |
| rs3902025 | 17 | 35.373 | 1.03 | 0.92  | 1.17 | 0.613 | 0.698 | 0.465 | 0.98  | 0.0645  | -0.081  |
| rs4065985 | 17 | 35.355 | 1.04 | 0.924 | 1.22 | 0.54  | 0.606 | 0.384 | 0.899 | 0.0215  | -0.0725 |
| rs4378650 | 17 | 35.334 | 1.04 | 0.921 | 1.2  | 0.558 | 0.649 | 0.421 | 0.906 | 0.0292  | -0.0811 |
| rs4794820 | 17 | 35.343 | 1.03 | 0.906 | 1.2  | 0.684 | 0.729 | 0.485 | 1.08  | 0.127   | -0.0863 |
| rs4795397 | 17 | 35.277 | 1.06 | 0.902 | 1.26 | 0.522 | 0.644 | 0.418 | 0.926 | 0.0302  | -0.111  |
| rs4795400 | 17 | 35.321 | 1.04 | 0.9   | 1.23 | 0.629 | 0.705 | 0.456 | 1.02  | 0.0863  | -0.0996 |
| rs4795405 | 17 | 35.342 | 1.03 | 0.912 | 1.19 | 0.664 | 0.706 | 0.467 | 1.02  | 0.0865  | -0.077  |
| rs4795408 | 17 | 35.361 | 1.02 | 0.919 | 1.16 | 0.691 | 0.666 | 0.436 | 0.929 | 0.031   | -0.0519 |
| rs6503525 | 17 | 35.349 | 1.03 | 0.922 | 1.17 | 0.666 | 0.657 | 0.431 | 0.918 | 0.0258  | -0.0547 |
| rs6503526 | 17 | 35.368 | 1.02 | 0.921 | 1.15 | 0.711 | 0.655 | 0.434 | 0.917 | 0.0257  | -0.0432 |
| rs6503527 | 17 | 35.368 | 1.02 | 0.93  | 1.17 | 0.679 | 0.792 | 0.52  | 1.13  | 0.237   | -0.105  |
| rs7207600 | 17 | 35.345 | 1.02 | 0.921 | 1.17 | 0.708 | 0.769 | 0.504 | 1.11  | 0.187   | -0.0836 |
| rs7212938 | 17 | 35.376 | 1.02 | 0.918 | 1.15 | 0.747 | 0.632 | 0.406 | 0.91  | 0.0243  | -0.0333 |
| rs7216389 | 17 | 35.323 | 1.05 | 0.916 | 1.24 | 0.496 | 0.645 | 0.41  | 0.903 | 0.0281  | -0.109  |
| rs7218321 | 17 | 35.368 | 1.02 | 0.931 | 1.16 | 0.684 | 0.784 | 0.515 | 1.11  | 0.216   | -0.0948 |
| rs7218742 | 17 | 35.368 | 1.02 | 0.932 | 1.16 | 0.687 | 0.781 | 0.515 | 1.11  | 0.207   | -0.0903 |
| rs7219080 | 17 | 35.368 | 1.02 | 0.931 | 1.16 | 0.684 | 0.785 | 0.515 | 1.12  | 0.219   | -0.096  |
| rs7219923 | 17 | 35.328 | 1.05 | 0.915 | 1.24 | 0.495 | 0.646 | 0.41  | 0.904 | 0.029   | -0.11   |
| rs7224129 | 17 | 35.329 | 1.05 | 0.914 | 1.24 | 0.495 | 0.647 | 0.409 | 0.906 | 0.0298  | -0.112  |
| rs7359623 | 17 | 35.303 | 1.07 | 0.914 | 1.27 | 0.433 | 0.591 | 0.386 | 0.835 | 0.00776 | -0.11   |
| rs7503195 | 17 | 34.976 | 1    | 0.944 | 1.06 | 0.946 | 0.973 | 0.679 | 1.39  | 0.884   | -0.0823 |
| rs8065126 | 17 | 35.353 | 1.02 | 0.927 | 1.16 | 0.703 | 0.77  | 0.508 | 1.09  | 0.185   | -0.0824 |
| rs8067378 | 17 | 35.305 | 1.06 | 0.913 | 1.27 | 0.457 | 0.609 | 0.396 | 0.851 | 0.0102  | -0.11   |
| rs8069176 | 17 | 35.311 | 1.04 | 0.904 | 1.22 | 0.618 | 0.675 | 0.435 | 0.974 | 0.0523  | -0.0867 |
| rs8076131 | 17 | 35.334 | 1.03 | 0.896 | 1.22 | 0.661 | 0.723 | 0.47  | 1.06  | 0.118   | -0.0973 |
| rs8076474 | 17 | 35.365 | 1.02 | 0.932 | 1.16 | 0.688 | 0.773 | 0.51  | 1.09  | 0.187   | -0.0844 |
| rs8078228 | 17 | 35.089 | 1.01 | 0.919 | 1.12 | 0.84  | 0.778 | 0.488 | 1.11  | 0.245   | -0.0378 |
| rs8079416 | 17 | 35.346 | 1.03 | 0.92  | 1.17 | 0.669 | 0.66  | 0.432 | 0.923 | 0.0264  | -0.0545 |
| rs8182252 | 17 | 34.981 | 1.05 | 0.914 | 1.35 | 0.582 | 0.745 | 0.174 | 1.19  | 0.548   | -0.188  |
| rs869402  | 17 | 35.322 | 1.05 | 0.916 | 1.24 | 0.494 | 0.643 | 0.41  | 0.898 | 0.0272  | -0.108  |
| rs881844  | 17 | 35.064 | 1.01 | 0.947 | 1.09 | 0.776 | 0.887 | 0.589 | 1.24  | 0.536   | -0.0871 |
| rs903501  | 17 | 35.093 | 1.01 | 0.916 | 1.13 | 0.853 | 0.767 | 0.462 | 1.13  | 0.256   | -0.0344 |
| rs903502  | 17 | 35.083 | 1.01 | 0.923 | 1.11 | 0.873 | 0.799 | 0.508 | 1.14  | 0.284   | -0.0314 |
| rs907089  | 17 | 35.087 | 1.01 | 0.921 | 1.12 | 0.847 | 0.784 | 0.496 | 1.12  | 0.254   | -0.0364 |
| rs907091  | 17 | 35.175 | 1.08 | 0.922 | 1.31 | 0.358 | 0.532 | 0.331 | 0.77  | 0.00263 | -0.105  |
| rs907092  | 17 | 35.176 | 1.07 | 0.908 | 1.28 | 0.447 | 0.588 | 0.38  | 0.856 | 0.0122  | -0.106  |

|           |    |        |      |       |      |       |       |       |       |         |         |
|-----------|----|--------|------|-------|------|-------|-------|-------|-------|---------|---------|
| rs907094  | 17 | 35.044 | 1.05 | 0.92  | 1.31 | 0.579 | 0.846 | 0.26  | 1.3   | 0.673   | -0.378  |
| rs9303274 | 17 | 35.090 | 1.01 | 0.918 | 1.12 | 0.836 | 0.775 | 0.483 | 1.11  | 0.241   | -0.0384 |
| rs9303277 | 17 | 35.230 | 1.07 | 0.918 | 1.28 | 0.419 | 0.577 | 0.371 | 0.812 | 0.00507 | -0.105  |
| rs9303280 | 17 | 35.328 | 1.05 | 0.919 | 1.24 | 0.478 | 0.609 | 0.387 | 0.858 | 0.014   | -0.0934 |
| rs9303281 | 17 | 35.328 | 1.05 | 0.915 | 1.24 | 0.496 | 0.646 | 0.41  | 0.903 | 0.0285  | -0.11   |
| rs931992  | 17 | 35.075 | 1.01 | 0.945 | 1.09 | 0.782 | 0.881 | 0.579 | 1.23  | 0.515   | -0.0809 |
| rs9635726 | 17 | 35.274 | 1.03 | 0.826 | 1.35 | 0.786 | 0.777 | 0.351 | 1.24  | 0.437   | -0.135  |
| rs9895948 | 17 | 35.362 | 1.02 | 0.931 | 1.16 | 0.692 | 0.772 | 0.509 | 1.09  | 0.186   | -0.0839 |
| rs9901146 | 17 | 35.297 | 1.06 | 0.913 | 1.27 | 0.452 | 0.605 | 0.389 | 0.847 | 0.00952 | -0.11   |
| rs9907088 | 17 | 35.289 | 1.05 | 0.902 | 1.25 | 0.54  | 0.655 | 0.427 | 0.937 | 0.035   | -0.109  |
| rs9909593 | 17 | 35.224 | 1.06 | 0.911 | 1.26 | 0.488 | 0.622 | 0.399 | 0.894 | 0.0194  | -0.108  |
| rs9915323 | 17 | 35.024 | 1.02 | 0.942 | 1.11 | 0.724 | 0.81  | 0.488 | 1.14  | 0.335   | -0.0743 |

Table S14. Single-locus analyses for eQTL SNPs of the probe 240701\_at at *ORMDL3*. (Ch: chromosome; ME: mediation effect; AE: alternative effect; CI: confidence interval).

| SNP        | Ch | Location (Mb) | ME    | 95% CI     | p-value | AE    | 95% CI      | p-value | Proportion of Mediation |
|------------|----|---------------|-------|------------|---------|-------|-------------|---------|-------------------------|
| rs1008723  | 17 | 35.320        | 0.931 | 0.843 1.03 | 0.158   | 0.655 | 0.427 0.954 | 0.037   | 0.116                   |
| rs10445308 | 17 | 35.192        | 0.934 | 0.853 1.03 | 0.161   | 0.638 | 0.42 0.937  | 0.0277  | 0.104                   |
| rs1054609  | 17 | 35.287        | 0.93  | 0.849 1.02 | 0.13    | 0.701 | 0.472 1.03  | 0.074   | 0.141                   |
| rs11078925 | 17 | 35.279        | 0.93  | 0.847 1.02 | 0.135   | 0.692 | 0.463 1.01  | 0.0656  | 0.136                   |
| rs11078927 | 17 | 35.318        | 0.941 | 0.868 1.02 | 0.15    | 0.689 | 0.452 1     | 0.0643  | 0.116                   |
| rs11557466 | 17 | 35.278        | 0.93  | 0.847 1.02 | 0.135   | 0.691 | 0.462 1.01  | 0.0654  | 0.136                   |
| rs11870965 | 17 | 35.284        | 0.93  | 0.848 1.02 | 0.13    | 0.7   | 0.471 1.02  | 0.0736  | 0.141                   |
| rs12150079 | 17 | 35.279        | 0.951 | 0.866 1.06 | 0.317   | 0.733 | 0.448 1.12  | 0.179   | 0.118                   |
| rs12232497 | 17 | 35.294        | 0.93  | 0.849 1.02 | 0.129   | 0.702 | 0.474 1.03  | 0.0751  | 0.142                   |
| rs12603332 | 17 | 35.336        | 0.953 | 0.892 1.03 | 0.171   | 0.65  | 0.438 0.952 | 0.0273  | 0.0798                  |
| rs12936231 | 17 | 35.283        | 0.924 | 0.832 1.03 | 0.154   | 0.668 | 0.452 0.993 | 0.0426  | 0.133                   |
| rs12950743 | 17 | 35.303        | 0.924 | 0.833 1.03 | 0.151   | 0.675 | 0.456 1     | 0.0468  | 0.136                   |
| rs2290400  | 17 | 35.320        | 0.933 | 0.847 1.03 | 0.16    | 0.656 | 0.426 0.957 | 0.0352  | 0.114                   |
| rs2305479  | 17 | 35.316        | 0.932 | 0.842 1.03 | 0.173   | 0.654 | 0.421 0.976 | 0.0361  | 0.114                   |
| rs2305480  | 17 | 35.316        | 0.94  | 0.864 1.02 | 0.157   | 0.691 | 0.455 1.01  | 0.0669  | 0.119                   |
| rs2872507  | 17 | 35.294        | 0.93  | 0.849 1.02 | 0.129   | 0.703 | 0.474 1.03  | 0.0755  | 0.142                   |
| rs3816470  | 17 | 35.239        | 0.925 | 0.83 1.03  | 0.17    | 0.643 | 0.427 0.96  | 0.0274  | 0.119                   |
| rs4378650  | 17 | 35.334        | 0.951 | 0.888 1.03 | 0.165   | 0.661 | 0.449 0.962 | 0.0338  | 0.0879                  |
| rs4795397  | 17 | 35.277        | 0.93  | 0.847 1.02 | 0.136   | 0.691 | 0.462 1.01  | 0.0652  | 0.136                   |
| rs4795400  | 17 | 35.321        | 0.936 | 0.861 1.02 | 0.132   | 0.7   | 0.456 1.01  | 0.0791  | 0.13                    |
| rs7216389  | 17 | 35.323        | 0.928 | 0.839 1.03 | 0.15    | 0.662 | 0.442 0.96  | 0.042   | 0.123                   |
| rs7219923  | 17 | 35.328        | 0.928 | 0.838 1.03 | 0.148   | 0.664 | 0.443 0.963 | 0.0438  | 0.125                   |
| rs7224129  | 17 | 35.329        | 0.928 | 0.838 1.03 | 0.147   | 0.666 | 0.444 0.969 | 0.0453  | 0.126                   |
| rs7359623  | 17 | 35.303        | 0.923 | 0.826 1.04 | 0.174   | 0.666 | 0.445 1.01  | 0.0464  | 0.133                   |
| rs8067378  | 17 | 35.305        | 0.924 | 0.833 1.03 | 0.15    | 0.677 | 0.458 1     | 0.0484  | 0.137                   |
| rs8069176  | 17 | 35.311        | 0.935 | 0.855 1.02 | 0.147   | 0.693 | 0.456 1.02  | 0.0694  | 0.127                   |
| rs8076131  | 17 | 35.334        | 0.94  | 0.87 1.02  | 0.122   | 0.73  | 0.479 1.07  | 0.119   | 0.14                    |
| rs869402   | 17 | 35.322        | 0.929 | 0.839 1.03 | 0.151   | 0.66  | 0.439 0.954 | 0.041   | 0.122                   |
| rs907091   | 17 | 35.175        | 0.932 | 0.84 1.04  | 0.207   | 0.586 | 0.38 0.875  | 0.00916 | 0.0873                  |
| rs907092   | 17 | 35.176        | 0.936 | 0.856 1.03 | 0.167   | 0.624 | 0.411 0.914 | 0.0208  | 0.0963                  |
| rs9303277  | 17 | 35.230        | 0.927 | 0.833 1.03 | 0.173   | 0.641 | 0.427 0.943 | 0.0255  | 0.116                   |
| rs9303280  | 17 | 35.328        | 0.943 | 0.869 1.03 | 0.17    | 0.623 | 0.4 0.909   | 0.0203  | 0.0862                  |
| rs9303281  | 17 | 35.328        | 0.928 | 0.839 1.03 | 0.149   | 0.663 | 0.443 0.961 | 0.0428  | 0.124                   |
| rs9901146  | 17 | 35.297        | 0.924 | 0.833 1.03 | 0.151   | 0.673 | 0.455 0.998 | 0.0455  | 0.135                   |
| rs9907088  | 17 | 35.289        | 0.93  | 0.849 1.02 | 0.129   | 0.702 | 0.473 1.03  | 0.0747  | 0.141                   |
| rs9909593  | 17 | 35.224        | 0.932 | 0.849 1.03 | 0.146   | 0.67  | 0.447 0.982 | 0.0453  | 0.122                   |

Table S15. Single-locus analyses for eQTL SNPs of the probe 209395\_at at *CHI3L1*. (Ch: chromosome; ME: mediation effect; AE: alternative effect; CI: confidence interval).

| SNP        | Ch | Location (Mb) | ME    | 95% CI |       | p-value | AE    | 95% CI |      | p-value | Proportion of Mediation |
|------------|----|---------------|-------|--------|-------|---------|-------|--------|------|---------|-------------------------|
| rs10399931 | 1  | 201.423       | 1.24  | 1.08   | 1.58  | 0.0394  | 0.933 | 0.284  | 1.3  | 0.881   | 1.44                    |
| rs10920579 | 1  | 201.426       | 1.14  | 1.04   | 1.45  | 0.151   | 0.787 | 0.162  | 1.08 | 0.698   | -1.06                   |
| rs1538372  | 1  | 201.421       | 0.829 | 0.71   | 0.909 | 0.00332 | 1.26  | 0.825  | 2.56 | 0.415   | -4.52                   |
| rs2153101  | 1  | 201.435       | 1.13  | 1.04   | 1.43  | 0.155   | 0.785 | 0.179  | 1.09 | 0.671   | -0.885                  |
| rs2486064  | 1  | 201.435       | 0.947 | 0.896  | 0.978 | 0.0173  | 0.913 | 0.531  | 1.42 | 0.713   | 0.356                   |
| rs2494277  | 1  | 201.435       | 1.13  | 1.04   | 1.43  | 0.155   | 0.784 | 0.177  | 1.09 | 0.673   | -0.882                  |
| rs4950882  | 1  | 201.431       | 1.13  | 1.04   | 1.43  | 0.152   | 0.782 | 0.162  | 1.08 | 0.686   | -0.898                  |
| rs4950928  | 1  | 201.423       | 1.26  | 1.08   | 1.68  | 0.0616  | 0.679 | 0.0977 | 1    | 0.613   | -1.17                   |
| rs4950929  | 1  | 201.427       | 1.14  | 1.04   | 1.44  | 0.151   | 0.785 | 0.161  | 1.08 | 0.694   | -0.999                  |
| rs7518666  | 1  | 201.430       | 1.13  | 1.04   | 1.44  | 0.152   | 0.783 | 0.161  | 1.08 | 0.69    | -0.943                  |
| rs7541061  | 1  | 201.430       | 1.13  | 1.04   | 1.44  | 0.152   | 0.784 | 0.161  | 1.08 | 0.69    | -0.947                  |
| rs7556099  | 1  | 201.433       | 1.14  | 1.04   | 1.49  | 0.181   | 0.764 | 0.143  | 1.08 | 0.7     | -0.835                  |
| rs946262   | 1  | 201.425       | 1.14  | 1.04   | 1.45  | 0.151   | 0.788 | 0.162  | 1.08 | 0.7     | -1.08                   |
| rs946263   | 1  | 201.432       | 1.13  | 1.04   | 1.42  | 0.153   | 0.781 | 0.162  | 1.08 | 0.683   | -0.863                  |

Table S16. Single-locus analyses for eQTL SNPs of the probe 209396\_s\_at at *CHI3L1*. (Ch: chromosome; ME: mediation effect; AE: alternative effect; CI: confidence interval).

| SNP        | Ch | Location (Mb) | ME    | 95% CI |       | p-value | AE    | 95% CI |      | p-value | Proportion of Mediation |
|------------|----|---------------|-------|--------|-------|---------|-------|--------|------|---------|-------------------------|
| rs10399931 | 1  | 201.423       | 1.08  | 0.985  | 1.25  | 0.174   | 1.01  | 0.581  | 1.39 | 0.96    | 0.876                   |
| rs10920579 | 1  | 201.426       | 1.06  | 0.991  | 1.21  | 0.246   | 0.805 | 0.406  | 1.11 | 0.418   | -0.342                  |
| rs1538372  | 1  | 201.421       | 0.908 | 0.83   | 0.968 | 0.0161  | 1.06  | 0.689  | 1.71 | 0.796   | 2.7                     |
| rs2153101  | 1  | 201.435       | 1.06  | 0.989  | 1.2   | 0.258   | 0.795 | 0.398  | 1.11 | 0.399   | -0.294                  |
| rs2486064  | 1  | 201.435       | 0.964 | 0.929  | 0.991 | 0.0254  | 0.928 | 0.58   | 1.36 | 0.727   | 0.32                    |
| rs2494277  | 1  | 201.435       | 1.06  | 0.989  | 1.2   | 0.257   | 0.795 | 0.398  | 1.1  | 0.398   | -0.296                  |
| rs4950882  | 1  | 201.431       | 1.06  | 0.992  | 1.2   | 0.246   | 0.8   | 0.402  | 1.11 | 0.405   | -0.313                  |
| rs4950928  | 1  | 201.423       | 1.1   | 0.99   | 1.31  | 0.184   | 0.773 | 0.372  | 1.09 | 0.367   | -0.495                  |
| rs4950929  | 1  | 201.427       | 1.06  | 0.991  | 1.2   | 0.246   | 0.803 | 0.405  | 1.11 | 0.413   | -0.332                  |
| rs7518666  | 1  | 201.430       | 1.06  | 0.992  | 1.2   | 0.246   | 0.801 | 0.404  | 1.11 | 0.408   | -0.321                  |
| rs7541061  | 1  | 201.430       | 1.06  | 0.992  | 1.2   | 0.246   | 0.801 | 0.404  | 1.11 | 0.409   | -0.322                  |
| rs7556099  | 1  | 201.433       | 1.05  | 0.983  | 1.2   | 0.311   | 0.774 | 0.368  | 1.1  | 0.378   | -0.23                   |
| rs946262   | 1  | 201.425       | 1.06  | 0.99   | 1.21  | 0.245   | 0.805 | 0.407  | 1.11 | 0.42    | -0.347                  |
| rs946263   | 1  | 201.432       | 1.06  | 0.992  | 1.2   | 0.246   | 0.799 | 0.404  | 1.11 | 0.402   | -0.306                  |

Table S17. Single-locus analyses for eQTL SNPs of the probe 226333\_at at *IL6R*. (Ch: chromosome; ME: mediation effect; AE: alternative effect; CI: confidence interval).

| SNP        | Ch | Location (Mb) | ME    | 95% CI | p-value | AE      | 95% CI | p-value | Proportion of Mediation |        |          |
|------------|----|---------------|-------|--------|---------|---------|--------|---------|-------------------------|--------|----------|
| rs10908423 | 1  | 152.911       | 1     | 1      | 1.01    | 0.00674 | 1.01   | 0.579   | 1.43                    | 0.979  | 0.346    |
| rs10908835 | 1  | 152.623       | 1.02  | 1      | 1.05    | 0.0433  | 0.945  | 0.582   | 1.36                    | 0.785  | -0.602   |
| rs11265604 | 1  | 152.619       | 0.989 | 0.98   | 0.996   | 0.00825 | 0.912  | 0.595   | 1.33                    | 0.652  | 0.1      |
| rs11265608 | 1  | 152.631       | 1.02  | 0.83   | 1.39    | 0.873   | 0.542  | 0.116   | 0.967                   | 0.288  | -0.0256  |
| rs11808153 | 1  | 152.505       | 1.02  | 0.904  | 1.16    | 0.806   | 0.648  | 0.218   | 1.14                    | 0.325  | -0.0296  |
| rs11809740 | 1  | 152.586       | 1.02  | 0.992  | 1.08    | 0.248   | 0.855  | 0.48    | 1.25                    | 0.519  | -0.171   |
| rs11811448 | 1  | 152.531       | 0.999 | 0.886  | 1.16    | 0.991   | 0.638  | 0.19    | 1.22                    | 0.354  | 0.00134  |
| rs1194610  | 1  | 152.563       | 1.13  | 1.02   | 1.26    | 0.0259  | 0.957  | 0.612   | 1.44                    | 0.841  | 1.53     |
| rs12121085 | 1  | 152.622       | 0.995 | 0.992  | 0.998   | 0.00686 | 0.888  | 0.572   | 1.31                    | 0.582  | 0.0346   |
| rs1212352  | 1  | 152.506       | 0.973 | 0.951  | 0.99    | 0.00773 | 0.751  | 0.527   | 1.04                    | 0.0939 | 0.0767   |
| rs12127600 | 1  | 152.623       | 1.02  | 1      | 1.05    | 0.0431  | 0.944  | 0.581   | 1.36                    | 0.781  | -0.62    |
| rs1685633  | 1  | 152.558       | 1.08  | 0.859  | 1.5     | 0.607   | 0.694  | 0.206   | 1.19                    | 0.443  | -0.219   |
| rs1760796  | 1  | 152.574       | 1.03  | 0.99   | 1.08    | 0.253   | 0.869  | 0.488   | 1.27                    | 0.565  | -0.202   |
| rs2274988  | 1  | 152.583       | 1.03  | 0.991  | 1.08    | 0.247   | 0.856  | 0.486   | 1.26                    | 0.524  | -0.177   |
| rs2297606  | 1  | 152.588       | 1.05  | 1      | 1.12    | 0.0901  | 0.987  | 0.61    | 1.39                    | 0.95   | 1.37     |
| rs2297607  | 1  | 152.588       | 1.02  | 0.976  | 1.09    | 0.444   | 0.826  | 0.417   | 1.25                    | 0.503  | -0.115   |
| rs2481065  | 1  | 152.579       | 1.08  | 0.863  | 1.5     | 0.587   | 0.688  | 0.195   | 1.15                    | 0.431  | -0.222   |
| rs2988721  | 1  | 152.575       | 1.03  | 0.99   | 1.08    | 0.251   | 0.869  | 0.488   | 1.27                    | 0.563  | -0.202   |
| rs4075015  | 1  | 152.656       | 0.988 | 0.978  | 0.996   | 0.00676 | 0.86   | 0.523   | 1.35                    | 0.52   | 0.0682   |
| rs4103781  | 1  | 152.547       | 0.991 | 0.984  | 0.998   | 0.0109  | 1.06   | 0.715   | 1.47                    | 0.756  | -0.183   |
| rs4845617  | 1  | 152.645       | 1.05  | 1.01   | 1.09    | 0.0249  | 1.04   | 0.631   | 1.53                    | 0.87   | 0.578    |
| rs6427560  | 1  | 152.554       | 1.03  | 0.991  | 1.1     | 0.225   | 0.903  | 0.505   | 1.35                    | 0.686  | -0.428   |
| rs6427627  | 1  | 152.626       | 1.02  | 1      | 1.05    | 0.0434  | 0.945  | 0.583   | 1.36                    | 0.785  | -0.601   |
| rs7521837  | 1  | 152.519       | 1.01  | 0.996  | 1.02    | 0.305   | 0.605  | 0.318   | 0.921                   | 0.068  | -0.00788 |
| rs9330261  | 1  | 152.902       | 1.01  | 1      | 1.01    | 0.0121  | 1.18   | 0.811   | 1.62                    | 0.349  | 0.0372   |
| rs9426832  | 1  | 152.899       | 1     | 1      | 1.01    | 0.0111  | 1.18   | 0.819   | 1.61                    | 0.339  | 0.0248   |
| rs9427117  | 1  | 152.899       | 1.01  | 1      | 1.01    | 0.012   | 1.18   | 0.815   | 1.63                    | 0.334  | 0.0354   |
| rs9427118  | 1  | 152.904       | 1.04  | 0.993  | 1.12    | 0.16    | 1.22   | 0.746   | 1.91                    | 0.396  | 0.197    |
| rs952146   | 1  | 152.636       | 1.02  | 1      | 1.05    | 0.042   | 0.951  | 0.586   | 1.37                    | 0.809  | -0.756   |

Table S18. Single-locus analyses for eQTL SNPs of the probe 205945\_at at *IL6R*. (Ch: chromosome; ME: mediation effect; AE: alternative effect; CI: confidence interval).

| SNP        | Ch | Location (Mb) | ME    | 95% CI     | p-value | AE    | 95% CI      | p-value | Proportion of Mediation |
|------------|----|---------------|-------|------------|---------|-------|-------------|---------|-------------------------|
| rs10908831 | 1  | 152.595       | 1.01  | 0.984 1.04 | 0.405   | 1.09  | 0.748 1.49  | 0.637   | 0.129                   |
| rs10908835 | 1  | 152.623       | 1     | 0.999 1    | 0.97    | 0.994 | 0.62 1.41   | 0.974   | 0.00337                 |
| rs11265604 | 1  | 152.619       | 0.992 | 0.973 1.01 | 0.458   | 0.929 | 0.559 1.34  | 0.738   | 0.092                   |
| rs11265608 | 1  | 152.631       | 0.993 | 0.728 1.29 | 0.961   | 0.787 | 0.176 1.23  | 0.772   | 0.0263                  |
| rs11808153 | 1  | 152.505       | 0.954 | 0.831 1.08 | 0.458   | 0.743 | 0.255 1.3   | 0.484   | 0.118                   |
| rs11809740 | 1  | 152.586       | 0.998 | 0.961 1.04 | 0.915   | 0.948 | 0.535 1.34  | 0.821   | 0.037                   |
| rs11811448 | 1  | 152.531       | 0.937 | 0.814 1.06 | 0.332   | 0.756 | 0.214 1.46  | 0.559   | 0.163                   |
| rs1194610  | 1  | 152.563       | 1.04  | 0.951 1.13 | 0.356   | 1.05  | 0.692 1.53  | 0.804   | 0.462                   |
| rs12121085 | 1  | 152.622       | 0.993 | 0.978 1.01 | 0.384   | 0.904 | 0.526 1.32  | 0.669   | 0.0626                  |
| rs12127600 | 1  | 152.623       | 1     | 1 1        | 0.965   | 0.994 | 0.621 1.41  | 0.976   | 0.000156                |
| rs1685633  | 1  | 152.558       | 1.04  | 0.767 1.4  | 0.78    | 0.979 | 0.328 1.49  | 0.965   | 1.92                    |
| rs1760796  | 1  | 152.574       | 0.998 | 0.959 1.04 | 0.904   | 0.967 | 0.539 1.36  | 0.886   | 0.0664                  |
| rs2274988  | 1  | 152.583       | 0.998 | 0.96 1.04  | 0.922   | 0.951 | 0.533 1.34  | 0.83    | 0.0365                  |
| rs2297607  | 1  | 152.588       | 0.994 | 0.944 1.05 | 0.815   | 0.982 | 0.505 1.41  | 0.945   | 0.246                   |
| rs2481065  | 1  | 152.579       | 1.05  | 0.779 1.4  | 0.756   | 0.954 | 0.311 1.42  | 0.924   | 38.9                    |
| rs2988721  | 1  | 152.575       | 0.998 | 0.959 1.04 | 0.908   | 0.966 | 0.539 1.36  | 0.883   | 0.0623                  |
| rs4075015  | 1  | 152.656       | 0.991 | 0.971 1.01 | 0.379   | 0.883 | 0.493 1.34  | 0.617   | 0.0627                  |
| rs4845617  | 1  | 152.645       | 1     | 0.993 1.01 | 0.853   | 1.05  | 0.645 1.5   | 0.81    | 0.0127                  |
| rs6427560  | 1  | 152.554       | 1     | 0.948 1.06 | 0.99    | 1.01  | 0.585 1.44  | 0.975   | 0.0444                  |
| rs6427627  | 1  | 152.626       | 1     | 0.999 1    | 0.97    | 0.994 | 0.62 1.41   | 0.974   | 0.00342                 |
| rs7521837  | 1  | 152.519       | 0.999 | 0.995 1    | 0.344   | 0.606 | 0.299 0.871 | 0.0773  | 0.00229                 |
| rs952146   | 1  | 152.636       | 1     | 0.999 1    | 0.963   | 0.999 | 0.624 1.42  | 0.996   | 0.0211                  |

Table S19. Single-locus analyses for eQTL SNPs of the probe 206618\_at at *IL18R1*. (Ch: chromosome; ME: mediation effect; AE: alternative effect; CI: confidence interval).

| SNP        | Ch | Location (Mb) | ME    | 95% CI |      | p-value | AE    | 95% CI |      | p-value | Proportion of Mediation |
|------------|----|---------------|-------|--------|------|---------|-------|--------|------|---------|-------------------------|
| rs10170583 | 2  | 102.341       | 0.986 | 0.911  | 1.08 | 0.748   | 1.09  | 0.712  | 1.59 | 0.666   | -0.191                  |
| rs10176664 | 2  | 102.343       | 0.987 | 0.913  | 1.08 | 0.762   | 1.07  | 0.694  | 1.54 | 0.728   | -0.227                  |
| rs10192157 | 2  | 102.335       | 0.989 | 0.914  | 1.08 | 0.783   | 1.05  | 0.682  | 1.51 | 0.804   | -0.307                  |
| rs10200952 | 2  | 102.394       | 0.994 | 0.935  | 1.07 | 0.865   | 1.22  | 0.817  | 1.72 | 0.292   | -0.033                  |
| rs10203558 | 2  | 102.394       | 0.994 | 0.935  | 1.07 | 0.865   | 1.22  | 0.817  | 1.72 | 0.292   | -0.0331                 |
| rs10206291 | 2  | 102.405       | 0.994 | 0.935  | 1.07 | 0.866   | 1.22  | 0.817  | 1.72 | 0.285   | -0.0324                 |
| rs10208196 | 2  | 102.363       | 0.994 | 0.935  | 1.07 | 0.867   | 1.22  | 0.815  | 1.73 | 0.282   | -0.0322                 |
| rs10208293 | 2  | 102.333       | 1.03  | 0.936  | 1.13 | 0.552   | 0.912 | 0.543  | 1.36 | 0.688   | -0.412                  |
| rs10439410 | 2  | 102.357       | 0.994 | 0.935  | 1.07 | 0.866   | 1.22  | 0.814  | 1.72 | 0.28    | -0.0323                 |
| rs11123934 | 2  | 102.482       | 0.998 | 0.963  | 1.05 | 0.939   | 1.09  | 0.635  | 1.54 | 0.682   | -0.0194                 |
| rs13021177 | 2  | 102.423       | 0.994 | 0.935  | 1.07 | 0.866   | 1.22  | 0.816  | 1.72 | 0.282   | -0.0322                 |
| rs13424006 | 2  | 102.334       | 0.989 | 0.914  | 1.08 | 0.788   | 1.04  | 0.677  | 1.5  | 0.838   | -0.384                  |
| rs1362348  | 2  | 102.351       | 0.987 | 0.913  | 1.08 | 0.759   | 1.08  | 0.699  | 1.57 | 0.703   | -0.207                  |
| rs1420094  | 2  | 102.382       | 0.994 | 0.935  | 1.07 | 0.865   | 1.21  | 0.814  | 1.72 | 0.303   | -0.0336                 |
| rs1420097  | 2  | 102.376       | 0.994 | 0.935  | 1.07 | 0.866   | 1.21  | 0.815  | 1.72 | 0.3     | -0.0333                 |
| rs1420100  | 2  | 102.403       | 0.994 | 0.935  | 1.07 | 0.866   | 1.22  | 0.817  | 1.72 | 0.286   | -0.0325                 |
| rs1420105  | 2  | 102.402       | 0.994 | 0.935  | 1.07 | 0.865   | 1.22  | 0.817  | 1.72 | 0.288   | -0.0327                 |
| rs1523198  | 2  | 102.465       | 0.995 | 0.958  | 1.04 | 0.817   | 1.12  | 0.703  | 1.56 | 0.552   | -0.0483                 |
| rs1592458  | 2  | 102.398       | 0.994 | 0.935  | 1.07 | 0.865   | 1.22  | 0.817  | 1.72 | 0.29    | -0.0329                 |
| rs17027173 | 2  | 102.423       | 0.991 | 0.931  | 1.07 | 0.794   | 1.06  | 0.669  | 1.78 | 0.816   | -0.192                  |
| rs1861245  | 2  | 102.333       | 0.989 | 0.914  | 1.08 | 0.788   | 1.04  | 0.676  | 1.5  | 0.841   | -0.392                  |
| rs1974675  | 2  | 102.353       | 0.988 | 0.913  | 1.08 | 0.774   | 1.08  | 0.709  | 1.6  | 0.7     | -0.186                  |
| rs2041739  | 2  | 102.361       | 0.994 | 0.935  | 1.07 | 0.867   | 1.22  | 0.815  | 1.73 | 0.282   | -0.0322                 |
| rs2058659  | 2  | 102.421       | 0.994 | 0.935  | 1.07 | 0.866   | 1.22  | 0.816  | 1.72 | 0.282   | -0.0322                 |
| rs2075188  | 2  | 102.487       | 0.999 | 0.966  | 1.04 | 0.95    | 1.07  | 0.619  | 1.51 | 0.743   | -0.0176                 |
| rs2075189  | 2  | 102.485       | 0.999 | 0.966  | 1.04 | 0.948   | 1.08  | 0.62   | 1.52 | 0.732   | -0.0179                 |
| rs2110662  | 2  | 102.387       | 0.994 | 0.935  | 1.07 | 0.865   | 1.22  | 0.816  | 1.72 | 0.297   | -0.0333                 |
| rs2287033  | 2  | 102.378       | 0.994 | 0.935  | 1.07 | 0.865   | 1.21  | 0.814  | 1.72 | 0.303   | -0.0336                 |
| rs2293224  | 2  | 102.402       | 0.994 | 0.935  | 1.07 | 0.865   | 1.22  | 0.817  | 1.72 | 0.287   | -0.0326                 |
| rs2310300  | 2  | 102.416       | 0.994 | 0.935  | 1.07 | 0.866   | 1.22  | 0.816  | 1.72 | 0.283   | -0.0321                 |
| rs3213732  | 2  | 102.365       | 0.994 | 0.935  | 1.07 | 0.867   | 1.22  | 0.815  | 1.73 | 0.285   | -0.0323                 |
| rs3732124  | 2  | 102.384       | 0.994 | 0.935  | 1.07 | 0.865   | 1.21  | 0.815  | 1.72 | 0.301   | -0.0336                 |
| rs3755265  | 2  | 102.419       | 0.994 | 0.935  | 1.07 | 0.866   | 1.22  | 0.816  | 1.72 | 0.282   | -0.0321                 |
| rs3755266  | 2  | 102.409       | 0.994 | 0.935  | 1.07 | 0.866   | 1.22  | 0.816  | 1.72 | 0.283   | -0.0321                 |
| rs3755276  | 2  | 102.345       | 0.987 | 0.913  | 1.08 | 0.762   | 1.07  | 0.694  | 1.55 | 0.724   | -0.223                  |
| rs3771154  | 2  | 102.406       | 0.994 | 0.935  | 1.07 | 0.866   | 1.22  | 0.817  | 1.72 | 0.285   | -0.0324                 |
| rs3771155  | 2  | 102.404       | 0.994 | 0.935  | 1.07 | 0.866   | 1.22  | 0.817  | 1.72 | 0.285   | -0.0324                 |
| rs3771166  | 2  | 102.353       | 0.988 | 0.913  | 1.08 | 0.775   | 1.08  | 0.705  | 1.59 | 0.717   | -0.198                  |



|           |   |         |       |       |      |       |      |       |      |       |         |
|-----------|---|---------|-------|-------|------|-------|------|-------|------|-------|---------|
| rs4479442 | 2 | 102.421 | 0.994 | 0.935 | 1.07 | 0.866 | 1.22 | 0.816 | 1.72 | 0.282 | -0.0321 |
| rs4851004 | 2 | 102.376 | 0.994 | 0.935 | 1.07 | 0.865 | 1.21 | 0.814 | 1.72 | 0.303 | -0.0336 |
| rs4851571 | 2 | 102.385 | 0.994 | 0.935 | 1.07 | 0.865 | 1.21 | 0.816 | 1.72 | 0.299 | -0.0334 |
| rs4851572 | 2 | 102.385 | 0.994 | 0.935 | 1.07 | 0.865 | 1.21 | 0.816 | 1.72 | 0.298 | -0.0334 |
| rs4988955 | 2 | 102.334 | 0.989 | 0.914 | 1.08 | 0.786 | 1.05 | 0.679 | 1.51 | 0.823 | -0.346  |
| rs4988956 | 2 | 102.334 | 0.989 | 0.914 | 1.08 | 0.785 | 1.05 | 0.68  | 1.51 | 0.818 | -0.335  |
| rs4988957 | 2 | 102.335 | 0.989 | 0.914 | 1.08 | 0.785 | 1.05 | 0.68  | 1.51 | 0.815 | -0.328  |
| rs4988958 | 2 | 102.335 | 0.989 | 0.914 | 1.08 | 0.784 | 1.05 | 0.681 | 1.51 | 0.81  | -0.318  |
| rs6543135 | 2 | 102.429 | 0.981 | 0.896 | 1.08 | 0.685 | 1.08 | 0.688 | 1.77 | 0.74  | -0.323  |
| rs6543150 | 2 | 102.480 | 0.998 | 0.961 | 1.05 | 0.935 | 1.1  | 0.635 | 1.54 | 0.654 | -0.0203 |
| rs6706002 | 2 | 102.373 | 0.994 | 0.935 | 1.07 | 0.867 | 1.22 | 0.815 | 1.73 | 0.293 | -0.0328 |
| rs6710034 | 2 | 102.390 | 0.994 | 0.935 | 1.07 | 0.865 | 1.22 | 0.816 | 1.72 | 0.296 | -0.0332 |
| rs6710528 | 2 | 102.383 | 0.994 | 0.935 | 1.07 | 0.865 | 1.21 | 0.815 | 1.72 | 0.302 | -0.0336 |
| rs6741235 | 2 | 102.484 | 0.999 | 0.965 | 1.04 | 0.945 | 1.08 | 0.623 | 1.53 | 0.718 | -0.0184 |
| rs6743516 | 2 | 102.403 | 0.994 | 0.935 | 1.07 | 0.866 | 1.22 | 0.817 | 1.72 | 0.286 | -0.0325 |
| rs6749014 | 2 | 102.373 | 0.994 | 0.935 | 1.07 | 0.867 | 1.22 | 0.815 | 1.73 | 0.295 | -0.033  |
| rs6749114 | 2 | 102.334 | 0.989 | 0.914 | 1.08 | 0.787 | 1.04 | 0.678 | 1.51 | 0.83  | -0.362  |
| rs6751967 | 2 | 102.334 | 0.989 | 0.914 | 1.08 | 0.788 | 1.04 | 0.677 | 1.5  | 0.837 | -0.38   |
| rs6758936 | 2 | 102.358 | 0.994 | 0.935 | 1.07 | 0.867 | 1.22 | 0.814 | 1.73 | 0.281 | -0.0323 |
| rs6759479 | 2 | 102.406 | 0.994 | 0.935 | 1.07 | 0.866 | 1.22 | 0.816 | 1.72 | 0.284 | -0.0323 |
| rs6760621 | 2 | 102.366 | 0.994 | 0.935 | 1.07 | 0.867 | 1.22 | 0.815 | 1.73 | 0.288 | -0.0325 |
| rs7558013 | 2 | 102.359 | 0.983 | 0.911 | 1.07 | 0.68  | 1.02 | 0.643 | 1.64 | 0.922 | -2.67   |
| rs7559566 | 2 | 102.394 | 0.994 | 0.935 | 1.07 | 0.865 | 1.22 | 0.817 | 1.72 | 0.292 | -0.033  |
| rs7559845 | 2 | 102.413 | 0.994 | 0.935 | 1.07 | 0.866 | 1.22 | 0.816 | 1.72 | 0.283 | -0.0321 |
| rs7573566 | 2 | 102.482 | 0.998 | 0.962 | 1.05 | 0.938 | 1.1  | 0.637 | 1.54 | 0.673 | -0.0197 |
| rs7594402 | 2 | 102.388 | 0.994 | 0.935 | 1.07 | 0.865 | 1.22 | 0.816 | 1.72 | 0.296 | -0.0333 |
| rs7603730 | 2 | 102.341 | 0.988 | 0.913 | 1.08 | 0.771 | 1.06 | 0.694 | 1.52 | 0.77  | -0.267  |
| rs885088  | 2 | 102.405 | 0.994 | 0.935 | 1.07 | 0.866 | 1.22 | 0.817 | 1.72 | 0.285 | -0.0324 |

Table S20. Single-locus analyses for eQTL SNPs of the probe 209349\_at at *RAD50*. (Ch: chromosome; ME: mediation effect; AE: alternative effect; CI: confidence interval).

| SNP        | Ch | Location (Mb) | ME    | 95% CI |      | p-value | AE    | 95% CI |      | p-value | Proportion of Mediation |
|------------|----|---------------|-------|--------|------|---------|-------|--------|------|---------|-------------------------|
| rs11738703 | 5  | 131.884       | 1.02  | 0.892  | 1.18 | 0.799   | 1.17  | 0.727  | 1.74 | 0.483   | 0.109                   |
| rs11739623 | 5  | 131.892       | 1.02  | 0.891  | 1.16 | 0.821   | 1.14  | 0.708  | 1.68 | 0.57    | 0.113                   |
| rs11741255 | 5  | 131.839       | 0.993 | 0.927  | 1.07 | 0.853   | 1.01  | 0.627  | 1.45 | 0.955   | -1.25                   |
| rs11745207 | 5  | 131.884       | 1.02  | 0.89   | 1.18 | 0.807   | 1.16  | 0.722  | 1.73 | 0.513   | 0.11                    |
| rs17622656 | 5  | 131.849       | 0.997 | 0.938  | 1.06 | 0.929   | 0.997 | 0.633  | 1.4  | 0.987   | 0.46                    |
| rs17691077 | 5  | 132.071       | 1.51  | 0.666  | 4.02 | 0.365   | 3.28  | 0.561  | 12.6 | 0.109   | 0.422                   |
| rs17772583 | 5  | 131.981       | 0.991 | 0.806  | 1.22 | 0.932   | 0.89  | 0.548  | 1.49 | 0.652   | 0.0653                  |
| rs2057687  | 5  | 131.915       | 1     | 0.94   | 1.08 | 0.9     | 1.04  | 0.636  | 1.57 | 0.852   | 0.0939                  |
| rs2069812  | 5  | 131.908       | 1.02  | 0.873  | 1.18 | 0.841   | 0.881 | 0.554  | 1.42 | 0.601   | -0.129                  |
| rs2237060  | 5  | 131.999       | 1.02  | 0.941  | 1.12 | 0.672   | 1.16  | 0.752  | 1.69 | 0.476   | 0.121                   |
| rs4705959  | 5  | 131.894       | 1.01  | 0.889  | 1.16 | 0.863   | 1.18  | 0.737  | 1.77 | 0.469   | 0.0717                  |
| rs743562   | 5  | 131.900       | 0.992 | 0.933  | 1.05 | 0.798   | 1.23  | 0.822  | 1.77 | 0.296   | -0.044                  |

## REFERENCE

- Benjamini Y, Hochberg Y. 1995. Controlling the false discovery rate: a practical and powerful approach to multiple testing. *Journal of the Royal Statistical Society, Series B* 57:289-300.
- Davies R. 1980. Algorithm AS 155: The distribution of a linear combination of chi-square random variables. *Applied Statistics* 29:323-333.
- Huang YT, VanderWeele TJ, Lin X. 2014. Joint analysis of SNP and gene expression data in genetic association studies of complex diseases. *Annals of Applied Statistics* 34(1):162-178.
- Liang L, Morar N, Dixon AL, Lathrop GM, Abecasis GR, Moffatt MF, Cookson WO. 2013. A cross-platform analysis of 14,177 expression quantitative trait loci derived from lymphoblastoid cell lines. *Genome Res* 23(4):716-26.
- Marchini J, Howie B, Myers S, McVean G, Donnelly P. 2007. A new multipoint method for genome-wide association studies by imputation of genotypes. *Nat Genet* 39(7):906-13.
- Storey J. 2002. A direct approach to false discovery rate. *Journal of the Royal Statistical Society, Series B* 64:479-498.
- Vanderweele TJ, Vansteelandt S. 2010. Odds ratios for mediation analysis for a dichotomous outcome. *Am J Epidemiol* 172(12):1339-48.
- Wu MC, Lee S, Cai T, Li Y, Boehnke M, Lin X. 2011. Rare-variant association testing for sequencing data with the sequence kernel association test. *Am J Hum Genet* 89(1):82-93.
